# Supplementary material for: Genotyping by Sequencing for SNP-Based Linkage Analysis and the Development of KASPar Markers for Male Sterility and Polyembryony in Citrus
Source: Plants (Basel). 2023 Apr 6;12(7):1567. doi: 10.3390/plants12071567 (PMC10096700; doi:10.3390/plants12071567)
Supplement: Supplementary file 1 [file plants-12-01567-s001.zip › plants-2288451-Proof Done-supplementary-table.xlsx]

## Sheet: Table S1
Table S1. Number of filtered, discarded and used SNPs markers to perform the linkage mapping of `Kiyomi' and 'Murcott' tangors
Number of SNPs selected after SNP calling filters	6.444
Heterozygous for Kiyomi and Homozygous for Murcott	2.912
Discarded due to unexpected segregation	896
Discarded because they are located outside of a gene	503
Discarded because there is another SNP in the same gene	117
Used to perform the linkage mapping of Kiyomi	1.396
Heterozygous for Murcott and Homozygous for Kiyomi	1.37
Discarded due to unexpected segregation	302
Discarded because they are located outside of a gene	290
Discarded because there is another SNP in the same gene	41
Used to perform the linkage mapping of Murcott	737

## Sheet: Table S2
Table S2. Detail of the ‘Kiyomi’ genetic map including physical position (clementine reference genome), genetic position and the gene identifier on which the marker is located.
Marker	Scaffold	Phisical position	Linkage Group	Genetic position (cM)	Gene Identifier (Phytozome)
S01_2232106	1	2232106	1	0	ID=Ciclev10008268m.g
S01_2918735	1	2918735	1	7.407	ID=Ciclev10007989m.g
S01_2698390	1	2698390	1	7.407	ID=Ciclev10007225m.g
S01_2902940	1	2902940	1	7.407	ID=Ciclev10007316m.g
S01_2620817	1	2620817	1	11.105	ID=Ciclev10007235m.g
S01_2570376	1	2570376	1	11.105	ID=Ciclev10007403m.g
S01_2608730	1	2608730	1	11.105	ID=Ciclev10008850m.g
S01_3002166	1	3002166	1	13.896	ID=Ciclev10010565m.g
S01_3863756	1	3863756	1	22.991	ID=Ciclev10009236m.g
S01_5473434	1	5473434	1	34.049	ID=Ciclev10007554m.g
S01_6210592	1	6210592	1	34.054	ID=Ciclev10009547m.g
S01_6158523	1	6158523	1	34.054	ID=Ciclev10007961m.g
S01_6415400	1	6415400	1	37.442	ID=Ciclev10008039m.g
S01_6430810	1	6430810	1	37.442	ID=Ciclev10007326m.g
S01_6422664	1	6422664	1	37.442	ID=Ciclev10007670m.g
S01_7062349	1	7062349	1	39.109	ID=Ciclev10008044m.g
S01_7390266	1	7390266	1	39.109	ID=Ciclev10007331m.g
S01_7281373	1	7281373	1	39.109	ID=Ciclev10008215m.g
S01_7285538	1	7285538	1	39.109	ID=Ciclev10007544m.g
S01_7420146	1	7420146	1	39.109	ID=Ciclev10008865m.g
S01_7793731	1	7793731	1	42.51	ID=Ciclev10008296m.g
S01_8077740	1	8077740	1	45.911	ID=Ciclev10010579m.g
S01_11525469	1	11525469	1	45.911	ID=Ciclev10007325m.g
S01_15742204	1	15742204	1	45.911	ID=Ciclev10010852m.g
S01_17493202	1	17493202	1	45.911	ID=Ciclev10007392m.g
S01_12886276	1	12886276	1	45.911	ID=Ciclev10007297m.g
S01_17534460	1	17534460	1	45.911	ID=Ciclev10007828m.g
S01_16740034	1	16740034	1	45.911	ID=Ciclev10008595m.g
S01_13128413	1	13128413	1	45.911	ID=Ciclev10010588m.g
S01_14412926	1	14412926	1	45.911	ID=Ciclev10007619m.g
S01_14597210	1	14597210	1	45.911	ID=Ciclev10007863m.g
S01_18569368	1	18569368	1	45.911	ID=Ciclev10009573m.g
S01_17577385	1	17577385	1	45.911	ID=Ciclev10007821m.g
S01_19124468	1	19124468	1	52.94	ID=Ciclev10010163m.g
S01_21094771	1	21094771	1	52.94	ID=Ciclev10010479m.g
S01_20442097	1	20442097	1	52.94	ID=Ciclev10007843m.g
S01_21326252	1	21326252	1	54.61	ID=Ciclev10008777m.g
S01_21410202	1	21410202	1	56.281	ID=Ciclev10008564m.g
S01_22168276	1	22168276	1	59.679	ID=Ciclev10008020m.g
S01_22449412	1	22449412	1	59.679	ID=Ciclev10009601m.g
S01_22793349	1	22793349	1	61.349	ID=Ciclev10008176m.g
S01_23692191	1	23692191	1	64.746	ID=Ciclev10007763m.g
S01_23248268	1	23248268	1	64.746	ID=Ciclev10010386m.g
S01_23160445	1	23160445	1	64.746	ID=Ciclev10010297m.g
S01_23505119	1	23505119	1	64.746	ID=Ciclev10010623m.g
S01_23904647	1	23904647	1	64.746	ID=Ciclev10010746m.g
S01_23162531	1	23162531	1	64.746	ID=Ciclev10010287m.g
S01_24006613	1	24006613	1	64.746	ID=Ciclev10010451m.g
S01_23096037	1	23096037	1	64.746	ID=Ciclev10007927m.g
S01_23647496	1	23647496	1	64.746	ID=Ciclev10007701m.g
S01_24177031	1	24177031	1	64.746	ID=Ciclev10007234m.g
S01_23227492	1	23227492	1	64.746	ID=Ciclev10007266m.g
S01_23582210	1	23582210	1	64.746	ID=Ciclev10007571m.g
S01_23070654	1	23070654	1	65.573	ID=Ciclev10007929m.g
S01_24173645	1	24173645	1	66.4	ID=Ciclev10008211m.g
S01_24162151	1	24162151	1	66.4	ID=Ciclev10008243m.g
S01_23408448	1	23408448	1	67.227	ID=Ciclev10008774m.g
S01_23562557	1	23562557	1	68.053	ID=Ciclev10007585m.g
S01_23523652	1	23523652	1	68.053	ID=Ciclev10008896m.g
S01_23866990	1	23866990	1	68.053	ID=Ciclev10008762m.g
S01_23699596	1	23699596	1	68.053	ID=Ciclev10007552m.g
S01_23701591	1	23701591	1	68.053	ID=Ciclev10007550m.g
S01_22975910	1	22975910	1	68.053	ID=Ciclev10007536m.g
S01_23240974	1	23240974	1	68.053	ID=Ciclev10007245m.g
S01_23708566	1	23708566	1	68.053	ID=Ciclev10010552m.g
S01_23149460	1	23149460	1	68.053	ID=Ciclev10007324m.g
S01_24105561	1	24105561	1	68.053	ID=Ciclev10010631m.g
S01_24401648	1	24401648	1	71.455	ID=Ciclev10009634m.g
S01_24458398	1	24458398	1	73.131	ID=Ciclev10008392m.g
S01_24635064	1	24635064	1	73.131	ID=Ciclev10008437m.g
S01_24559362	1	24559362	1	73.131	ID=Ciclev10007546m.g
S01_24676351	1	24676351	1	73.131	ID=Ciclev10007286m.g
S01_24836083	1	24836083	1	78.317	ID=Ciclev10007377m.g
S01_25313589	1	25313589	1	79.273	ID=Ciclev10007408m.g
S01_24932532	1	24932532	1	79.977	ID=Ciclev10007512m.g
S01_24915332	1	24915332	1	79.977	ID=Ciclev10010149m.g
S01_24943635	1	24943635	1	80.52	ID=Ciclev10007964m.g
S01_25165178	1	25165178	1	81.073	ID=Ciclev10007884m.g
S01_25359037	1	25359037	1	81.626	ID=Ciclev10007999m.g
S01_25342413	1	25342413	1	81.626	ID=Ciclev10007327m.g
S01_25592968	1	25592968	1	81.626	ID=Ciclev10009756m.g
S01_25596644	1	25596644	1	81.626	ID=Ciclev10010180m.g
S01_25076057	1	25076057	1	81.626	ID=Ciclev10009053m.g
S01_25861333	1	25861333	1	85.017	ID=Ciclev10007583m.g
S01_25813500	1	25813500	1	85.017	ID=Ciclev10007427m.g
S01_26030964	1	26030964	1	85.017	ID=Ciclev10007933m.g
S01_25841049	1	25841049	1	85.017	ID=Ciclev10007931m.g
S01_25953136	1	25953136	1	85.017	ID=Ciclev10007858m.g
S01_26577190	1	26577190	1	88.408	ID=Ciclev10009162m.g
S01_26248633	1	26248633	1	88.408	ID=Ciclev10007456m.g
S01_26473578	1	26473578	1	88.408	ID=Ciclev10010203m.g
S01_26632565	1	26632565	1	88.408	ID=Ciclev10007337m.g
S01_26392831	1	26392831	1	88.408	ID=Ciclev10007292m.g
S01_26102811	1	26102811	1	88.408	ID=Ciclev10007497m.g
S01_26430186	1	26430186	1	88.408	ID=Ciclev10007853m.g
S01_27057113	1	27057113	1	91.801	ID=Ciclev10007368m.g
S01_26796388	1	26796388	1	92.554	ID=Ciclev10010390m.g
S01_26814365	1	26814365	1	93.456	ID=Ciclev10008911m.g
S01_26836555	1	26836555	1	93.456	ID=Ciclev10009750m.g
S01_26683868	1	26683868	1	93.456	ID=Ciclev10009285m.g
S01_27877252	1	27877252	1	96.847	ID=Ciclev10010602m.g
S01_27690239	1	27690239	1	96.847	ID=Ciclev10007320m.g
S01_27780071	1	27780071	1	96.847	ID=Ciclev10008947m.g
S01_28751822	1	28751822	1	96.847	ID=Ciclev10007695m.g
S01_28808018	1	28808018	1	96.847	ID=Ciclev10007895m.g
S01_28483916	1	28483916	1	96.847	ID=Ciclev10008669m.g
S01_27127855	1	27127855	1	96.847	ID=Ciclev10007405m.g
S01_28711802	1	28711802	1	96.847	ID=Ciclev10007366m.g
S01_27810869	1	27810869	1	96.847	ID=Ciclev10008554m.g
S01_28388308	1	28388308	1	96.847	ID=Ciclev10008334m.g
S01_27881940	1	27881940	1	96.847	ID=Ciclev10009180m.g
S01_28776975	1	28776975	1	96.847	ID=Ciclev10010215m.g
S01_28588106	1	28588106	1	96.847	ID=Ciclev10010403m.g
S01_27789129	1	27789129	1	96.847	ID=Ciclev10008052m.g
S01_28860413	1	28860413	1	96.847	ID=Ciclev10009248m.g
S01_27476085	1	27476085	1	96.847	ID=Ciclev10007754m.g
S01_28441149	1	28441149	1	96.847	ID=Ciclev10008754m.g
S01_27461143	1	27461143	1	96.847	ID=Ciclev10007720m.g
S02_13919863	2	13919863	2	0	ID=Ciclev10014358m.g
S02_13865031	2	13865031	2	1.923	ID=Ciclev10017541m.g
S02_13526842	2	13526842	2	3.775	ID=Ciclev10015578m.g
S02_14277094	2	14277094	2	3.775	ID=Ciclev10017154m.g
S02_19958880	2	19958880	2	3.775	ID=Ciclev10017298m.g
S02_11917966	2	11917966	2	3.775	ID=Ciclev10015537m.g
S02_11505615	2	11505615	2	4.111	ID=Ciclev10014134m.g
S02_11496293	2	11496293	2	4.455	ID=Ciclev10014459m.g
S02_11974826	2	11974826	2	4.813	ID=Ciclev10016116m.g
S02_14429648	2	14429648	2	5.166	ID=Ciclev10015755m.g
S02_13941677	2	13941677	2	5.506	ID=Ciclev10014964m.g
S02_13962229	2	13962229	2	5.506	ID=Ciclev10014385m.g
S02_13473358	2	13473358	2	5.506	ID=Ciclev10014073m.g
S02_12309555	2	12309555	2	5.506	ID=Ciclev10015638m.g
S02_11501764	2	11501764	2	5.506	ID=Ciclev10016894m.g
S02_12374769	2	12374769	2	5.506	ID=Ciclev10017128m.g
S02_11654641	2	11654641	2	5.506	ID=Ciclev10017898m.g
S02_13142135	2	13142135	2	5.506	ID=Ciclev10014024m.g
S02_12079062	2	12079062	2	5.506	ID=Ciclev10014123m.g
S02_15062079	2	15062079	2	5.506	ID=Ciclev10015471m.g
S02_11439513	2	11439513	2	6.761	ID=Ciclev10016257m.g
S02_11740976	2	11740976	2	8.123	ID=Ciclev10016552m.g
S02_15834904	2	15834904	2	10.789	ID=Ciclev10015260m.g
S02_15708409	2	15708409	2	10.789	ID=Ciclev10016311m.g
S05_810890	5	810890	2	10.789	ID=Ciclev10000238m.g
S02_15796336	2	15796336	2	10.789	ID=Ciclev10017424m.g
S02_15489574	2	15489574	2	10.789	ID=Ciclev10015280m.g
S02_11676307	2	11676307	2	10.789	ID=Ciclev10016068m.g
S02_16601833	2	16601833	2	17.733	ID=Ciclev10014998m.g
S02_16757342	2	16757342	2	17.733	ID=Ciclev10017547m.g
S02_18311109	2	18311109	2	17.733	ID=Ciclev10018370m.g
S02_11408784	2	11408784	2	19.919	ID=Ciclev10017576m.g
S02_11346390	2	11346390	2	21.676	ID=Ciclev10015375m.g
S02_22346671	2	22346671	2	27.142	ID=Ciclev10015580m.g
S02_22243091	2	22243091	2	27.142	ID=Ciclev10017567m.g
S02_21380389	2	21380389	2	27.142	ID=Ciclev10018332m.g
S02_23326915	2	23326915	2	30.718	ID=Ciclev10014979m.g
S02_23814366	2	23814366	2	30.718	ID=Ciclev10014335m.g
S02_23764607	2	23764607	2	30.718	ID=Ciclev10015492m.g
S02_24634812	2	24634812	2	30.718	ID=Ciclev10014215m.g
S02_24340423	2	24340423	2	30.718	ID=Ciclev10016448m.g
S02_23744691	2	23744691	2	30.718	ID=Ciclev10015423m.g
S02_23724853	2	23724853	2	30.718	ID=Ciclev10017035m.g
S02_24537212	2	24537212	2	30.718	ID=Ciclev10014451m.g
S02_23000965	2	23000965	2	30.718	ID=Ciclev10014919m.g
S02_23767510	2	23767510	2	31.581	ID=Ciclev10018169m.g
S02_23180705	2	23180705	2	32.458	ID=Ciclev10016668m.g
S02_23311591	2	23311591	2	32.458	ID=Ciclev10014523m.g
S02_22961670	2	22961670	2	33.047	ID=Ciclev10014865m.g
S02_23318610	2	23318610	2	33.623	ID=Ciclev10015116m.g
S02_23827583	2	23827583	2	33.623	ID=Ciclev10015049m.g
S02_24643835	2	24643835	2	34.193	ID=Ciclev10014764m.g
S02_23875278	2	23875278	2	34.193	ID=Ciclev10017917m.g
S02_23099598	2	23099598	2	34.193	ID=Ciclev10014491m.g
S02_24776834	2	24776834	2	34.193	ID=Ciclev10018131m.g
S02_23830690	2	23830690	2	34.193	ID=Ciclev10014845m.g
S02_23926699	2	23926699	2	34.193	ID=Ciclev10014902m.g
S02_23951256	2	23951256	2	34.193	ID=Ciclev10014185m.g
S02_24921581	2	24921581	2	34.193	ID=Ciclev10014351m.g
S02_23670563	2	23670563	2	34.193	ID=Ciclev10014722m.g
S02_25968411	2	25968411	2	37.765	ID=Ciclev10016497m.g
S02_25324635	2	25324635	2	37.765	ID=Ciclev10014088m.g
S02_26016410	2	26016410	2	37.765	ID=Ciclev10016106m.g
S02_26031648	2	26031648	2	37.765	ID=Ciclev10014821m.g
S02_25522536	2	25522536	2	37.765	ID=Ciclev10018269m.g
S02_25994513	2	25994513	2	38.636	ID=Ciclev10018355m.g
S02_25939194	2	25939194	2	39.506	ID=Ciclev10017221m.g
S02_26867044	2	26867044	2	39.506	ID=Ciclev10017583m.g
S02_26194484	2	26194484	2	39.506	ID=Ciclev10017924m.g
S02_25205376	2	25205376	2	40.092	ID=Ciclev10015195m.g
S02_26662822	2	26662822	2	40.678	ID=Ciclev10014296m.g
S02_25246598	2	25246598	2	41.241	ID=Ciclev10014131m.g
S02_25229549	2	25229549	2	41.241	ID=Ciclev10014094m.g
S02_25204110	2	25204110	2	42.111	ID=Ciclev10016771m.g
S02_26187437	2	26187437	2	42.981	ID=Ciclev10016207m.g
S02_25731110	2	25731110	2	42.981	ID=Ciclev10016721m.g
S02_26751710	2	26751710	2	42.981	ID=Ciclev10015253m.g
S02_26746419	2	26746419	2	42.981	ID=Ciclev10015599m.g
S02_26607799	2	26607799	2	42.981	ID=Ciclev10014588m.g
S02_26079650	2	26079650	2	42.981	ID=Ciclev10018196m.g
S02_23331182	2	23331182	2	44.506	ID=Ciclev10018308m.g
S02_27019458	2	27019458	2	44.729	ID=Ciclev10016899m.g
S02_27021612	2	27021612	2	44.729	ID=Ciclev10015171m.g
S02_27076702	2	27076702	2	46.484	ID=Ciclev10014563m.g
S02_27248185	2	27248185	2	46.537	ID=Ciclev10016265m.g
S02_27512483	2	27512483	2	48.237	ID=Ciclev10014119m.g
S02_27311016	2	27311016	2	48.237	ID=Ciclev10014030m.g
S02_27777899	2	27777899	2	49.899	ID=Ciclev10018252m.g
S02_27960995	2	27960995	2	51.75	ID=Ciclev10014737m.g
S02_28122331	2	28122331	2	52.494	ID=Ciclev10015390m.g
S02_28132267	2	28132267	2	53.491	ID=Ciclev10014287m.g
S02_28193997	2	28193997	2	53.491	ID=Ciclev10015744m.g
S02_28238175	2	28238175	2	53.491	ID=Ciclev10014079m.g
S02_27937911	2	27937911	2	57.076	ID=Ciclev10014584m.g
S02_27547541	2	27547541	2	60.66	ID=Ciclev10014686m.g
S02_27536057	2	27536057	2	60.66	ID=Ciclev10014242m.g
S02_27587556	2	27587556	2	64.233	ID=Ciclev10017324m.g
S02_27617318	2	27617318	2	64.233	ID=Ciclev10017056m.g
S02_27580871	2	27580871	2	64.233	ID=Ciclev10017466m.g
S02_27780105	2	27780105	2	64.233	ID=Ciclev10016184m.g
S02_28847004	2	28847004	2	71.657	ID=Ciclev10015330m.g
S02_28829110	2	28829110	2	71.657	ID=Ciclev10014492m.g
S02_28684016	2	28684016	2	73.416	ID=Ciclev10017575m.g
S02_28649783	2	28649783	2	73.416	ID=Ciclev10014969m.g
S02_29339277	2	29339277	2	77.01	ID=Ciclev10014294m.g
S02_29650322	2	29650322	2	82.498	ID=Ciclev10014061m.g
S02_29941930	2	29941930	2	84.261	ID=Ciclev10017803m.g
S02_30156565	2	30156565	2	84.261	ID=Ciclev10018102m.g
S02_30049717	2	30049717	2	84.261	ID=Ciclev10016394m.g
S02_29998890	2	29998890	2	84.261	ID=Ciclev10014052m.g
S02_30409168	2	30409168	2	86.017	ID=Ciclev10014844m.g
S02_30532751	2	30532751	2	86.017	ID=Ciclev10014153m.g
S02_30880581	2	30880581	2	87.772	ID=Ciclev10014116m.g
S02_30849954	2	30849954	2	87.772	ID=Ciclev10015984m.g
S02_30925228	2	30925228	2	87.772	ID=Ciclev10016127m.g
S02_32002159	2	32002159	2	95.201	ID=Ciclev10014983m.g
S02_31894488	2	31894488	2	95.201	ID=Ciclev10017760m.g
S02_32407943	2	32407943	2	96.963	ID=Ciclev10017888m.g
S02_32403306	2	32403306	2	96.963	ID=Ciclev10014789m.g
S02_33698992	2	33698992	2	100.536	ID=Ciclev10016529m.g
S02_33717023	2	33717023	2	100.536	ID=Ciclev10016200m.g
S02_33028594	2	33028594	2	100.536	ID=Ciclev10014112m.g
S02_33660810	2	33660810	2	101.324	ID=Ciclev10017171m.g
S02_33462551	2	33462551	2	102.117	ID=Ciclev10014447m.g
S02_33390529	2	33390529	2	102.273	ID=Ciclev10016152m.g
S02_33421461	2	33421461	2	102.273	ID=Ciclev10014282m.g
S02_33550301	2	33550301	2	102.605	ID=Ciclev10014136m.g
S02_33806216	2	33806216	2	105.827	ID=Ciclev10014391m.g
S02_33730114	2	33730114	2	105.827	ID=Ciclev10014023m.g
S02_33981815	2	33981815	2	108.485	ID=Ciclev10016080m.g
S02_33956055	2	33956055	2	108.485	ID=Ciclev10018204m.g
S02_33934204	2	33934204	2	108.485	ID=Ciclev10017786m.g
S02_33840055	2	33840055	2	111.14	ID=Ciclev10015064m.g
S02_33864813	2	33864813	2	111.14	ID=Ciclev10017211m.g
S02_33960945	2	33960945	2	111.14	ID=Ciclev10014227m.g
S02_34077715	2	34077715	2	116.603	ID=Ciclev10015687m.g
S02_34289652	2	34289652	2	116.603	ID=Ciclev10014476m.g
S02_34604487	2	34604487	2	118.361	ID=Ciclev10018023m.g
S02_34365146	2	34365146	2	118.361	ID=Ciclev10014155m.g
S02_34350260	2	34350260	2	118.361	ID=Ciclev10016384m.g
S02_34337528	2	34337528	2	118.361	ID=Ciclev10014603m.g
S02_34517558	2	34517558	2	119.232	ID=Ciclev10015472m.g
S02_34503018	2	34503018	2	120.101	ID=Ciclev10014430m.g
S02_34535203	2	34535203	2	120.101	ID=Ciclev10014889m.g
S02_34450478	2	34450478	2	120.101	ID=Ciclev10017841m.g
S02_34664615	2	34664615	2	121.857	ID=Ciclev10014347m.g
S02_34824839	2	34824839	2	121.857	ID=Ciclev10014753m.g
S02_34861899	2	34861899	2	123.612	ID=Ciclev10018230m.g
S02_34926170	2	34926170	2	123.612	ID=Ciclev10017980m.g
S02_34925116	2	34925116	2	123.612	ID=Ciclev10017622m.g
S02_34957343	2	34957343	2	127.186	ID=Ciclev10014315m.g
S02_35108374	2	35108374	2	128.942	ID=Ciclev10015527m.g
S02_35163647	2	35163647	2	128.942	ID=Ciclev10015817m.g
S02_35100970	2	35100970	2	128.942	ID=Ciclev10015602m.g
S02_35097221	2	35097221	2	128.942	ID=Ciclev10017950m.g
S02_35303569	2	35303569	2	130.697	ID=Ciclev10017731m.g
S02_35289407	2	35289407	2	130.697	ID=Ciclev10015200m.g
S02_35282987	2	35282987	2	130.697	ID=Ciclev10014968m.g
S02_35332869	2	35332869	2	132.46	ID=Ciclev10017854m.g
S02_35551951	2	35551951	2	134.222	ID=Ciclev10015649m.g
S02_35670206	2	35670206	2	134.222	ID=Ciclev10015792m.g
S02_36142192	2	36142192	2	134.222	ID=Ciclev10017002m.g
S02_35693839	2	35693839	2	134.222	ID=Ciclev10015934m.g
S02_35531499	2	35531499	2	134.222	ID=Ciclev10017994m.g
S02_35830901	2	35830901	2	134.222	ID=Ciclev10018181m.g
S02_35667952	2	35667952	2	134.222	ID=Ciclev10017034m.g
S02_35498766	2	35498766	2	134.222	ID=Ciclev10016599m.g
S02_35717353	2	35717353	2	134.222	ID=Ciclev10014348m.g
S02_35995975	2	35995975	2	134.222	ID=Ciclev10016754m.g
S02_35944678	2	35944678	2	134.222	ID=Ciclev10018303m.g
S02_35616512	2	35616512	2	134.77	ID=Ciclev10014418m.g
S02_35983734	2	35983734	2	135.364	ID=Ciclev10017072m.g
S02_35754781	2	35754781	2	135.959	ID=Ciclev10014814m.g
S02_35759893	2	35759893	2	135.959	ID=Ciclev10016358m.g
S02_35799976	2	35799976	2	135.959	ID=Ciclev10016018m.g
S02_35474336	2	35474336	2	136.828	ID=Ciclev10015237m.g
S02_36072477	2	36072477	2	137.699	ID=Ciclev10016401m.g
S02_36145932	2	36145932	2	137.699	ID=Ciclev10016440m.g
S02_35971444	2	35971444	2	137.699	ID=Ciclev10014811m.g
S02_35485622	2	35485622	2	137.699	ID=Ciclev10017564m.g
S02_35896884	2	35896884	2	137.699	ID=Ciclev10014770m.g
S02_36282174	2	36282174	2	139.453	ID=Ciclev10018000m.g
S02_36262971	2	36262971	2	139.453	ID=Ciclev10017669m.g
S02_36270473	2	36270473	2	139.453	ID=Ciclev10014046m.g
S02_36312793	2	36312793	2	139.453	ID=Ciclev10014935m.g
S02_36154966	2	36154966	2	139.453	ID=Ciclev10014746m.g
S02_36308023	2	36308023	2	139.471	ID=Ciclev10015031m.g
S02_36180728	2	36180728	2	141.304	ID=Ciclev10015350m.g
S02_36156903	2	36156903	2	141.304	ID=Ciclev10015898m.g
S03_4155519	3	4155519	3	0	ID=Ciclev10024278m.g
S03_4195718	3	4195718	3	0	ID=Ciclev10019499m.g
S03_4248266	3	4248266	3	0	ID=Ciclev10023901m.g
S03_4355684	3	4355684	3	0	ID=Ciclev10019793m.g
S03_3909279	3	3909279	3	0	ID=Ciclev10023569m.g
S03_4215379	3	4215379	3	0	ID=Ciclev10019547m.g
S03_4349753	3	4349753	3	0	ID=Ciclev10024401m.g
S03_4385466	3	4385466	3	0	ID=Ciclev10020324m.g
S03_4265549	3	4265549	3	0	ID=Ciclev10019526m.g
S03_4169677	3	4169677	3	0.233	ID=Ciclev10018939m.g
S03_4052980	3	4052980	3	0.469	ID=Ciclev10018616m.g
S03_4260930	3	4260930	3	0.704	ID=Ciclev10021896m.g
S03_4120128	3	4120128	3	0.94	ID=Ciclev10021889m.g
S03_4232453	3	4232453	3	1.176	ID=Ciclev10022969m.g
S03_3999541	3	3999541	3	1.411	ID=Ciclev10018456m.g
S03_3746954	3	3746954	3	1.644	ID=Ciclev10023549m.g
S03_3882107	3	3882107	3	1.644	ID=Ciclev10020762m.g
S03_5509989	3	5509989	3	3.311	ID=Ciclev10019315m.g
S03_4958204	3	4958204	3	3.311	ID=Ciclev10019492m.g
S03_5173517	3	5173517	3	3.311	ID=Ciclev10019636m.g
S03_6000973	3	6000973	3	4.138	ID=Ciclev10021834m.g
S03_4874306	3	4874306	3	4.964	ID=Ciclev10023329m.g
S03_5472652	3	5472652	3	4.964	ID=Ciclev10020835m.g
S03_5362039	3	5362039	3	4.964	ID=Ciclev10021067m.g
S03_5432747	3	5432747	3	4.964	ID=Ciclev10018818m.g
S03_4802426	3	4802426	3	4.964	ID=Ciclev10024446m.g
S03_5291501	3	5291501	3	5.783	ID=Ciclev10020964m.g
S03_5476746	3	5476746	3	6.618	ID=Ciclev10020521m.g
S03_5373803	3	5373803	3	7.453	ID=Ciclev10019196m.g
S03_5797850	3	5797850	3	8.272	ID=Ciclev10019412m.g
S03_5629524	3	5629524	3	8.272	ID=Ciclev10022924m.g
S03_5746873	3	5746873	3	8.272	ID=Ciclev10022042m.g
S03_5948446	3	5948446	3	8.823	ID=Ciclev10020462m.g
S03_5717760	3	5717760	3	9.376	ID=Ciclev10018916m.g
S03_4911827	3	4911827	3	9.922	ID=Ciclev10018937m.g
S03_5866515	3	5866515	3	9.922	ID=Ciclev10021633m.g
S03_4916014	3	4916014	3	9.922	ID=Ciclev10022085m.g
S03_5977557	3	5977557	3	9.922	ID=Ciclev10020501m.g
S03_4623429	3	4623429	3	9.922	ID=Ciclev10018424m.g
S03_5521588	3	5521588	3	9.922	ID=Ciclev10018443m.g
S03_4645064	3	4645064	3	15.099	ID=Ciclev10021747m.g
S03_6075290	3	6075290	3	15.099	ID=Ciclev10019462m.g
S03_6236749	3	6236749	3	15.099	ID=Ciclev10021953m.g
S03_6401636	3	6401636	3	18.49	ID=Ciclev10018779m.g
S03_6425353	3	6425353	3	20.158	ID=Ciclev10020346m.g
S03_6802911	3	6802911	3	21.826	ID=Ciclev10024228m.g
S03_6683775	3	6683775	3	21.826	ID=Ciclev10018726m.g
S03_6828939	3	6828939	3	21.826	ID=Ciclev10021923m.g
S03_6773376	3	6773376	3	21.826	ID=Ciclev10018489m.g
S03_6516671	3	6516671	3	21.826	ID=Ciclev10024346m.g
S03_6469216	3	6469216	3	23.486	ID=Ciclev10019738m.g
S03_7447201	3	7447201	3	25.165	ID=Ciclev10019899m.g
S03_7273659	3	7273659	3	26.832	ID=Ciclev10023301m.g
S03_7197845	3	7197845	3	26.832	ID=Ciclev10020967m.g
S03_6967330	3	6967330	3	30.223	ID=Ciclev10023269m.g
S03_6942060	3	6942060	3	30.223	ID=Ciclev10019482m.g
S03_7166302	3	7166302	3	30.223	ID=Ciclev10018833m.g
S03_7173657	3	7173657	3	30.223	ID=Ciclev10021645m.g
S03_6971017	3	6971017	3	30.223	ID=Ciclev10019148m.g
S03_7793041	3	7793041	3	31.051	ID=Ciclev10019841m.g
S03_7678721	3	7678721	3	31.879	ID=Ciclev10018667m.g
S03_7659223	3	7659223	3	31.879	ID=Ciclev10024165m.g
S03_7690588	3	7690588	3	31.879	ID=Ciclev10020924m.g
S03_7707543	3	7707543	3	31.879	ID=Ciclev10020323m.g
S03_7761724	3	7761724	3	32.291	ID=Ciclev10022528m.g
S03_7951357	3	7951357	3	32.704	ID=Ciclev10018461m.g
S03_8411647	3	8411647	3	33.112	ID=Ciclev10020292m.g
S03_8591846	3	8591846	3	33.526	ID=Ciclev10020920m.g
S03_7772462	3	7772462	3	34.353	ID=Ciclev10020317m.g
S03_8192525	3	8192525	3	35.179	ID=Ciclev10023292m.g
S03_8159176	3	8159176	3	35.179	ID=Ciclev10023312m.g
S03_8528700	3	8528700	3	35.179	ID=Ciclev10022680m.g
S03_8245409	3	8245409	3	37.709	ID=Ciclev10023536m.g
S03_7455551	3	7455551	3	37.709	ID=Ciclev10019755m.g
S03_8231667	3	8231667	3	38.96	ID=Ciclev10020540m.g
S03_10020250	3	10020250	3	40.193	ID=Ciclev10020493m.g
S03_33033456	3	33033456	3	40.193	ID=Ciclev10020160m.g
S03_31309690	3	31309690	3	40.193	ID=Ciclev10019972m.g
S03_33158488	3	33158488	3	40.193	ID=Ciclev10019496m.g
S03_33709983	3	33709983	3	40.193	ID=Ciclev10023366m.g
S03_10151394	3	10151394	3	40.193	ID=Ciclev10023109m.g
S03_9717684	3	9717684	3	40.193	ID=Ciclev10019473m.g
S03_32752310	3	32752310	3	40.193	ID=Ciclev10019208m.g
S03_32545358	3	32545358	3	40.193	ID=Ciclev10023690m.g
S03_10022579	3	10022579	3	41.02	ID=Ciclev10018859m.g
S03_8843388	3	8843388	3	41.847	ID=Ciclev10019201m.g
S03_9028425	3	9028425	3	41.847	ID=Ciclev10018692m.g
S03_31352902	3	31352902	3	41.847	ID=Ciclev10021151m.g
S03_31166382	3	31166382	3	41.847	ID=Ciclev10018721m.g
S03_9370860	3	9370860	3	41.847	ID=Ciclev10018539m.g
S03_32715305	3	32715305	3	45.238	ID=Ciclev10019454m.g
S03_33746645	3	33746645	3	45.238	ID=Ciclev10023053m.g
S03_34002061	3	34002061	3	45.238	ID=Ciclev10023387m.g
S03_31486568	3	31486568	3	46.065	ID=Ciclev10024261m.g
S03_9719851	3	9719851	3	46.892	ID=Ciclev10019417m.g
S03_32798242	3	32798242	3	46.892	ID=Ciclev10020490m.g
S03_8642675	3	8642675	3	46.892	ID=Ciclev10019790m.g
S03_9744114	3	9744114	3	46.892	ID=Ciclev10022919m.g
S03_9747315	3	9747315	3	46.892	ID=Ciclev10022419m.g
S03_32989072	3	32989072	3	48.558	ID=Ciclev10020396m.g
S03_10472142	3	10472142	3	50.229	ID=Ciclev10022203m.g
S03_30875349	3	30875349	3	50.229	ID=Ciclev10021488m.g
S03_30508384	3	30508384	3	50.229	ID=Ciclev10023422m.g
S03_30580994	3	30580994	3	50.229	ID=Ciclev10020825m.g
S03_29541940	3	29541940	3	50.229	ID=Ciclev10019766m.g
S03_30520145	3	30520145	3	50.229	ID=Ciclev10019362m.g
S03_30955763	3	30955763	3	51.056	ID=Ciclev10018908m.g
S03_34183984	3	34183984	3	51.883	ID=Ciclev10023261m.g
S03_10604769	3	10604769	3	51.883	ID=Ciclev10023629m.g
S03_29175158	3	29175158	3	51.883	ID=Ciclev10020632m.g
S03_10252645	3	10252645	3	51.883	ID=Ciclev10018793m.g
S03_29135792	3	29135792	3	51.883	ID=Ciclev10022266m.g
S03_29879990	3	29879990	3	52.709	ID=Ciclev10023702m.g
S03_29559508	3	29559508	3	53.536	ID=Ciclev10018666m.g
S03_29382932	3	29382932	3	53.536	ID=Ciclev10019003m.g
S03_10431700	3	10431700	3	53.536	ID=Ciclev10020181m.g
S03_11635322	3	11635322	3	58.713	ID=Ciclev10019884m.g
S03_12793287	3	12793287	3	58.713	ID=Ciclev10020083m.g
S03_11501031	3	11501031	3	58.713	ID=Ciclev10018464m.g
S03_11273448	3	11273448	3	58.713	ID=Ciclev10018785m.g
S03_11399770	3	11399770	3	58.713	ID=Ciclev10019376m.g
S03_12415501	3	12415501	3	62.106	ID=Ciclev10021983m.g
S03_12221833	3	12221833	3	62.106	ID=Ciclev10020013m.g
S03_12835728	3	12835728	3	62.87	ID=Ciclev10023517m.g
S03_12823367	3	12823367	3	63.76	ID=Ciclev10021946m.g
S03_11663181	3	11663181	3	63.76	ID=Ciclev10020388m.g
S03_11178819	3	11178819	3	63.76	ID=Ciclev10021271m.g
S03_11412158	3	11412158	3	63.76	ID=Ciclev10018947m.g
S03_19267026	3	19267026	3	63.76	ID=Ciclev10021647m.g
S03_20743439	3	20743439	3	67.151	ID=Ciclev10020750m.g
S03_19330786	3	19330786	3	67.151	ID=Ciclev10023970m.g
S03_19321766	3	19321766	3	67.151	ID=Ciclev10021509m.g
S03_20917155	3	20917155	3	67.705	ID=Ciclev10018931m.g
S03_17749069	3	17749069	3	68.254	ID=Ciclev10018888m.g
S03_13227497	3	13227497	3	68.801	ID=Ciclev10018879m.g
S03_18731963	3	18731963	3	68.801	ID=Ciclev10021799m.g
S03_12708054	3	12708054	3	68.801	ID=Ciclev10019244m.g
S03_15178172	3	15178172	3	68.801	ID=Ciclev10019405m.g
S03_19286641	3	19286641	3	68.801	ID=Ciclev10023501m.g
S03_19310760	3	19310760	3	68.801	ID=Ciclev10019695m.g
S03_13582782	3	13582782	3	68.801	ID=Ciclev10019177m.g
S03_20672495	3	20672495	3	68.801	ID=Ciclev10020938m.g
S03_20688460	3	20688460	3	68.801	ID=Ciclev10021347m.g
S03_13812636	3	13812636	3	68.801	ID=Ciclev10022215m.g
S03_19793836	3	19793836	3	68.801	ID=Ciclev10020303m.g
S03_20872644	3	20872644	3	68.801	ID=Ciclev10020602m.g
S03_17457150	3	17457150	3	68.801	ID=Ciclev10023627m.g
S03_16916833	3	16916833	3	68.801	ID=Ciclev10024534m.g
S03_16436685	3	16436685	3	68.801	ID=Ciclev10018592m.g
S03_13829187	3	13829187	3	68.801	ID=Ciclev10018632m.g
S03_21814685	3	21814685	3	70.469	ID=Ciclev10024358m.g
S03_23735428	3	23735428	3	72.137	ID=Ciclev10021154m.g
S03_23760820	3	23760820	3	72.137	ID=Ciclev10024319m.g
S03_23034923	3	23034923	3	72.137	ID=Ciclev10021219m.g
S03_22789302	3	22789302	3	72.137	ID=Ciclev10018754m.g
S03_23316081	3	23316081	3	72.137	ID=Ciclev10022438m.g
S03_25543237	3	25543237	3	73.805	ID=Ciclev10018540m.g
S03_25499142	3	25499142	3	73.805	ID=Ciclev10023260m.g
S03_28407513	3	28407513	3	74.25	ID=Ciclev10020481m.g
S03_36097117	3	36097117	3	75.462	ID=Ciclev10022339m.g
S03_27953094	3	27953094	3	75.462	ID=Ciclev10024591m.g
S03_27799994	3	27799994	3	75.462	ID=Ciclev10023071m.g
S03_28021795	3	28021795	3	75.462	ID=Ciclev10024300m.g
S03_25635398	3	25635398	3	75.462	ID=Ciclev10018897m.g
S03_28332755	3	28332755	3	75.462	ID=Ciclev10018900m.g
S02_34045417	2	34045417	3	75.462	ID=Ciclev10014703m.g
S03_25660242	3	25660242	3	75.462	ID=Ciclev10024293m.g
S03_28686570	3	28686570	3	75.462	ID=Ciclev10018758m.g
S03_36008533	3	36008533	3	75.462	ID=Ciclev10020253m.g
S03_36263160	3	36263160	3	75.462	ID=Ciclev10024276m.g
S03_36834839	3	36834839	3	77.129	ID=Ciclev10022050m.g
S03_36705043	3	36705043	3	77.129	ID=Ciclev10018957m.g
S03_37489477	3	37489477	3	78.797	ID=Ciclev10023730m.g
S03_37466354	3	37466354	3	78.797	ID=Ciclev10023352m.g
S03_37846161	3	37846161	3	80.465	ID=Ciclev10023535m.g
S03_38260648	3	38260648	3	80.739	ID=Ciclev10024419m.g
S03_38308043	3	38308043	3	81.432	ID=Ciclev10022579m.g
S03_38117144	3	38117144	3	82.116	ID=Ciclev10019615m.g
S03_38331144	3	38331144	3	82.116	ID=Ciclev10022280m.g
S03_37899482	3	37899482	3	82.116	ID=Ciclev10021850m.g
S03_38604290	3	38604290	3	83.049	ID=Ciclev10018680m.g
S03_39038033	3	39038033	3	83.77	ID=Ciclev10023340m.g
S03_38526495	3	38526495	3	83.77	ID=Ciclev10019579m.g
S03_38471674	3	38471674	3	83.77	ID=Ciclev10018556m.g
S03_39076102	3	39076102	3	83.77	ID=Ciclev10020116m.g
S03_38552912	3	38552912	3	83.77	ID=Ciclev10018533m.g
S03_39352413	3	39352413	3	85.437	ID=Ciclev10020134m.g
S03_39658597	3	39658597	3	86.267	ID=Ciclev10021187m.g
S03_39761024	3	39761024	3	87.09	ID=Ciclev10022381m.g
S03_39706281	3	39706281	3	87.09	ID=Ciclev10018740m.g
S03_39622153	3	39622153	3	87.09	ID=Ciclev10021532m.g
S03_39644380	3	39644380	3	87.09	ID=Ciclev10019670m.g
S03_39402780	3	39402780	3	87.09	ID=Ciclev10024181m.g
S03_39407544	3	39407544	3	87.09	ID=Ciclev10019508m.g
S03_39772257	3	39772257	3	87.09	ID=Ciclev10018764m.g
S03_40116521	3	40116521	3	87.09	ID=Ciclev10021522m.g
S03_39475113	3	39475113	3	87.09	ID=Ciclev10018676m.g
S03_39756508	3	39756508	3	87.09	ID=Ciclev10018854m.g
S03_40110323	3	40110323	3	87.09	ID=Ciclev10021732m.g
S03_40965053	3	40965053	3	88.759	ID=Ciclev10020717m.g
S03_40254614	3	40254614	3	88.759	ID=Ciclev10019808m.g
S03_40758400	3	40758400	3	88.759	ID=Ciclev10020331m.g
S03_40747514	3	40747514	3	88.759	ID=Ciclev10022368m.g
S03_40505014	3	40505014	3	88.759	ID=Ciclev10018711m.g
S03_40242542	3	40242542	3	88.759	ID=Ciclev10020928m.g
S03_41291892	3	41291892	3	91.285	ID=Ciclev10021582m.g
S03_41570370	3	41570370	3	93.811	ID=Ciclev10018636m.g
S03_41858577	3	41858577	3	93.811	ID=Ciclev10019408m.g
S03_41819607	3	41819607	3	93.811	ID=Ciclev10020854m.g
S03_41482920	3	41482920	3	93.811	ID=Ciclev10023255m.g
S03_41871325	3	41871325	3	94.638	ID=Ciclev10020145m.g
S03_41793995	3	41793995	3	95.464	ID=Ciclev10019589m.g
S03_41893771	3	41893771	3	95.464	ID=Ciclev10019321m.g
S03_41976275	3	41976275	3	97.131	ID=Ciclev10021118m.g
S03_41923940	3	41923940	3	97.131	ID=Ciclev10019872m.g
S03_41990192	3	41990192	3	97.956	ID=Ciclev10021072m.g
S03_41884276	3	41884276	3	98.785	ID=Ciclev10020438m.g
S03_42073495	3	42073495	3	99.615	ID=Ciclev10021457m.g
S03_41768131	3	41768131	3	100.44	ID=Ciclev10021843m.g
S03_41787380	3	41787380	3	100.44	ID=Ciclev10020215m.g
S03_41785313	3	41785313	3	100.44	ID=Ciclev10019878m.g
S03_42552591	3	42552591	3	108.569	ID=Ciclev10019039m.g
S03_42152970	3	42152970	3	108.571	ID=Ciclev10020691m.g
S03_42129496	3	42129496	3	108.571	ID=Ciclev10021891m.g
S03_42373441	3	42373441	3	114.522	ID=Ciclev10022827m.g
S03_42499788	3	42499788	3	114.522	ID=Ciclev10024546m.g
S03_42476371	3	42476371	3	114.522	ID=Ciclev10018522m.g
S03_42271689	3	42271689	3	114.522	ID=Ciclev10018446m.g
S03_42163215	3	42163215	3	116.939	ID=Ciclev10019411m.g
S03_42626530	3	42626530	3	120.068	ID=Ciclev10018498m.g
S03_42641966	3	42641966	3	122.699	ID=Ciclev10020728m.g
S03_42637792	3	42637792	3	122.699	ID=Ciclev10019392m.g
S03_42802167	3	42802167	3	128.179	ID=Ciclev10018935m.g
S03_42725294	3	42725294	3	128.179	ID=Ciclev10018480m.g
S03_42781107	3	42781107	3	128.179	ID=Ciclev10018910m.g
S03_42742998	3	42742998	3	128.179	ID=Ciclev10024404m.g
S03_42760478	3	42760478	3	128.179	ID=Ciclev10020620m.g
S03_43055475	3	43055475	3	133.356	ID=Ciclev10020365m.g
S03_42841000	3	42841000	3	133.356	ID=Ciclev10019299m.g
S03_42817208	3	42817208	3	133.356	ID=Ciclev10019675m.g
S03_43436155	3	43436155	3	136.749	ID=Ciclev10023734m.g
S03_44498996	3	44498996	3	138.417	ID=Ciclev10018523m.g
S03_44413589	3	44413589	3	138.417	ID=Ciclev10022807m.g
S03_43377174	3	43377174	3	140.085	ID=Ciclev10023554m.g
S03_44984204	3	44984204	3	140.085	ID=Ciclev10018445m.g
S03_42959920	3	42959920	3	140.085	ID=Ciclev10021437m.g
S03_43207597	3	43207597	3	140.085	ID=Ciclev10024489m.g
S03_44609642	3	44609642	3	140.085	ID=Ciclev10023667m.g
S03_44961280	3	44961280	3	140.085	ID=Ciclev10019732m.g
S03_43421033	3	43421033	3	140.085	ID=Ciclev10021699m.g
S03_43001220	3	43001220	3	140.085	ID=Ciclev10018639m.g
S03_44891319	3	44891319	3	143.476	ID=Ciclev10020955m.g
S03_43156285	3	43156285	3	143.476	ID=Ciclev10024202m.g
S03_45721553	3	45721553	3	143.476	ID=Ciclev10021143m.g
S03_45217646	3	45217646	3	143.476	ID=Ciclev10021328m.g
S03_45139752	3	45139752	3	143.476	ID=Ciclev10018791m.g
S03_45639281	3	45639281	3	143.476	ID=Ciclev10018516m.g
S03_45426454	3	45426454	3	143.476	ID=Ciclev10018729m.g
S03_42979085	3	42979085	3	143.476	ID=Ciclev10021908m.g
S03_43544007	3	43544007	3	146.867	ID=Ciclev10024363m.g
S03_44915196	3	44915196	3	146.867	ID=Ciclev10019581m.g
S03_44090696	3	44090696	3	148.538	ID=Ciclev10018426m.g
S03_44273052	3	44273052	3	150.209	ID=Ciclev10018988m.g
S03_42968609	3	42968609	3	150.209	ID=Ciclev10018896m.g
S03_44318983	3	44318983	3	150.209	ID=Ciclev10022764m.g
S03_43130500	3	43130500	3	153.602	ID=Ciclev10018992m.g
S03_42884244	3	42884244	3	153.602	ID=Ciclev10023136m.g
S03_44932539	3	44932539	3	153.602	ID=Ciclev10022724m.g
S03_43699487	3	43699487	3	153.602	ID=Ciclev10023822m.g
S03_42929666	3	42929666	3	153.602	ID=Ciclev10019502m.g
S03_44125885	3	44125885	3	153.602	ID=Ciclev10019959m.g
S03_43491541	3	43491541	3	153.602	ID=Ciclev10023393m.g
S03_44943432	3	44943432	3	154.408	ID=Ciclev10022630m.g
S03_44632014	3	44632014	3	155.235	ID=Ciclev10019118m.g
S03_44388628	3	44388628	3	156.082	ID=Ciclev10023775m.g
S03_43628658	3	43628658	3	157.343	ID=Ciclev10023342m.g
S03_45026377	3	45026377	3	158.578	ID=Ciclev10019923m.g
S03_44166201	3	44166201	3	158.578	ID=Ciclev10023714m.g
S03_44853658	3	44853658	3	158.578	ID=Ciclev10018517m.g
S03_44006569	3	44006569	3	158.578	ID=Ciclev10020513m.g
S03_42951144	3	42951144	3	158.578	ID=Ciclev10018866m.g
S03_45000524	3	45000524	3	158.578	ID=Ciclev10019778m.g
S03_44604997	3	44604997	3	159.792	ID=Ciclev10019771m.g
S03_45477567	3	45477567	3	161.063	ID=Ciclev10023420m.g
S03_45418716	3	45418716	3	163.594	ID=Ciclev10020375m.g
S03_45299812	3	45299812	3	163.594	ID=Ciclev10022800m.g
S03_45317791	3	45317791	3	163.594	ID=Ciclev10023989m.g
S03_43635432	3	43635432	3	163.594	ID=Ciclev10024066m.g
S03_45244789	3	45244789	3	163.594	ID=Ciclev10022531m.g
S03_45888488	3	45888488	3	168.771	ID=Ciclev10021907m.g
S03_46168747	3	46168747	3	168.771	ID=Ciclev10022679m.g
S03_46006205	3	46006205	3	168.771	ID=Ciclev10019602m.g
S03_45895468	3	45895468	3	168.771	ID=Ciclev10023029m.g
S01_7850625	1	7850625	3	168.771	ID=Ciclev10008287m.g
S03_45912922	3	45912922	3	168.771	ID=Ciclev10024146m.g
S03_46729276	3	46729276	3	175.783	ID=Ciclev10019038m.g
S03_46959072	3	46959072	3	177.992	ID=Ciclev10018861m.g
S03_47087968	3	47087968	3	180.195	ID=Ciclev10018812m.g
S03_47293831	3	47293831	3	182.032	ID=Ciclev10020859m.g
S03_47151560	3	47151560	3	182.032	ID=Ciclev10019510m.g
S03_47321454	3	47321454	3	187.772	ID=Ciclev10020349m.g
S03_47477496	3	47477496	3	187.772	ID=Ciclev10018964m.g
S03_47667620	3	47667620	3	195.805	ID=Ciclev10019596m.g
S03_48013739	3	48013739	3	199.467	ID=Ciclev10019982m.g
S03_47676344	3	47676344	3	199.467	ID=Ciclev10019421m.g
S03_48587204	3	48587204	3	205.251	ID=Ciclev10020434m.g
S03_48519181	3	48519181	3	205.251	ID=Ciclev10018596m.g
S03_48928324	3	48928324	3	208.265	ID=Ciclev10019660m.g
S03_49009134	3	49009134	3	208.265	ID=Ciclev10018441m.g
S03_48841205	3	48841205	3	208.265	ID=Ciclev10022320m.g
S03_49207236	3	49207236	3	211.283	ID=Ciclev10021613m.g
S03_49221085	3	49221085	3	212.225	ID=Ciclev10023577m.g
S03_49242176	3	49242176	3	213.254	ID=Ciclev10019380m.g
S03_49363546	3	49363546	3	215.844	ID=Ciclev10022007m.g
S03_49369084	3	49369084	3	220.088	ID=Ciclev10019530m.g
S03_49597261	3	49597261	3	222.162	ID=Ciclev10023337m.g
S03_49634764	3	49634764	3	222.162	ID=Ciclev10022618m.g
S03_49660532	3	49660532	3	222.162	ID=Ciclev10018796m.g
S03_49664864	3	49664864	3	222.162	ID=Ciclev10024070m.g
S03_49863684	3	49863684	3	226.074	ID=Ciclev10023651m.g
S03_50039719	3	50039719	3	230.006	ID=Ciclev10020384m.g
S03_50499940	3	50499940	3	236.002	ID=Ciclev10024143m.g
S03_50643021	3	50643021	3	237.675	ID=Ciclev10019814m.g
S03_50919459	3	50919459	3	237.675	ID=Ciclev10022762m.g
S04_15280165	4	15280165	4	0	ID=Ciclev10031282m.g
S04_16048577	4	16048577	4	3.51	ID=Ciclev10032012m.g
S04_16752887	4	16752887	4	3.51	ID=Ciclev10031946m.g
S04_17043690	4	17043690	4	10.665	ID=Ciclev10030490m.g
S04_17190472	4	17190472	4	10.665	ID=Ciclev10030475m.g
S04_17683563	4	17683563	4	10.665	ID=Ciclev10031558m.g
S04_17795051	4	17795051	4	12.335	ID=Ciclev10033437m.g
S04_17965387	4	17965387	4	14.007	ID=Ciclev10031531m.g
S04_18195910	4	18195910	4	14.007	ID=Ciclev10030747m.g
S04_18659002	4	18659002	4	16.534	ID=Ciclev10033525m.g
S04_18620098	4	18620098	4	16.534	ID=Ciclev10030817m.g
S04_19555531	4	19555531	4	19.057	ID=Ciclev10031364m.g
S04_19057075	4	19057075	4	19.057	ID=Ciclev10030859m.g
S04_19587416	4	19587416	4	19.057	ID=Ciclev10030710m.g
S04_19461327	4	19461327	4	19.057	ID=Ciclev10031654m.g
S04_19140157	4	19140157	4	19.057	ID=Ciclev10033734m.g
S04_19546195	4	19546195	4	19.057	ID=Ciclev10031322m.g
S04_19415304	4	19415304	4	24.234	ID=Ciclev10033991m.g
S04_19432872	4	19432872	4	24.234	ID=Ciclev10030866m.g
S04_18962402	4	18962402	4	24.234	ID=Ciclev10033897m.g
S04_18956001	4	18956001	4	24.234	ID=Ciclev10032094m.g
S04_18782360	4	18782360	4	24.234	ID=Ciclev10031672m.g
S04_19092661	4	19092661	4	27.614	ID=Ciclev10032493m.g
S04_19410098	4	19410098	4	27.614	ID=Ciclev10031060m.g
S04_19693252	4	19693252	4	31.038	ID=Ciclev10033721m.g
S04_20723525	4	20723525	4	36.238	ID=Ciclev10033781m.g
S04_20664534	4	20664534	4	36.238	ID=Ciclev10033488m.g
S04_20765827	4	20765827	4	36.238	ID=Ciclev10032483m.g
S04_21173506	4	21173506	4	36.238	ID=Ciclev10031391m.g
S04_20856866	4	20856866	4	36.238	ID=Ciclev10031472m.g
S04_20906255	4	20906255	4	36.238	ID=Ciclev10030493m.g
S04_20943371	4	20943371	4	36.238	ID=Ciclev10032794m.g
S04_19819083	4	19819083	4	41.415	ID=Ciclev10030538m.g
S04_20500576	4	20500576	4	41.415	ID=Ciclev10030646m.g
S04_20253520	4	20253520	4	41.415	ID=Ciclev10031372m.g
S04_19762691	4	19762691	4	43.082	ID=Ciclev10032187m.g
S04_20155595	4	20155595	4	43.082	ID=Ciclev10031053m.g
S04_20591816	4	20591816	4	43.65	ID=Ciclev10033741m.g
S04_20124471	4	20124471	4	44.824	ID=Ciclev10032464m.g
S04_21166240	4	21166240	4	46.407	ID=Ciclev10031133m.g
S04_20675734	4	20675734	4	47.193	ID=Ciclev10031132m.g
S04_19785933	4	19785933	4	48.061	ID=Ciclev10031108m.g
S04_20686880	4	20686880	4	48.861	ID=Ciclev10033727m.g
S04_21196858	4	21196858	4	49.716	ID=Ciclev10030951m.g
S04_21288594	4	21288594	4	51.385	ID=Ciclev10031713m.g
S04_21362395	4	21362395	4	53.055	ID=Ciclev10031347m.g
S04_21629627	4	21629627	4	56.45	ID=Ciclev10031257m.g
S04_21423112	4	21423112	4	56.45	ID=Ciclev10030531m.g
S04_21438313	4	21438313	4	56.45	ID=Ciclev10030842m.g
S04_21502932	4	21502932	4	56.45	ID=Ciclev10030770m.g
S04_21605197	4	21605197	4	56.45	ID=Ciclev10033456m.g
S04_21717379	4	21717379	4	56.45	ID=Ciclev10031490m.g
S04_21562748	4	21562748	4	56.45	ID=Ciclev10030774m.g
S04_21572140	4	21572140	4	56.45	ID=Ciclev10030830m.g
S04_21521355	4	21521355	4	56.45	ID=Ciclev10031330m.g
S04_21647757	4	21647757	4	56.45	ID=Ciclev10030504m.g
S04_22142420	4	22142420	4	60.726	ID=Ciclev10033962m.g
S04_22134733	4	22134733	4	60.726	ID=Ciclev10031753m.g
S04_22151820	4	22151820	4	65.003	ID=Ciclev10030964m.g
S04_22120298	4	22120298	4	65.003	ID=Ciclev10031235m.g
S04_21836804	4	21836804	4	65.003	ID=Ciclev10031171m.g
S04_22147167	4	22147167	4	65.003	ID=Ciclev10033904m.g
S04_22409195	4	22409195	4	65.003	ID=Ciclev10030499m.g
S04_21807466	4	21807466	4	65.829	ID=Ciclev10033895m.g
S04_21791171	4	21791171	4	66.656	ID=Ciclev10030479m.g
S04_21925669	4	21925669	4	66.656	ID=Ciclev10031545m.g
S04_22025865	4	22025865	4	66.656	ID=Ciclev10033591m.g
S04_21798490	4	21798490	4	68.347	ID=Ciclev10032277m.g
S04_22369695	4	22369695	4	69.993	ID=Ciclev10033774m.g
S04_22347681	4	22347681	4	69.993	ID=Ciclev10030794m.g
S04_22264059	4	22264059	4	69.993	ID=Ciclev10031735m.g
S04_21832101	4	21832101	4	72.525	ID=Ciclev10032789m.g
S04_23150759	4	23150759	4	75.058	ID=Ciclev10032093m.g
S04_23053737	4	23053737	4	75.058	ID=Ciclev10032870m.g
S04_22770095	4	22770095	4	80.235	ID=Ciclev10033161m.g
S04_22501366	4	22501366	4	80.235	ID=Ciclev10031561m.g
S04_22803505	4	22803505	4	80.235	ID=Ciclev10031155m.g
S04_22842390	4	22842390	4	80.235	ID=Ciclev10030755m.g
S04_22636864	4	22636864	4	80.235	ID=Ciclev10032958m.g
S04_22487380	4	22487380	4	80.235	ID=Ciclev10030967m.g
S04_22720944	4	22720944	4	80.235	ID=Ciclev10033010m.g
S04_22642756	4	22642756	4	80.235	ID=Ciclev10033635m.g
S04_22416886	4	22416886	4	83.626	ID=Ciclev10032926m.g
S04_23209047	4	23209047	4	83.626	ID=Ciclev10030507m.g
S04_23205172	4	23205172	4	83.626	ID=Ciclev10030551m.g
S04_22566610	4	22566610	4	83.626	ID=Ciclev10030577m.g
S04_22543073	4	22543073	4	83.626	ID=Ciclev10033714m.g
S04_22628126	4	22628126	4	83.626	ID=Ciclev10031097m.g
S04_23251177	4	23251177	4	85.295	ID=Ciclev10032274m.g
S04_23612800	4	23612800	4	88.688	ID=Ciclev10033863m.g
S04_23572907	4	23572907	4	88.688	ID=Ciclev10032366m.g
S04_23631318	4	23631318	4	88.688	ID=Ciclev10031221m.g
S04_23541904	4	23541904	4	88.688	ID=Ciclev10031752m.g
S04_23505719	4	23505719	4	88.688	ID=Ciclev10032229m.g
S04_23610591	4	23610591	4	88.688	ID=Ciclev10033729m.g
S04_23528878	4	23528878	4	89.166	ID=Ciclev10031067m.g
S04_23452413	4	23452413	4	89.751	ID=Ciclev10031519m.g
S04_23311348	4	23311348	4	90.338	ID=Ciclev10030537m.g
S04_23375972	4	23375972	4	90.338	ID=Ciclev10033337m.g
S04_23636292	4	23636292	4	90.338	ID=Ciclev10033589m.g
S04_23784806	4	23784806	4	92.006	ID=Ciclev10033698m.g
S04_23883742	4	23883742	4	92.006	ID=Ciclev10030768m.g
S04_23845947	4	23845947	4	92.006	ID=Ciclev10030989m.g
S04_23657593	4	23657593	4	92.006	ID=Ciclev10033827m.g
S04_23804558	4	23804558	4	92.006	ID=Ciclev10032771m.g
S04_23791107	4	23791107	4	92.006	ID=Ciclev10031757m.g
S04_24484268	4	24484268	4	97.188	ID=Ciclev10033431m.g
S04_24616043	4	24616043	4	97.188	ID=Ciclev10032244m.g
S04_24280396	4	24280396	4	100.237	ID=Ciclev10030574m.g
S04_24752171	4	24752171	4	100.566	ID=Ciclev10031481m.g
S04_24688316	4	24688316	4	100.566	ID=Ciclev10031389m.g
S04_24151110	4	24151110	4	101.395	ID=Ciclev10031585m.g
S04_24653776	4	24653776	4	102.222	ID=Ciclev10030698m.g
S04_24067578	4	24067578	4	103.209	ID=Ciclev10030675m.g
S04_24780990	4	24780990	4	103.878	ID=Ciclev10030586m.g
S04_24380432	4	24380432	4	103.878	ID=Ciclev10033760m.g
S04_24789899	4	24789899	4	103.878	ID=Ciclev10030728m.g
S04_24196444	4	24196444	4	104.36	ID=Ciclev10030593m.g
S04_24205637	4	24205637	4	104.872	ID=Ciclev10032989m.g
S04_24646836	4	24646836	4	105.529	ID=Ciclev10033890m.g
S04_25075183	4	25075183	4	107.199	ID=Ciclev10033914m.g
S04_25548282	4	25548282	4	110.005	ID=Ciclev10033633m.g
S04_25431316	4	25431316	4	110.621	ID=Ciclev10030505m.g
S04_25271083	4	25271083	4	111.728	ID=Ciclev10030862m.g
S04_25359904	4	25359904	4	111.952	ID=Ciclev10031826m.g
S04_25356236	4	25356236	4	112.128	ID=Ciclev10031320m.g
S04_25232278	4	25232278	4	112.302	ID=Ciclev10033853m.g
S04_25171733	4	25171733	4	112.302	ID=Ciclev10033110m.g
S05_8576511	5	8576511	5	0	ID=Ciclev10000273m.g
S05_20933393	5	20933393	5	0	ID=Ciclev10002295m.g
S05_1475226	5	1475226	5	5.268	ID=Ciclev10002114m.g
S05_598285	5	598285	5	5.268	ID=Ciclev10000109m.g
S05_5089919	5	5089919	5	6.936	ID=Ciclev10000637m.g
S05_21186048	5	21186048	5	8.604	ID=Ciclev10003744m.g
S05_8532614	5	8532614	5	8.604	ID=Ciclev10000069m.g
S05_24048789	5	24048789	5	8.604	ID=Ciclev10001893m.g
S05_24071319	5	24071319	5	8.604	ID=Ciclev10000705m.g
S05_24375523	5	24375523	5	10.276	ID=Ciclev10003896m.g
S05_24807109	5	24807109	5	11.95	ID=Ciclev10002116m.g
S05_6001789	5	6001789	5	14.486	ID=Ciclev10000233m.g
S05_5838380	5	5838380	5	17.017	ID=Ciclev10003600m.g
S05_20084654	5	20084654	5	17.533	ID=Ciclev10000307m.g
S05_6483028	5	6483028	5	18.673	ID=Ciclev10000702m.g
S05_5333222	5	5333222	5	18.673	ID=Ciclev10000672m.g
S05_21811056	5	21811056	5	18.673	ID=Ciclev10000710m.g
S05_19186786	5	19186786	5	18.673	ID=Ciclev10000289m.g
S05_263109	5	263109	5	18.673	ID=Ciclev10002464m.g
S05_19118969	5	19118969	5	18.673	ID=Ciclev10001436m.g
S05_19514582	5	19514582	5	18.673	ID=Ciclev10002548m.g
S05_3514231	5	3514231	5	19.5	ID=Ciclev10003972m.g
S05_24110819	5	24110819	5	20.327	ID=Ciclev10000617m.g
S05_21524934	5	21524934	5	20.327	ID=Ciclev10001212m.g
S05_23725104	5	23725104	5	20.327	ID=Ciclev10000349m.g
S05_6727126	5	6727126	5	22.55	ID=Ciclev10001528m.g
S05_19107264	5	19107264	5	27.137	ID=Ciclev10000577m.g
S05_5288458	5	5288458	5	27.137	ID=Ciclev10000066m.g
S05_22272118	5	22272118	5	27.137	ID=Ciclev10000572m.g
S05_8643917	5	8643917	5	27.137	ID=Ciclev10000024m.g
S05_6075042	5	6075042	5	28.104	ID=Ciclev10000976m.g
S05_21581252	5	21581252	5	28.791	ID=Ciclev10002554m.g
S05_6736415	5	6736415	5	30.459	ID=Ciclev10003667m.g
S05_19785467	5	19785467	5	32.126	ID=Ciclev10002513m.g
S05_24797361	5	24797361	5	33.795	ID=Ciclev10001613m.g
S05_25798577	5	25798577	5	37.195	ID=Ciclev10003116m.g
S05_25966816	5	25966816	5	40.596	ID=Ciclev10000735m.g
S05_26336326	5	26336326	5	42.266	ID=Ciclev10003287m.g
S05_25862618	5	25862618	5	43.935	ID=Ciclev10003885m.g
S05_25843160	5	25843160	5	44.595	ID=Ciclev10000944m.g
S05_26489602	5	26489602	5	44.926	ID=Ciclev10003268m.g
S05_26006828	5	26006828	5	45.586	ID=Ciclev10000690m.g
S05_26991841	5	26991841	5	47.253	ID=Ciclev10001973m.g
S05_27123907	5	27123907	5	47.253	ID=Ciclev10003996m.g
S05_28856925	5	28856925	5	51.841	ID=Ciclev10000274m.g
S05_30642977	5	30642977	5	54.067	ID=Ciclev10000168m.g
S05_30769892	5	30769892	5	54.067	ID=Ciclev10000353m.g
S05_30628139	5	30628139	5	54.067	ID=Ciclev10000082m.g
S05_30803372	5	30803372	5	57.458	ID=Ciclev10001724m.g
S05_31431890	5	31431890	5	57.458	ID=Ciclev10000394m.g
S05_30818937	5	30818937	5	57.458	ID=Ciclev10000367m.g
S05_27376509	5	27376509	5	60.85	ID=Ciclev10003137m.g
S05_27147402	5	27147402	5	60.85	ID=Ciclev10002550m.g
S05_29429471	5	29429471	5	62.518	ID=Ciclev10000014m.g
S05_28836044	5	28836044	5	65.909	ID=Ciclev10003490m.g
S05_28882827	5	28882827	5	65.909	ID=Ciclev10002930m.g
S05_29303781	5	29303781	5	65.909	ID=Ciclev10002780m.g
S05_29126569	5	29126569	5	70.909	ID=Ciclev10000893m.g
S05_29484586	5	29484586	5	70.909	ID=Ciclev10001524m.g
S05_31340973	5	31340973	5	71.069	ID=Ciclev10003196m.g
S05_31870737	5	31870737	5	71.069	ID=Ciclev10000365m.g
S05_31883435	5	31883435	5	71.069	ID=Ciclev10003335m.g
S05_32270852	5	32270852	5	71.069	ID=Ciclev10003811m.g
S05_32320460	5	32320460	5	71.069	ID=Ciclev10001418m.g
S05_33693180	5	33693180	5	76.246	ID=Ciclev10003641m.g
S05_33247279	5	33247279	5	76.246	ID=Ciclev10001783m.g
S05_32721476	5	32721476	5	76.246	ID=Ciclev10000732m.g
S05_33264535	5	33264535	5	76.246	ID=Ciclev10000234m.g
S05_33399695	5	33399695	5	76.246	ID=Ciclev10002947m.g
S05_33348819	5	33348819	5	76.266	ID=Ciclev10003399m.g
S05_33244543	5	33244543	5	77.913	ID=Ciclev10000070m.g
S05_32629464	5	32629464	5	78.742	ID=Ciclev10001088m.g
S05_33850758	5	33850758	5	79.567	ID=Ciclev10002418m.g
S05_33699294	5	33699294	5	79.567	ID=Ciclev10000558m.g
S05_33028994	5	33028994	5	79.567	ID=Ciclev10000984m.g
S05_33288621	5	33288621	5	79.567	ID=Ciclev10000227m.g
S05_33758296	5	33758296	5	80.394	ID=Ciclev10000089m.g
S05_33888576	5	33888576	5	81.221	ID=Ciclev10000704m.g
S05_32908697	5	32908697	5	81.221	ID=Ciclev10003592m.g
S05_34333646	5	34333646	5	82.888	ID=Ciclev10001730m.g
S05_34166737	5	34166737	5	82.888	ID=Ciclev10003144m.g
S05_34179407	5	34179407	5	82.888	ID=Ciclev10003854m.g
S05_34025509	5	34025509	5	82.888	ID=Ciclev10002200m.g
S05_34401451	5	34401451	5	82.888	ID=Ciclev10000565m.g
S05_34050282	5	34050282	5	83.869	ID=Ciclev10001988m.g
S05_34143844	5	34143844	5	84.542	ID=Ciclev10003403m.g
S05_34077426	5	34077426	5	84.542	ID=Ciclev10003914m.g
S05_33985291	5	33985291	5	84.542	ID=Ciclev10003420m.g
S05_34414822	5	34414822	5	87.933	ID=Ciclev10001042m.g
S05_34480328	5	34480328	5	87.933	ID=Ciclev10000363m.g
S05_34454808	5	34454808	5	87.933	ID=Ciclev10001445m.g
S05_34491312	5	34491312	5	87.933	ID=Ciclev10001990m.g
S05_34662048	5	34662048	5	90.454	ID=Ciclev10001733m.g
S05_34572304	5	34572304	5	90.454	ID=Ciclev10003450m.g
S05_34659442	5	34659442	5	92.977	ID=Ciclev10003023m.g
S05_34698173	5	34698173	5	92.977	ID=Ciclev10001488m.g
S05_35193227	5	35193227	5	94.646	ID=Ciclev10003118m.g
S05_34915829	5	34915829	5	96.315	ID=Ciclev10001508m.g
S05_34932398	5	34932398	5	97.985	ID=Ciclev10000171m.g
S05_35016554	5	35016554	5	97.985	ID=Ciclev10000361m.g
S05_35119778	5	35119778	5	99.652	ID=Ciclev10000073m.g
S05_35139896	5	35139896	5	99.652	ID=Ciclev10000765m.g
S05_35521981	5	35521981	5	101.321	ID=Ciclev10001318m.g
S05_35481020	5	35481020	5	101.321	ID=Ciclev10000002m.g
S05_35975188	5	35975188	5	104.716	ID=Ciclev10001677m.g
S05_35901593	5	35901593	5	105.471	ID=Ciclev10001050m.g
S05_35897627	5	35897627	5	106.373	ID=Ciclev10003510m.g
S05_35811843	5	35811843	5	106.373	ID=Ciclev10003720m.g
S05_35825120	5	35825120	5	106.373	ID=Ciclev10000370m.g
S05_36014384	5	36014384	5	106.373	ID=Ciclev10001098m.g
S05_36021776	5	36021776	5	106.373	ID=Ciclev10001605m.g
S05_35812531	5	35812531	5	106.373	ID=Ciclev10003472m.g
S05_36108329	5	36108329	5	108.04	ID=Ciclev10002573m.g
S05_36092538	5	36092538	5	108.04	ID=Ciclev10000706m.g
S05_36251891	5	36251891	5	109.708	ID=Ciclev10000925m.g
S05_37091596	5	37091596	5	111.376	ID=Ciclev10000652m.g
S05_36456697	5	36456697	5	111.376	ID=Ciclev10000337m.g
S05_36825383	5	36825383	5	111.376	ID=Ciclev10004036m.g
S05_36952857	5	36952857	5	116.566	ID=Ciclev10001827m.g
S05_37817382	5	37817382	5	119.979	ID=Ciclev10000005m.g
S05_36879692	5	36879692	5	123.379	ID=Ciclev10001364m.g
S05_36753850	5	36753850	5	123.379	ID=Ciclev10003301m.g
S04_23428140	4	23428140	5	125.048	ID=Ciclev10030927m.g
S05_36799437	5	36799437	5	125.048	ID=Ciclev10001268m.g
S05_36673311	5	36673311	5	125.048	ID=Ciclev10000007m.g
S05_36699324	5	36699324	5	125.048	ID=Ciclev10000521m.g
S05_36647034	5	36647034	5	125.048	ID=Ciclev10002627m.g
S05_37150390	5	37150390	5	126.715	ID=Ciclev10000093m.g
S05_37383324	5	37383324	5	126.715	ID=Ciclev10001712m.g
S05_37303944	5	37303944	5	126.715	ID=Ciclev10001739m.g
S05_37211938	5	37211938	5	126.715	ID=Ciclev10003221m.g
S05_37181214	5	37181214	5	127.541	ID=Ciclev10000940m.g
S05_37409865	5	37409865	5	128.367	ID=Ciclev10000438m.g
S05_37437637	5	37437637	5	128.367	ID=Ciclev10001829m.g
S05_37241107	5	37241107	5	128.367	ID=Ciclev10002717m.g
S05_37256604	5	37256604	5	128.368	ID=Ciclev10001460m.g
S05_38579459	5	38579459	5	130.89	ID=Ciclev10002398m.g
S05_38132186	5	38132186	5	133.414	ID=Ciclev10000341m.g
S05_39359301	5	39359301	5	135.083	ID=Ciclev10000691m.g
S05_38750649	5	38750649	5	135.083	ID=Ciclev10003841m.g
S05_38421950	5	38421950	5	138.476	ID=Ciclev10002261m.g
S05_38603855	5	38603855	5	139.289	ID=Ciclev10002923m.g
S05_38926830	5	38926830	5	140.133	ID=Ciclev10003802m.g
S05_39161302	5	39161302	5	143.526	ID=Ciclev10003530m.g
S05_38342371	5	38342371	5	143.526	ID=Ciclev10001382m.g
S05_37750945	5	37750945	5	145.196	ID=Ciclev10000954m.g
S05_39301578	5	39301578	5	147.72	ID=Ciclev10002068m.g
S05_39314291	5	39314291	5	150.244	ID=Ciclev10000033m.g
S05_39091840	5	39091840	5	150.244	ID=Ciclev10003681m.g
S05_37544652	5	37544652	5	151.915	ID=Ciclev10003265m.g
S05_37534273	5	37534273	5	153.587	ID=Ciclev10000949m.g
S05_37559697	5	37559697	5	153.587	ID=Ciclev10000080m.g
S05_37597799	5	37597799	5	153.587	ID=Ciclev10003678m.g
S05_37570919	5	37570919	5	153.587	ID=Ciclev10000010m.g
S05_37671282	5	37671282	5	155.255	ID=Ciclev10000425m.g
S05_38516353	5	38516353	5	156.923	ID=Ciclev10002251m.g
S05_39224893	5	39224893	5	156.923	ID=Ciclev10000749m.g
S05_38669745	5	38669745	5	160.314	ID=Ciclev10000627m.g
S05_39283025	5	39283025	5	160.314	ID=Ciclev10004050m.g
S05_38813295	5	38813295	5	160.314	ID=Ciclev10002431m.g
S05_39111772	5	39111772	5	160.314	ID=Ciclev10001743m.g
S05_39296648	5	39296648	5	160.314	ID=Ciclev10000533m.g
S05_38774965	5	38774965	5	160.314	ID=Ciclev10000601m.g
S05_38124867	5	38124867	5	161.14	ID=Ciclev10003893m.g
S05_38566755	5	38566755	5	161.968	ID=Ciclev10001715m.g
S05_38235074	5	38235074	5	161.968	ID=Ciclev10000185m.g
S05_39145728	5	39145728	5	161.968	ID=Ciclev10003908m.g
S05_38093846	5	38093846	5	161.968	ID=Ciclev10001030m.g
S05_39252307	5	39252307	5	161.968	ID=Ciclev10000771m.g
S05_39600601	5	39600601	5	165.37	ID=Ciclev10000021m.g
S05_39511206	5	39511206	5	167.046	ID=Ciclev10002730m.g
S05_40386303	5	40386303	5	170.444	ID=Ciclev10001214m.g
S05_39694366	5	39694366	5	170.444	ID=Ciclev10000804m.g
S05_39893984	5	39893984	5	170.444	ID=Ciclev10002344m.g
S05_40035854	5	40035854	5	173.835	ID=Ciclev10003898m.g
S05_39702778	5	39702778	5	173.835	ID=Ciclev10000682m.g
S05_40091538	5	40091538	5	175.502	ID=Ciclev10003815m.g
S05_39741425	5	39741425	5	175.502	ID=Ciclev10000723m.g
S05_40349357	5	40349357	5	177.171	ID=Ciclev10000175m.g
S05_40010125	5	40010125	5	178.839	ID=Ciclev10000459m.g
S05_40141399	5	40141399	5	178.839	ID=Ciclev10001159m.g
S05_40503604	5	40503604	5	180.506	ID=Ciclev10000779m.g
S05_40042391	5	40042391	5	180.506	ID=Ciclev10000364m.g
S05_40429150	5	40429150	5	183.03	ID=Ciclev10001332m.g
S05_39929044	5	39929044	5	185.552	ID=Ciclev10001636m.g
S05_40633018	5	40633018	5	185.552	ID=Ciclev10002047m.g
S05_40676947	5	40676947	5	187.219	ID=Ciclev10003605m.g
S05_40636398	5	40636398	5	187.219	ID=Ciclev10003036m.g
S05_40876462	5	40876462	5	188.886	ID=Ciclev10000910m.g
S05_40749195	5	40749195	5	188.886	ID=Ciclev10001493m.g
S05_40961328	5	40961328	5	192.28	ID=Ciclev10000013m.g
S05_40921442	5	40921442	5	193.735	ID=Ciclev10003473m.g
S05_41064133	5	41064133	5	193.943	ID=Ciclev10000217m.g
S05_41100584	5	41100584	5	193.943	ID=Ciclev10000579m.g
S05_41243971	5	41243971	5	194.76	ID=Ciclev10001170m.g
S05_41286196	5	41286196	5	195.599	ID=Ciclev10002738m.g
S05_41441028	5	41441028	5	197.269	ID=Ciclev10002101m.g
S05_41481628	5	41481628	5	198.938	ID=Ciclev10001438m.g
S05_41720208	5	41720208	5	200.609	ID=Ciclev10001297m.g
S05_41595676	5	41595676	5	202.277	ID=Ciclev10000097m.g
S05_41654822	5	41654822	5	202.277	ID=Ciclev10002853m.g
S05_41590255	5	41590255	5	202.277	ID=Ciclev10000322m.g
S05_41722950	5	41722950	5	202.277	ID=Ciclev10000183m.g
S05_41568189	5	41568189	5	203.946	ID=Ciclev10002195m.g
S05_42220767	5	42220767	5	205.616	ID=Ciclev10000767m.g
S05_41881666	5	41881666	5	207.283	ID=Ciclev10001255m.g
S05_42235610	5	42235610	5	207.283	ID=Ciclev10003990m.g
S05_42103002	5	42103002	5	207.283	ID=Ciclev10000054m.g
S05_41790595	5	41790595	5	207.283	ID=Ciclev10001007m.g
S05_41819674	5	41819674	5	208.951	ID=Ciclev10000087m.g
S05_42638044	5	42638044	5	212.343	ID=Ciclev10003823m.g
S05_42842551	5	42842551	5	219.372	ID=Ciclev10000306m.g
S05_42900985	5	42900985	5	219.372	ID=Ciclev10000611m.g
S05_42876899	5	42876899	5	219.372	ID=Ciclev10001114m.g
S06_552062	6	552062	6	0	ID=Ciclev10011820m.g
S06_498493	6	498493	6	0	ID=Ciclev10011912m.g
S06_564189	6	564189	6	0	ID=Ciclev10013309m.g
S06_10092115	6	10092115	6	7.034	ID=Ciclev10011188m.g
S06_6304063	6	6304063	6	7.034	ID=Ciclev10011125m.g
S06_7125949	6	7125949	6	7.034	ID=Ciclev10012732m.g
S06_11102965	6	11102965	6	10.435	ID=Ciclev10012548m.g
S06_11462163	6	11462163	6	12.109	ID=Ciclev10011862m.g
S06_11938538	6	11938538	6	12.109	ID=Ciclev10011108m.g
S08_23623480	8	23623480	6	17.94	ID=Ciclev10027837m.g
S06_14230074	6	14230074	6	20.716	ID=Ciclev10011102m.g
S06_13371589	6	13371589	6	20.716	ID=Ciclev10011092m.g
S06_13631934	6	13631934	6	20.716	ID=Ciclev10012740m.g
S06_13449082	6	13449082	6	20.716	ID=Ciclev10011745m.g
S06_14373074	6	14373074	6	20.716	ID=Ciclev10011358m.g
S06_15341827	6	15341827	6	24.107	ID=Ciclev10012857m.g
S06_15221853	6	15221853	6	24.107	ID=Ciclev10011305m.g
S06_15072197	6	15072197	6	24.107	ID=Ciclev10011268m.g
S06_15679040	6	15679040	6	27.5	ID=Ciclev10013588m.g
S06_16235415	6	16235415	6	29.177	ID=Ciclev10013484m.g
S06_16841629	6	16841629	6	34.386	ID=Ciclev10010996m.g
S06_17007902	6	17007902	6	36.229	ID=Ciclev10013125m.g
S06_20855147	6	20855147	6	58.485	ID=Ciclev10011131m.g
S06_20894784	6	20894784	6	58.485	ID=Ciclev10010903m.g
S06_21037367	6	21037367	6	60.151	ID=Ciclev10012049m.g
S06_21108317	6	21108317	6	60.151	ID=Ciclev10010892m.g
S06_21066818	6	21066818	6	60.151	ID=Ciclev10010952m.g
S06_21086189	6	21086189	6	60.151	ID=Ciclev10013782m.g
S06_21133611	6	21133611	6	63.551	ID=Ciclev10012216m.g
S06_21165534	6	21165534	6	63.551	ID=Ciclev10013017m.g
S06_21300943	6	21300943	6	63.551	ID=Ciclev10011036m.g
S06_21481949	6	21481949	6	67.372	ID=Ciclev10011065m.g
S06_21786425	6	21786425	6	75.359	ID=Ciclev10013336m.g
S06_21983625	6	21983625	6	77.233	ID=Ciclev10011580m.g
S06_22828282	6	22828282	6	79.805	ID=Ciclev10013371m.g
S06_23147627	6	23147627	6	82.025	ID=Ciclev10012575m.g
S06_22544691	6	22544691	6	84.218	ID=Ciclev10012974m.g
S06_23579311	6	23579311	6	84.218	ID=Ciclev10011302m.g
S06_24380310	6	24380310	6	84.218	ID=Ciclev10013340m.g
S06_22307870	6	22307870	6	87.619	ID=Ciclev10012265m.g
S06_22095421	6	22095421	6	87.619	ID=Ciclev10012626m.g
S06_23068554	6	23068554	6	92.827	ID=Ciclev10011430m.g
S06_22986901	6	22986901	6	98.002	ID=Ciclev10011795m.g
S03_23488114	3	23488114	6	98.002	ID=Ciclev10024661m.g
S06_23028307	6	23028307	6	98.002	ID=Ciclev10013264m.g
S06_23041125	6	23041125	6	98.002	ID=Ciclev10013755m.g
S06_24753054	6	24753054	6	106.954	ID=Ciclev10010889m.g
S06_25150352	6	25150352	6	106.954	ID=Ciclev10013796m.g
S06_24686898	6	24686898	6	106.954	ID=Ciclev10012004m.g
S06_25320333	6	25320333	6	106.954	ID=Ciclev10013417m.g
S06_24739514	6	24739514	6	106.954	ID=Ciclev10011009m.g
S06_25021089	6	25021089	6	106.954	ID=Ciclev10011967m.g
S06_25225315	6	25225315	6	106.954	ID=Ciclev10011242m.g
S07_1739845	7	1739845	7	0	ID=Ciclev10025354m.g
S07_1820689	7	1820689	7	0	ID=Ciclev10025352m.g
S07_1843281	7	1843281	7	0	ID=Ciclev10026346m.g
S07_1908962	7	1908962	7	0	ID=Ciclev10024987m.g
S07_1760308	7	1760308	7	0	ID=Ciclev10027167m.g
S07_1875032	7	1875032	7	0	ID=Ciclev10025287m.g
S07_1942753	7	1942753	7	0	ID=Ciclev10025926m.g
S07_1737900	7	1737900	7	0	ID=Ciclev10025528m.g
S07_1826961	7	1826961	7	0	ID=Ciclev10024708m.g
S07_1363133	7	1363133	7	1.786	ID=Ciclev10027574m.g
S07_273717	7	273717	7	1.786	ID=Ciclev10025215m.g
S07_930529	7	930529	7	1.786	ID=Ciclev10025092m.g
S07_902040	7	902040	7	1.786	ID=Ciclev10026139m.g
S07_371237	7	371237	7	1.786	ID=Ciclev10026057m.g
S07_882690	7	882690	7	1.786	ID=Ciclev10025798m.g
S07_290288	7	290288	7	1.786	ID=Ciclev10025307m.g
S07_740721	7	740721	7	1.786	ID=Ciclev10026205m.g
S07_1395950	7	1395950	7	1.786	ID=Ciclev10025467m.g
S07_1180913	7	1180913	7	1.786	ID=Ciclev10024677m.g
S07_492485	7	492485	7	1.786	ID=Ciclev10025620m.g
S07_926251	7	926251	7	1.786	ID=Ciclev10027108m.g
S07_1433907	7	1433907	7	1.786	ID=Ciclev10024691m.g
S07_877465	7	877465	7	1.786	ID=Ciclev10026691m.g
S07_915534	7	915534	7	1.786	ID=Ciclev10026181m.g
S07_401258	7	401258	7	1.786	ID=Ciclev10026997m.g
S07_192032	7	192032	7	1.786	ID=Ciclev10025677m.g
S07_1349137	7	1349137	7	1.786	ID=Ciclev10027500m.g
S07_205615	7	205615	7	1.786	ID=Ciclev10025598m.g
S07_681344	7	681344	7	1.786	ID=Ciclev10025900m.g
S07_1680444	7	1680444	7	1.786	ID=Ciclev10025725m.g
S07_861106	7	861106	7	1.786	ID=Ciclev10024800m.g
S07_180153	7	180153	7	1.786	ID=Ciclev10024825m.g
S07_185479	7	185479	7	1.786	ID=Ciclev10026688m.g
S07_731138	7	731138	7	1.786	ID=Ciclev10025182m.g
S07_871172	7	871172	7	1.786	ID=Ciclev10025325m.g
S07_1266727	7	1266727	7	1.786	ID=Ciclev10026308m.g
S07_175901	7	175901	7	5.428	ID=Ciclev10027191m.g
S07_3294596	7	3294596	7	10.993	ID=Ciclev10024929m.g
S07_3447086	7	3447086	7	10.993	ID=Ciclev10025109m.g
S07_3385070	7	3385070	7	10.993	ID=Ciclev10024826m.g
S07_2228843	7	2228843	7	12.78	ID=Ciclev10025048m.g
S07_2895844	7	2895844	7	14.567	ID=Ciclev10027275m.g
S07_2688435	7	2688435	7	14.567	ID=Ciclev10024810m.g
S07_2939174	7	2939174	7	14.567	ID=Ciclev10025791m.g
S07_3390623	7	3390623	7	18.197	ID=Ciclev10027323m.g
S07_3227521	7	3227521	7	18.204	ID=Ciclev10025089m.g
S07_2139155	7	2139155	7	18.204	ID=Ciclev10025746m.g
S07_3401126	7	3401126	7	18.204	ID=Ciclev10025986m.g
S07_2682404	7	2682404	7	18.227	ID=Ciclev10024926m.g
S07_2206656	7	2206656	7	21.841	ID=Ciclev10027059m.g
S07_2593033	7	2593033	7	21.841	ID=Ciclev10026511m.g
S07_2074917	7	2074917	7	21.841	ID=Ciclev10025149m.g
S07_2637371	7	2637371	7	21.841	ID=Ciclev10024678m.g
S07_2954250	7	2954250	7	21.841	ID=Ciclev10025192m.g
S07_3040010	7	3040010	7	21.841	ID=Ciclev10025861m.g
S07_2715037	7	2715037	7	22.445	ID=Ciclev10025487m.g
S07_2608244	7	2608244	7	23.048	ID=Ciclev10026303m.g
S07_2014970	7	2014970	7	23.607	ID=Ciclev10025293m.g
S07_3406608	7	3406608	7	23.607	ID=Ciclev10024767m.g
S07_3236795	7	3236795	7	23.607	ID=Ciclev10025943m.g
S07_3149605	7	3149605	7	23.607	ID=Ciclev10024681m.g
S07_2985143	7	2985143	7	25.394	ID=Ciclev10025216m.g
S07_3571967	7	3571967	7	27.185	ID=Ciclev10025336m.g
S07_4058524	7	4058524	7	33.967	ID=Ciclev10027450m.g
S07_3917346	7	3917346	7	33.967	ID=Ciclev10025596m.g
S07_3859099	7	3859099	7	36.108	ID=Ciclev10024760m.g
S07_4128191	7	4128191	7	38.256	ID=Ciclev10026545m.g
S07_4278714	7	4278714	7	41.902	ID=Ciclev10025483m.g
S07_4822912	7	4822912	7	49.495	ID=Ciclev10024875m.g
S07_5146366	7	5146366	7	53.161	ID=Ciclev10024755m.g
S07_5410789	7	5410789	7	56.827	ID=Ciclev10027273m.g
S07_5704418	7	5704418	7	60.476	ID=Ciclev10025496m.g
S07_6370885	7	6370885	7	62.269	ID=Ciclev10024781m.g
S07_6440586	7	6440586	7	64.06	ID=Ciclev10025448m.g
S07_6387837	7	6387837	7	64.06	ID=Ciclev10024961m.g
S07_6838252	7	6838252	7	65.848	ID=Ciclev10024676m.g
S07_6905350	7	6905350	7	67.636	ID=Ciclev10025070m.g
S07_6929895	7	6929895	7	67.636	ID=Ciclev10027473m.g
S07_8395132	7	8395132	7	71.279	ID=Ciclev10024743m.g
S07_7845654	7	7845654	7	71.279	ID=Ciclev10027008m.g
S07_8146614	7	8146614	7	73.067	ID=Ciclev10026930m.g
S07_7959180	7	7959180	7	74.854	ID=Ciclev10026808m.g
S07_7945015	7	7945015	7	74.854	ID=Ciclev10026383m.g
S07_8211816	7	8211816	7	76.641	ID=Ciclev10025938m.g
S07_7827620	7	7827620	7	76.641	ID=Ciclev10024934m.g
S07_8513898	7	8513898	7	76.641	ID=Ciclev10024891m.g
S07_7400719	7	7400719	7	77.527	ID=Ciclev10024725m.g
S07_7023456	7	7023456	7	78.411	ID=Ciclev10025601m.g
S07_8246376	7	8246376	7	78.411	ID=Ciclev10025419m.g
S07_8327760	7	8327760	7	81.115	ID=Ciclev10025716m.g
S07_7324809	7	7324809	7	81.115	ID=Ciclev10025154m.g
S07_7265514	7	7265514	7	83.82	ID=Ciclev10025411m.g
S07_8249936	7	8249936	7	83.82	ID=Ciclev10025103m.g
S07_7962481	7	7962481	7	83.82	ID=Ciclev10025233m.g
S07_8506617	7	8506617	7	83.82	ID=Ciclev10026283m.g
S07_7797843	7	7797843	7	83.82	ID=Ciclev10025816m.g
S07_8440906	7	8440906	7	83.82	ID=Ciclev10025950m.g
S07_8373422	7	8373422	7	83.82	ID=Ciclev10025091m.g
S07_8340332	7	8340332	7	83.82	ID=Ciclev10025452m.g
S07_8764184	7	8764184	7	85.606	ID=Ciclev10025189m.g
S07_9042069	7	9042069	7	85.606	ID=Ciclev10026140m.g
S07_8858370	7	8858370	7	85.606	ID=Ciclev10024803m.g
S07_8909779	7	8909779	7	87.241	ID=Ciclev10027173m.g
S07_8774196	7	8774196	7	87.387	ID=Ciclev10025368m.g
S07_9021397	7	9021397	7	87.387	ID=Ciclev10024822m.g
S07_7965306	7	7965306	7	91.025	ID=Ciclev10025289m.g
S07_7642042	7	7642042	7	91.025	ID=Ciclev10025604m.g
S07_8640065	7	8640065	7	92.812	ID=Ciclev10027587m.g
S07_7876325	7	7876325	7	93.903	ID=Ciclev10027324m.g
S07_7064298	7	7064298	7	94.585	ID=Ciclev10025181m.g
S07_7350256	7	7350256	7	94.585	ID=Ciclev10025673m.g
S07_7898863	7	7898863	7	96.372	ID=Ciclev10025232m.g
S01_26623341	1	26623341	7	98.159	ID=Ciclev10010842m.g
S07_10271486	7	10271486	7	98.159	ID=Ciclev10027224m.g
S01_19804022	1	19804022	7	99.945	ID=Ciclev10010060m.g
S07_10470218	7	10470218	7	101.731	ID=Ciclev10024977m.g
S07_10414972	7	10414972	7	101.731	ID=Ciclev10024707m.g
S07_10011844	7	10011844	7	103.519	ID=Ciclev10025498m.g
S07_11245034	7	11245034	7	107.16	ID=Ciclev10027305m.g
S07_11307349	7	11307349	7	107.16	ID=Ciclev10026390m.g
S07_11028023	7	11028023	7	107.16	ID=Ciclev10024858m.g
S07_10762519	7	10762519	7	107.16	ID=Ciclev10026079m.g
S07_10807651	7	10807651	7	108.946	ID=Ciclev10025851m.g
S07_10866226	7	10866226	7	108.946	ID=Ciclev10026275m.g
S07_13322380	7	13322380	7	112.584	ID=Ciclev10026525m.g
S07_13173748	7	13173748	7	112.584	ID=Ciclev10025584m.g
S07_13003362	7	13003362	7	112.584	ID=Ciclev10024946m.g
S07_13393945	7	13393945	7	112.584	ID=Ciclev10024717m.g
S07_13027708	7	13027708	7	116.229	ID=Ciclev10026249m.g
S07_14151723	7	14151723	7	119.875	ID=Ciclev10024905m.g
S07_14137109	7	14137109	7	119.875	ID=Ciclev10024841m.g
S07_14284271	7	14284271	7	121.661	ID=Ciclev10026151m.g
S07_14385697	7	14385697	7	121.661	ID=Ciclev10024814m.g
S07_14584086	7	14584086	7	125.297	ID=Ciclev10025544m.g
S07_14681491	7	14681491	7	125.298	ID=Ciclev10027257m.g
S07_15212800	7	15212800	7	125.298	ID=Ciclev10027095m.g
S07_15091784	7	15091784	7	125.298	ID=Ciclev10026430m.g
S07_15877339	7	15877339	7	127.681	ID=Ciclev10027033m.g
S04_5032444	4	5032444	7	127.681	ID=Ciclev10031631m.g
S05_14344710	5	14344710	7	132.607	ID=Ciclev10000225m.g
S05_18108480	5	18108480	7	132.607	ID=Ciclev10004053m.g
S07_16630111	7	16630111	7	132.607	ID=Ciclev10025084m.g
S07_16844040	7	16844040	7	132.607	ID=Ciclev10027040m.g
S07_16872462	7	16872462	7	132.607	ID=Ciclev10027387m.g
S05_16132934	5	16132934	7	132.607	ID=Ciclev10000587m.g
S07_16552175	7	16552175	7	132.607	ID=Ciclev10025271m.g
S05_16528497	5	16528497	7	132.607	ID=Ciclev10001203m.g
S07_16948186	7	16948186	7	132.607	ID=Ciclev10026982m.g
S07_16691411	7	16691411	7	132.607	ID=Ciclev10024723m.g
S07_16615255	7	16615255	7	136.245	ID=Ciclev10026434m.g
S05_18135395	5	18135395	7	136.245	ID=Ciclev10000018m.g
S07_17255984	7	17255984	7	138.032	ID=Ciclev10025939m.g
S07_17487643	7	17487643	7	139.819	ID=Ciclev10027028m.g
S07_17901828	7	17901828	7	141.606	ID=Ciclev10024737m.g
S07_17534295	7	17534295	7	141.606	ID=Ciclev10026032m.g
S07_17676692	7	17676692	7	141.606	ID=Ciclev10027405m.g
S07_17807020	7	17807020	7	141.606	ID=Ciclev10025253m.g
S07_18311797	7	18311797	7	143.392	ID=Ciclev10024679m.g
S07_18343520	7	18343520	7	143.392	ID=Ciclev10027573m.g
S07_18351742	7	18351742	7	143.536	ID=Ciclev10027395m.g
S07_18992617	7	18992617	7	145.173	ID=Ciclev10024954m.g
S07_19114004	7	19114004	7	145.173	ID=Ciclev10025197m.g
S05_18394450	5	18394450	7	145.173	ID=Ciclev10000834m.g
S07_19119673	7	19119673	7	145.173	ID=Ciclev10024728m.g
S07_19529441	7	19529441	7	145.173	ID=Ciclev10027269m.g
S07_19596607	7	19596607	7	145.173	ID=Ciclev10027547m.g
S07_19618556	7	19618556	7	145.173	ID=Ciclev10026971m.g
S07_20115273	7	20115273	7	146.959	ID=Ciclev10025730m.g
S07_20091557	7	20091557	7	146.959	ID=Ciclev10024812m.g
S07_20105781	7	20105781	7	146.959	ID=Ciclev10024684m.g
S07_20041368	7	20041368	7	146.959	ID=Ciclev10027075m.g
S07_20526014	7	20526014	7	148.746	ID=Ciclev10027553m.g
S07_20540518	7	20540518	7	148.746	ID=Ciclev10027510m.g
S07_20555593	7	20555593	7	150.532	ID=Ciclev10025052m.g
S07_20900267	7	20900267	7	150.533	ID=Ciclev10025648m.g
S07_20847549	7	20847549	7	152.318	ID=Ciclev10025269m.g
S07_20867391	7	20867391	7	152.318	ID=Ciclev10025805m.g
S07_21025170	7	21025170	7	152.318	ID=Ciclev10027400m.g
S07_21004059	7	21004059	7	152.318	ID=Ciclev10025447m.g
S07_21079556	7	21079556	7	152.318	ID=Ciclev10026951m.g
S08_184086	8	184086	8	0	ID=Ciclev10028098m.g
S08_36471	8	36471	8	1.695	ID=Ciclev10027745m.g
S08_265031	8	265031	8	1.695	ID=Ciclev10027787m.g
S08_289006	8	289006	8	1.695	ID=Ciclev10028003m.g
S08_536935	8	536935	8	5.11	ID=Ciclev10028131m.g
S08_2173659	8	2173659	8	18.497	ID=Ciclev10029274m.g
S08_2513786	8	2513786	8	22.513	ID=Ciclev10027846m.g
S08_2720265	8	2720265	8	25.487	ID=Ciclev10028040m.g
S08_2635854	8	2635854	8	28.457	ID=Ciclev10027853m.g
S08_2814622	8	2814622	8	28.457	ID=Ciclev10028334m.g
S08_2850191	8	2850191	8	28.457	ID=Ciclev10027734m.g
S08_2947677	8	2947677	8	33.634	ID=Ciclev10030049m.g
S08_3701645	8	3701645	8	33.634	ID=Ciclev10027659m.g
S08_3494242	8	3494242	8	33.634	ID=Ciclev10028454m.g
S08_4417547	8	4417547	8	33.634	ID=Ciclev10029642m.g
S08_4555434	8	4555434	8	38.822	ID=Ciclev10029826m.g
S08_4046868	8	4046868	8	40.499	ID=Ciclev10027657m.g
S08_5052209	8	5052209	8	45.686	ID=Ciclev10030203m.g
S08_4892311	8	4892311	8	45.686	ID=Ciclev10028655m.g
S08_6050577	8	6050577	8	47.353	ID=Ciclev10027768m.g
S08_5719271	8	5719271	8	47.91	ID=Ciclev10029834m.g
S08_5326467	8	5326467	8	48.459	ID=Ciclev10028904m.g
S08_5491130	8	5491130	8	49.002	ID=Ciclev10027908m.g
S08_6643244	8	6643244	8	49.002	ID=Ciclev10027673m.g
S08_5315216	8	5315216	8	49.002	ID=Ciclev10028526m.g
S08_5941212	8	5941212	8	54.179	ID=Ciclev10028169m.g
S08_6197486	8	6197486	8	54.179	ID=Ciclev10027697m.g
S08_5583583	8	5583583	8	54.179	ID=Ciclev10028780m.g
S08_5909537	8	5909537	8	54.179	ID=Ciclev10028779m.g
S08_8140547	8	8140547	8	61.209	ID=Ciclev10029494m.g
S08_6946355	8	6946355	8	61.209	ID=Ciclev10028076m.g
S09_13043876	9	13043876	8	61.209	ID=Ciclev10005064m.g
S08_10889123	8	10889123	8	61.209	ID=Ciclev10030244m.g
S03_41034561	3	41034561	8	61.209	ID=Ciclev10018706m.g
S09_12840779	9	12840779	8	66.385	ID=Ciclev10005352m.g
S09_12849941	9	12849941	8	66.386	ID=Ciclev10004300m.g
S01_2135444	1	2135444	8	68.055	ID=Ciclev10010816m.g
S09_12572791	9	12572791	8	68.055	ID=Ciclev10005234m.g
S03_34691029	3	34691029	8	73.24	ID=Ciclev10020798m.g
S03_34306466	3	34306466	8	74.914	ID=Ciclev10019185m.g
S03_35326046	3	35326046	8	75.703	ID=Ciclev10022222m.g
S03_34838072	3	34838072	8	76.574	ID=Ciclev10020693m.g
S09_11452840	9	11452840	8	78.258	ID=Ciclev10004119m.g
S08_18020390	8	18020390	8	85.326	ID=Ciclev10029485m.g
S08_18277250	8	18277250	8	88.736	ID=Ciclev10027742m.g
S08_18364649	8	18364649	8	88.736	ID=Ciclev10027955m.g
S08_17837136	8	17837136	8	94.706	ID=Ciclev10029424m.g
S08_17845290	8	17845290	8	102.854	ID=Ciclev10027695m.g
S08_17432786	8	17432786	8	102.854	ID=Ciclev10029749m.g
S08_17785227	8	17785227	8	106.245	ID=Ciclev10027700m.g
S03_34322627	3	34322627	8	106.245	ID=Ciclev10024330m.g
S08_18015469	8	18015469	8	109.639	ID=Ciclev10030024m.g
S08_18863594	8	18863594	8	113.704	ID=Ciclev10029347m.g
S08_18745498	8	18745498	8	113.704	ID=Ciclev10027754m.g
S08_19741035	8	19741035	8	117.769	ID=Ciclev10027891m.g
S08_20271848	8	20271848	8	120.332	ID=Ciclev10028244m.g
S08_19627873	8	19627873	8	120.332	ID=Ciclev10027692m.g
S08_20481799	8	20481799	8	126.83	ID=Ciclev10028932m.g
S08_20149720	8	20149720	8	126.83	ID=Ciclev10028028m.g
S08_21418800	8	21418800	8	130.221	ID=Ciclev10028138m.g
S08_19503894	8	19503894	8	130.221	ID=Ciclev10029136m.g
S08_21155896	8	21155896	8	130.221	ID=Ciclev10029196m.g
S08_21141580	8	21141580	8	138.808	ID=Ciclev10028853m.g
S08_21560963	8	21560963	8	140.8	ID=Ciclev10027892m.g
S08_21848703	8	21848703	8	142.471	ID=Ciclev10028754m.g
S08_22014383	8	22014383	8	144.141	ID=Ciclev10030432m.g
S08_22483886	8	22483886	8	146.294	ID=Ciclev10029532m.g
S08_22307772	8	22307772	8	151.719	ID=Ciclev10029783m.g
S08_22303922	8	22303922	8	157.75	ID=Ciclev10028524m.g
S08_22466220	8	22466220	8	159.662	ID=Ciclev10028995m.g
S08_22191888	8	22191888	8	159.662	ID=Ciclev10028294m.g
S08_22576575	8	22576575	8	159.662	ID=Ciclev10030198m.g
S08_23203911	8	23203911	8	165.337	ID=Ciclev10030119m.g
S08_23159685	8	23159685	8	165.337	ID=Ciclev10029160m.g
S08_23366188	8	23366188	8	167.159	ID=Ciclev10028459m.g
S08_23591407	8	23591407	8	172.855	ID=Ciclev10027848m.g
S08_24701637	8	24701637	8	180.609	ID=Ciclev10030370m.g
S08_24921859	8	24921859	8	180.609	ID=Ciclev10028037m.g
S08_24319549	8	24319549	8	189.725	ID=Ciclev10029884m.g
S08_23601478	8	23601478	8	189.725	ID=Ciclev10027940m.g
S09_112649	9	112649	9	0	ID=Ciclev10006637m.g
S09_122335	9	122335	9	3.45	ID=Ciclev10006990m.g
S09_154694	9	154694	9	3.45	ID=Ciclev10005815m.g
S09_231864	9	231864	9	3.45	ID=Ciclev10004227m.g
S09_238948	9	238948	9	3.45	ID=Ciclev10006430m.g
S09_392520	9	392520	9	5.116	ID=Ciclev10004428m.g
S09_458321	9	458321	9	5.116	ID=Ciclev10004114m.g
S09_355832	9	355832	9	5.116	ID=Ciclev10004217m.g
S09_379789	9	379789	9	5.116	ID=Ciclev10004458m.g
S09_326306	9	326306	9	5.116	ID=Ciclev10004234m.g
S09_330099	9	330099	9	6.516	ID=Ciclev10004126m.g
S09_546517	9	546517	9	6.778	ID=Ciclev10004474m.g
S09_570128	9	570128	9	8.447	ID=Ciclev10004507m.g
S09_694272	9	694272	9	8.447	ID=Ciclev10006924m.g
S09_595862	9	595862	9	10.118	ID=Ciclev10005460m.g
S09_575039	9	575039	9	10.118	ID=Ciclev10005014m.g
S09_1043853	9	1043853	9	13.514	ID=Ciclev10004649m.g
S09_906725	9	906725	9	13.514	ID=Ciclev10004963m.g
S09_863897	9	863897	9	13.514	ID=Ciclev10006996m.g
S09_901031	9	901031	9	13.514	ID=Ciclev10006081m.g
S09_1023497	9	1023497	9	13.514	ID=Ciclev10004645m.g
S09_1059657	9	1059657	9	13.514	ID=Ciclev10004369m.g
S09_1211326	9	1211326	9	13.514	ID=Ciclev10006099m.g
S09_744853	9	744853	9	13.514	ID=Ciclev10006076m.g
S09_1314521	9	1314521	9	13.514	ID=Ciclev10005026m.g
S09_823567	9	823567	9	16.906	ID=Ciclev10004362m.g
S09_1196251	9	1196251	9	16.906	ID=Ciclev10006107m.g
S09_1198878	9	1198878	9	16.906	ID=Ciclev10006713m.g
S09_855025	9	855025	9	16.906	ID=Ciclev10004295m.g
S09_1148619	9	1148619	9	20.303	ID=Ciclev10004470m.g
S09_1104654	9	1104654	9	20.303	ID=Ciclev10004258m.g
S09_1014938	9	1014938	9	23.701	ID=Ciclev10005421m.g
S09_1001350	9	1001350	9	23.701	ID=Ciclev10004273m.g
S09_947743	9	947743	9	25.369	ID=Ciclev10004131m.g
S09_992087	9	992087	9	25.369	ID=Ciclev10004547m.g
S09_1645472	9	1645472	9	28.771	ID=Ciclev10004153m.g
S09_2111472	9	2111472	9	31.145	ID=Ciclev10004654m.g
S09_2054499	9	2054499	9	31.145	ID=Ciclev10004220m.g
S09_2366464	9	2366464	9	34.593	ID=Ciclev10005625m.g
S09_2501713	9	2501713	9	34.593	ID=Ciclev10004135m.g
S09_2274543	9	2274543	9	34.593	ID=Ciclev10004155m.g
S09_2200396	9	2200396	9	38.976	ID=Ciclev10006777m.g
S09_1823561	9	1823561	9	38.976	ID=Ciclev10007035m.g
S09_1798855	9	1798855	9	38.976	ID=Ciclev10004171m.g
S09_1733229	9	1733229	9	38.976	ID=Ciclev10004172m.g
S09_1896629	9	1896629	9	38.976	ID=Ciclev10006926m.g
S09_1678335	9	1678335	9	38.976	ID=Ciclev10004985m.g
S09_2147287	9	2147287	9	44.559	ID=Ciclev10006861m.g
S09_2136064	9	2136064	9	44.559	ID=Ciclev10004482m.g
S09_2284625	9	2284625	9	47.229	ID=Ciclev10004115m.g
S09_2340949	9	2340949	9	47.229	ID=Ciclev10007121m.g
S09_2325150	9	2325150	9	47.229	ID=Ciclev10004940m.g
S09_3091420	9	3091420	9	49.23	ID=Ciclev10006689m.g
S09_3119487	9	3119487	9	50.907	ID=Ciclev10005119m.g
S09_3180804	9	3180804	9	55.303	ID=Ciclev10006596m.g
S09_3239681	9	3239681	9	58.73	ID=Ciclev10004648m.g
S09_3331801	9	3331801	9	61.642	ID=Ciclev10005615m.g
S09_3362889	9	3362889	9	64.569	ID=Ciclev10004460m.g
S09_3696693	9	3696693	9	71.563	ID=Ciclev10005268m.g
S09_3756438	9	3756438	9	71.563	ID=Ciclev10006772m.g
S09_4656771	9	4656771	9	82.516	ID=Ciclev10004701m.g
S09_4660005	9	4660005	9	82.516	ID=Ciclev10007173m.g
S09_4612936	9	4612936	9	82.516	ID=Ciclev10006407m.g
S09_4606153	9	4606153	9	82.516	ID=Ciclev10007078m.g
S09_4735638	9	4735638	9	82.516	ID=Ciclev10005003m.g
S09_5562927	9	5562927	9	82.516	ID=Ciclev10005975m.g
S09_4624533	9	4624533	9	82.516	ID=Ciclev10006968m.g
S09_8109229	9	8109229	9	84.183	ID=Ciclev10006937m.g
S09_15918065	9	15918065	9	84.183	ID=Ciclev10006793m.g
S09_21960674	9	21960674	9	84.183	ID=Ciclev10004681m.g
S09_7877643	9	7877643	9	84.183	ID=Ciclev10006816m.g
S09_22211744	9	22211744	9	84.183	ID=Ciclev10004496m.g
S09_15761271	9	15761271	9	84.183	ID=Ciclev10006510m.g
S09_15324651	9	15324651	9	84.183	ID=Ciclev10006215m.g
S09_27290546	9	27290546	9	87.574	ID=Ciclev10004476m.g
S09_28043135	9	28043135	9	89.249	ID=Ciclev10004838m.g
S09_29368872	9	29368872	9	121.465	ID=Ciclev10006470m.g
S09_29563517	9	29563517	9	127.673	ID=Ciclev10004809m.g
S09_29881108	9	29881108	9	130.153	ID=Ciclev10005522m.g
S09_29643142	9	29643142	9	130.153	ID=Ciclev10006482m.g
S09_30182174	9	30182174	9	142.523	ID=Ciclev10004367m.g
S09_30389968	9	30389968	9	142.523	ID=Ciclev10004679m.g
S09_30806073	9	30806073	9	146.337	ID=Ciclev10004260m.g
S09_30848557	9	30848557	9	149.237	ID=Ciclev10005140m.g
S09_30876685	9	30876685	9	155.345	ID=Ciclev10005306m.g
S09_31244755	9	31244755	9	159.79	ID=Ciclev10004357m.g
S09_30997030	9	30997030	9	159.79	ID=Ciclev10005524m.g
S09_31192410	9	31192410	9	159.79	ID=Ciclev10006542m.g

## Sheet: Table S3
Table S3. Detail of the ‘Murcott’ genetic map including physical position (clementine reference genome), genetic position and the gene identifier on which the marker is located.
Marker	Scaffold	Phisical position	Linkage Group	Genetic position (cM)	Gene Identifier (Phytozome)
S01_52926	1	52926	1	0	ID=Ciclev10007306m.g
S01_70274	1	70274	1	0	ID=Ciclev10009318m.g
S01_96161	1	96161	1	1.724	ID=Ciclev10008079m.g
S01_112805	1	112805	1	1.724	ID=Ciclev10007230m.g
S01_150394	1	150394	1	1.724	ID=Ciclev10010213m.g
S01_512857	1	512857	1	9.01	ID=Ciclev10009036m.g
S01_564236	1	564236	1	9.01	ID=Ciclev10010585m.g
S01_875719	1	875719	1	9.01	ID=Ciclev10010730m.g
S01_879162	1	879162	1	9.01	ID=Ciclev10008089m.g
S01_1552102	1	1552102	1	15.609	ID=Ciclev10007910m.g
S01_1673316	1	1673316	1	15.609	ID=Ciclev10009428m.g
S01_2014067	1	2014067	1	18.332	ID=Ciclev10009882m.g
S01_2498133	1	2498133	1	24.935	ID=Ciclev10009234m.g
S01_2517446	1	2517446	1	24.935	ID=Ciclev10008356m.g
S01_2523698	1	2523698	1	24.935	ID=Ciclev10008018m.g
S01_2608734	1	2608734	1	24.935	ID=Ciclev10008850m.g
S01_2661745	1	2661745	1	24.935	ID=Ciclev10008063m.g
S01_2778358	1	2778358	1	24.935	ID=Ciclev10007228m.g
S01_2830529	1	2830529	1	24.935	ID=Ciclev10007447m.g
S01_3059913	1	3059913	1	28.898	ID=Ciclev10008414m.g
S01_3246088	1	3246088	1	28.898	ID=Ciclev10008071m.g
S01_3266244	1	3266244	1	28.898	ID=Ciclev10008690m.g
S01_3731194	1	3731194	1	33.914	ID=Ciclev10009901m.g
S01_3824062	1	3824062	1	38.925	ID=Ciclev10009011m.g
S01_4031477	1	4031477	1	38.925	ID=Ciclev10008860m.g
S01_4099866	1	4099866	1	38.925	ID=Ciclev10007603m.g
S01_4235975	1	4235975	1	38.925	ID=Ciclev10007747m.g
S01_4753466	1	4753466	1	46.875	ID=Ciclev10009893m.g
S01_5392696	1	5392696	1	49.336	ID=Ciclev10007575m.g
S01_5688188	1	5688188	1	51.312	ID=Ciclev10008775m.g
S01_6168773	1	6168773	1	51.312	ID=Ciclev10010574m.g
S01_6429918	1	6429918	1	51.312	ID=Ciclev10009505m.g
S01_6451641	1	6451641	1	51.312	ID=Ciclev10007776m.g
S01_6452853	1	6452853	1	51.312	ID=Ciclev10008857m.g
S01_7045839	1	7045839	1	54.769	ID=Ciclev10008049m.g
S01_7227854	1	7227854	1	54.769	ID=Ciclev10007513m.g
S01_7681251	1	7681251	1	56.471	ID=Ciclev10007269m.g
S01_8876030	1	8876030	1	63.187	ID=Ciclev10008074m.g
S01_14009139	1	14009139	1	65.311	ID=Ciclev10009291m.g
S01_14115823	1	14115823	1	65.311	ID=Ciclev10007317m.g
S01_14391203	1	14391203	1	66.921	ID=Ciclev10007788m.g
S01_14866103	1	14866103	1	67.008	ID=Ciclev10008533m.g
S01_15742231	1	15742231	1	69.136	ID=Ciclev10010852m.g
S01_17415203	1	17415203	1	75.878	ID=Ciclev10009308m.g
S01_17831378	1	17831378	1	79.356	ID=Ciclev10009061m.g
S01_18009707	1	18009707	1	79.356	ID=Ciclev10007869m.g
S01_22281840	1	22281840	1	82.836	ID=Ciclev10007873m.g
S01_22449826	1	22449826	1	84.55	ID=Ciclev10009601m.g
S06_17873935	6	17873935	1	91.78	ID=Ciclev10011668m.g
S01_22694645	1	22694645	1	95.277	ID=Ciclev10010199m.g
S01_22975873	1	22975873	1	95.277	ID=Ciclev10007536m.g
S01_23110907	1	23110907	1	101.361	ID=Ciclev10009869m.g
S01_23162602	1	23162602	1	101.361	ID=Ciclev10010287m.g
S01_23259161	1	23259161	1	101.361	ID=Ciclev10010406m.g
S01_23431732	1	23431732	1	101.361	ID=Ciclev10007691m.g
S01_24116702	1	24116702	1	109.636	ID=Ciclev10007802m.g
S01_24329530	1	24329530	1	109.636	ID=Ciclev10007904m.g
S01_24525941	1	24525941	1	111.35	ID=Ciclev10008687m.g
S01_25165173	1	25165173	1	119.322	ID=Ciclev10007884m.g
S01_25331390	1	25331390	1	122.99	ID=Ciclev10010155m.g
S01_25497528	1	25497528	1	126.64	ID=Ciclev10008781m.g
S01_25690547	1	25690547	1	126.64	ID=Ciclev10007867m.g
S01_25990600	1	25990600	1	129.05	ID=Ciclev10007524m.g
S01_26030989	1	26030989	1	129.05	ID=Ciclev10007933m.g
S01_26060166	1	26060166	1	129.05	ID=Ciclev10007734m.g
S01_26102810	1	26102810	1	129.05	ID=Ciclev10007497m.g
S01_26796432	1	26796432	1	130.746	ID=Ciclev10010390m.g
S01_26815936	1	26815936	1	130.746	ID=Ciclev10008911m.g
S01_27512849	1	27512849	1	139.953	ID=Ciclev10009728m.g
S01_27687717	1	27687717	1	143.483	ID=Ciclev10007320m.g
S01_28492455	1	28492455	1	152.664	ID=Ciclev10009068m.g
S01_28511164	1	28511164	1	152.664	ID=Ciclev10010826m.g
S01_28532754	1	28532754	1	152.664	ID=Ciclev10010075m.g
S01_28588113	1	28588113	1	152.664	ID=Ciclev10010403m.g
S01_28751816	1	28751816	1	154.516	ID=Ciclev10007695m.g
S01_28776995	1	28776995	1	154.516	ID=Ciclev10010215m.g
S02_6774090	2	6774090	2	0	ID=Ciclev10015576m.g
S02_6778380	2	6778380	2	0	ID=Ciclev10014192m.g
S02_6885306	2	6885306	2	1.667	ID=Ciclev10016322m.g
S02_6903316	2	6903316	2	1.667	ID=Ciclev10015808m.g
S02_6941172	2	6941172	2	1.667	ID=Ciclev10014939m.g
S02_7012425	2	7012425	2	1.667	ID=Ciclev10017500m.g
S02_19842211	2	19842211	2	33.548	ID=Ciclev10014668m.g
S02_21917848	2	21917848	2	41.924	ID=Ciclev10014373m.g
S02_22965328	2	22965328	2	44.989	ID=Ciclev10015493m.g
S02_23764644	2	23764644	2	49.13	ID=Ciclev10015492m.g
S02_24776837	2	24776837	2	53.392	ID=Ciclev10018131m.g
S02_25324691	2	25324691	2	55.934	ID=Ciclev10014088m.g
S02_25522543	2	25522543	2	75.237	ID=Ciclev10018269m.g
S02_25633834	2	25633834	2	75.237	ID=Ciclev10018242m.g
S02_26031705	2	26031705	2	78.903	ID=Ciclev10014821m.g
S02_27021606	2	27021606	2	89.887	ID=Ciclev10015171m.g
S02_27195773	2	27195773	2	96.968	ID=Ciclev10018125m.g
S02_28082828	2	28082828	2	105.982	ID=Ciclev10016251m.g
S02_28939419	2	28939419	2	113.056	ID=Ciclev10014065m.g
S02_28969067	2	28969067	2	113.056	ID=Ciclev10014843m.g
S02_29437209	2	29437209	2	114.723	ID=Ciclev10014085m.g
S02_29538344	2	29538344	2	114.723	ID=Ciclev10015668m.g
S02_29650379	2	29650379	2	114.723	ID=Ciclev10014061m.g
S02_29760006	2	29760006	2	114.723	ID=Ciclev10016366m.g
S02_30000162	2	30000162	2	114.723	ID=Ciclev10014052m.g
S02_30049719	2	30049719	2	118.12	ID=Ciclev10016394m.g
S02_30598362	2	30598362	2	118.12	ID=Ciclev10016196m.g
S02_30849953	2	30849953	2	123.314	ID=Ciclev10015984m.g
S02_30904080	2	30904080	2	123.314	ID=Ciclev10018122m.g
S02_30942547	2	30942547	2	128.507	ID=Ciclev10014133m.g
S02_31894526	2	31894526	2	130.183	ID=Ciclev10017760m.g
S02_31927860	2	31927860	2	131.856	ID=Ciclev10016904m.g
S02_32002184	2	32002184	2	133.528	ID=Ciclev10014983m.g
S02_32075451	2	32075451	2	135.201	ID=Ciclev10016130m.g
S02_32283983	2	32283983	2	136.873	ID=Ciclev10016643m.g
S02_32308358	2	32308358	2	136.873	ID=Ciclev10017157m.g
S02_32843659	2	32843659	2	138.569	ID=Ciclev10015592m.g
S02_32926265	2	32926265	2	138.569	ID=Ciclev10014187m.g
S02_33026060	2	33026060	2	138.569	ID=Ciclev10014112m.g
S02_33247761	2	33247761	2	138.569	ID=Ciclev10015933m.g
S03_3687034	3	3687034	3	0	ID=Ciclev10019026m.g
S03_3858757	3	3858757	3	2.276	ID=Ciclev10019772m.g
S03_4052993	3	4052993	3	6.86	ID=Ciclev10018616m.g
S03_3956389	3	3956389	3	6.86	ID=Ciclev10018473m.g
S03_4124145	3	4124145	3	8.529	ID=Ciclev10019777m.g
S08_17853708	8	17853708	3	10.197	ID=Ciclev10027695m.g
S03_4195669	3	4195669	3	11.866	ID=Ciclev10019499m.g
S03_4155381	3	4155381	3	13.946	ID=Ciclev10024278m.g
S03_5374120	3	5374120	3	20.526	ID=Ciclev10019196m.g
S03_5397061	3	5397061	3	20.526	ID=Ciclev10018892m.g
S03_5509981	3	5509981	3	22.195	ID=Ciclev10019315m.g
S03_5874405	3	5874405	3	25.985	ID=Ciclev10022476m.g
S03_6226351	3	6226351	3	28.138	ID=Ciclev10019076m.g
S03_5432814	3	5432814	3	32.562	ID=Ciclev10018818m.g
S03_6942069	3	6942069	3	40.225	ID=Ciclev10019482m.g
S03_7576692	3	7576692	3	43.124	ID=Ciclev10022490m.g
S03_7792917	3	7792917	3	51.837	ID=Ciclev10019841m.g
S03_7951424	3	7951424	3	54.738	ID=Ciclev10018461m.g
S03_8268140	3	8268140	3	56.536	ID=Ciclev10022497m.g
S03_8862771	3	8862771	3	58.941	ID=Ciclev10021913m.g
S03_9019697	3	9019697	3	63.917	ID=Ciclev10018566m.g
S03_8642668	3	8642668	3	63.917	ID=Ciclev10019790m.g
S03_8843362	3	8843362	3	63.917	ID=Ciclev10019201m.g
S03_9881907	3	9881907	3	65.596	ID=Ciclev10023895m.g
S03_33679413	3	33679413	3	72.672	ID=Ciclev10020201m.g
S03_33749222	3	33749222	3	74.525	ID=Ciclev10018724m.g
S03_30868014	3	30868014	3	83.493	ID=Ciclev10021233m.g
S03_10898832	3	10898832	3	92.445	ID=Ciclev10018922m.g
S03_11412180	3	11412180	3	94.112	ID=Ciclev10018947m.g
S03_11509117	3	11509117	3	97.503	ID=Ciclev10018464m.g
S03_13226646	3	13226646	3	99.171	ID=Ciclev10018879m.g
S03_16436655	3	16436655	3	99.171	ID=Ciclev10018592m.g
S03_18826689	3	18826689	3	100.838	ID=Ciclev10021039m.g
S03_18960504	3	18960504	3	100.838	ID=Ciclev10020311m.g
S03_22081343	3	22081343	3	109.79	ID=Ciclev10024511m.g
S09_29013556	9	29013556	3	109.79	ID=Ciclev10004124m.g
S03_21766712	3	21766712	3	109.79	ID=Ciclev10024345m.g
S03_25319532	3	25319532	3	112.014	ID=Ciclev10018594m.g
S03_24899680	3	24899680	3	112.014	ID=Ciclev10020147m.g
S03_21814687	3	21814687	3	116.6	ID=Ciclev10024358m.g
S03_21921563	3	21921563	3	116.6	ID=Ciclev10018760m.g
S03_24756994	3	24756994	3	121.777	ID=Ciclev10018885m.g
S03_24967194	3	24967194	3	121.777	ID=Ciclev10024611m.g
S04_10582718	4	10582718	3	126.955	ID=Ciclev10033279m.g
S03_27185376	3	27185376	3	126.955	ID=Ciclev10018865m.g
S03_27253390	3	27253390	3	126.955	ID=Ciclev10023613m.g
S03_37127543	3	37127543	3	133.984	ID=Ciclev10024050m.g
S03_37154233	3	37154233	3	133.984	ID=Ciclev10024176m.g
S03_39037995	3	39037995	3	142.113	ID=Ciclev10023340m.g
S03_39402669	3	39402669	3	142.113	ID=Ciclev10024181m.g
S03_39622190	3	39622190	3	148.077	ID=Ciclev10021532m.g
S03_40110353	3	40110353	3	148.077	ID=Ciclev10021732m.g
S03_41697624	3	41697624	3	151.478	ID=Ciclev10024637m.g
S03_41581682	3	41581682	3	151.478	ID=Ciclev10021716m.g
S03_41316130	3	41316130	3	151.478	ID=Ciclev10018850m.g
S03_42920283	3	42920283	3	162.454	ID=Ciclev10021493m.g
S03_43420965	3	43420965	3	164.471	ID=Ciclev10021699m.g
S03_44125894	3	44125894	3	168.598	ID=Ciclev10019959m.g
S03_45148656	3	45148656	3	172.712	ID=Ciclev10018730m.g
S03_44995940	3	44995940	3	174.386	ID=Ciclev10018843m.g
S03_44548514	3	44548514	3	177.796	ID=Ciclev10019087m.g
S03_45712095	3	45712095	3	181.201	ID=Ciclev10018482m.g
S03_46693444	3	46693444	3	183.889	ID=Ciclev10019644m.g
S03_45992925	3	45992925	3	189.501	ID=Ciclev10023723m.g
S03_46443520	3	46443520	3	191.524	ID=Ciclev10018936m.g
S03_47596044	3	47596044	3	200.516	ID=Ciclev10018449m.g
S03_47901346	3	47901346	3	200.516	ID=Ciclev10018638m.g
S03_47585078	3	47585078	3	202.193	ID=Ciclev10020210m.g
S03_47388743	3	47388743	3	207.395	ID=Ciclev10022564m.g
S03_47708693	3	47708693	3	210.792	ID=Ciclev10020168m.g
S03_50005808	3	50005808	3	225.643	ID=Ciclev10022917m.g
S03_49887003	3	49887003	3	225.643	ID=Ciclev10024598m.g
S03_49846466	3	49846466	3	228.504	ID=Ciclev10024592m.g
S03_50768675	3	50768675	3	231.297	ID=Ciclev10018805m.g
S03_50636493	3	50636493	3	231.297	ID=Ciclev10022525m.g
S04_59320	4	59320	4	0	ID=Ciclev10033472m.g
S04_198356	4	198356	4	7.873	ID=Ciclev10030787m.g
S04_316443	4	316443	4	9.671	ID=Ciclev10030803m.g
S04_381014	4	381014	4	12.391	ID=Ciclev10033808m.g
S04_584532	4	584532	4	15.098	ID=Ciclev10031682m.g
S04_675715	4	675715	4	15.098	ID=Ciclev10030588m.g
S04_634976	4	634976	4	18.74	ID=Ciclev10030516m.g
S04_642286	4	642286	4	18.74	ID=Ciclev10031443m.g
S04_1139101	4	1139101	4	24.301	ID=Ciclev10031576m.g
S04_859028	4	859028	4	24.301	ID=Ciclev10032032m.g
S04_868982	4	868982	4	27.073	ID=Ciclev10033509m.g
S04_964598	4	964598	4	27.073	ID=Ciclev10031175m.g
S04_1260479	4	1260479	4	32.918	ID=Ciclev10031811m.g
S04_1773768	4	1773768	4	37.214	ID=Ciclev10030811m.g
S04_1793199	4	1793199	4	39.003	ID=Ciclev10032052m.g
S04_1794883	4	1794883	4	40.79	ID=Ciclev10033159m.g
S04_2710371	4	2710371	4	42.576	ID=Ciclev10030893m.g
S04_2408652	4	2408652	4	46.218	ID=Ciclev10033331m.g
S04_2264393	4	2264393	4	48.007	ID=Ciclev10030625m.g
S04_1829118	4	1829118	4	48.007	ID=Ciclev10032836m.g
S04_2243999	4	2243999	4	48.007	ID=Ciclev10030981m.g
S04_2717289	4	2717289	4	49.795	ID=Ciclev10030928m.g
S04_2863683	4	2863683	4	53.436	ID=Ciclev10032714m.g
S04_2927871	4	2927871	4	53.436	ID=Ciclev10032889m.g
S04_3209633	4	3209633	4	53.436	ID=Ciclev10030779m.g
S04_3244651	4	3244651	4	53.436	ID=Ciclev10033309m.g
S04_3612718	4	3612718	4	55.222	ID=Ciclev10031306m.g
S04_3790493	4	3790493	4	55.222	ID=Ciclev10031113m.g
S04_3902616	4	3902616	4	55.282	ID=Ciclev10033259m.g
S04_6089418	4	6089418	4	57.01	ID=Ciclev10033298m.g
S04_6370037	4	6370037	4	60.653	ID=Ciclev10031933m.g
S04_6811998	4	6811998	4	60.653	ID=Ciclev10031516m.g
S04_7027659	4	7027659	4	60.653	ID=Ciclev10030988m.g
S04_7334362	4	7334362	4	64.292	ID=Ciclev10033678m.g
S04_7197216	4	7197216	4	65.381	ID=Ciclev10031606m.g
S04_9170612	4	9170612	4	66.064	ID=Ciclev10033801m.g
S04_7382463	4	7382463	4	66.064	ID=Ciclev10031452m.g
S04_14071520	4	14071520	4	73.625	ID=Ciclev10030628m.g
S04_14511886	4	14511886	4	73.625	ID=Ciclev10030757m.g
S04_14423246	4	14423246	4	73.625	ID=Ciclev10031185m.g
S03_666739	3	666739	4	73.625	ID=Ciclev10018519m.g
S04_12323587	4	12323587	4	73.625	ID=Ciclev10032646m.g
S04_14038355	4	14038355	4	73.625	ID=Ciclev10030627m.g
S04_14165683	4	14165683	4	73.625	ID=Ciclev10030813m.g
S04_14046567	4	14046567	4	73.625	ID=Ciclev10033491m.g
S02_4036518	2	4036518	4	73.625	ID=Ciclev10015763m.g
S04_14762069	4	14762069	4	73.625	ID=Ciclev10031361m.g
S04_15046664	4	15046664	4	75.412	ID=Ciclev10031028m.g
S04_15172607	4	15172607	4	75.412	ID=Ciclev10033243m.g
S04_15203655	4	15203655	4	77.198	ID=Ciclev10031115m.g
S04_14438532	4	14438532	4	77.198	ID=Ciclev10030606m.g
S04_14328796	4	14328796	4	77.198	ID=Ciclev10033814m.g
S04_14677666	4	14677666	4	77.198	ID=Ciclev10032791m.g
S04_12356216	4	12356216	4	77.198	ID=Ciclev10032864m.g
S04_14461796	4	14461796	4	77.198	ID=Ciclev10030921m.g
S04_12922417	4	12922417	4	77.198	ID=Ciclev10033645m.g
S04_15049272	4	15049272	4	77.198	ID=Ciclev10031739m.g
S04_15280179	4	15280179	4	77.198	ID=Ciclev10031282m.g
S04_13905015	4	13905015	4	77.198	ID=Ciclev10030650m.g
S04_16085725	4	16085725	4	77.198	ID=Ciclev10033869m.g
S04_19092743	4	19092743	4	82.759	ID=Ciclev10032493m.g
S04_17795060	4	17795060	4	82.759	ID=Ciclev10033437m.g
S04_19049128	4	19049128	4	82.759	ID=Ciclev10031476m.g
S04_16339650	4	16339650	4	82.759	ID=Ciclev10030603m.g
S04_16519720	4	16519720	4	82.759	ID=Ciclev10031135m.g
S04_18659012	4	18659012	4	82.759	ID=Ciclev10033525m.g
S04_17800370	4	17800370	4	82.759	ID=Ciclev10032005m.g
S04_19420069	4	19420069	4	91.216	ID=Ciclev10031397m.g
S04_20045963	4	20045963	4	100.942	ID=Ciclev10033580m.g
S04_20906282	4	20906282	4	103.831	ID=Ciclev10030493m.g
S04_20723608	4	20723608	4	103.831	ID=Ciclev10033781m.g
S04_21629642	4	21629642	4	105.618	ID=Ciclev10031257m.g
S04_21362418	4	21362418	4	105.618	ID=Ciclev10031347m.g
S04_21181265	4	21181265	4	107.405	ID=Ciclev10033913m.g
S04_21955586	4	21955586	4	109.196	ID=Ciclev10033411m.g
S04_22086968	4	22086968	4	110.985	ID=Ciclev10033123m.g
S04_22416855	4	22416855	4	110.987	ID=Ciclev10032926m.g
S04_22612244	4	22612244	4	114.629	ID=Ciclev10033458m.g
S04_22347717	4	22347717	4	116.419	ID=Ciclev10030794m.g
S04_21992170	4	21992170	4	118.514	ID=Ciclev10032380m.g
S04_23375997	4	23375997	4	130.023	ID=Ciclev10033337m.g
S04_23203515	4	23203515	4	130.023	ID=Ciclev10030551m.g
S04_23209008	4	23209008	4	130.023	ID=Ciclev10030507m.g
S04_23246578	4	23246578	4	130.023	ID=Ciclev10030976m.g
S04_23268179	4	23268179	4	130.023	ID=Ciclev10030999m.g
S04_24067545	4	24067545	4	139.668	ID=Ciclev10030675m.g
S04_25050901	4	25050901	4	139.668	ID=Ciclev10031896m.g
S04_24949892	4	24949892	4	139.668	ID=Ciclev10033817m.g
S04_25548240	4	25548240	4	143.306	ID=Ciclev10033633m.g
S04_25467223	4	25467223	4	143.306	ID=Ciclev10030635m.g
S04_25359868	4	25359868	4	143.306	ID=Ciclev10031826m.g
S04_25232341	4	25232341	4	145.094	ID=Ciclev10033853m.g
S04_25593241	4	25593241	4	146.881	ID=Ciclev10033595m.g
S04_25119807	4	25119807	4	146.881	ID=Ciclev10031170m.g
S04_24780978	4	24780978	4	149.228	ID=Ciclev10030586m.g
S04_24688301	4	24688301	4	149.228	ID=Ciclev10031389m.g
S04_24742800	4	24742800	4	154.597	ID=Ciclev10032994m.g
S05_478920	5	478920	5	0	ID=Ciclev10000657m.g
S05_263132	5	263132	5	5.268	ID=Ciclev10002464m.g
S05_2046191	5	2046191	5	5.268	ID=Ciclev10000216m.g
S05_113701	5	113701	5	5.268	ID=Ciclev10000600m.g
S05_598359	5	598359	5	6.288	ID=Ciclev10000109m.g
S05_287702	5	287702	5	6.922	ID=Ciclev10001802m.g
S05_834208	5	834208	5	6.922	ID=Ciclev10000869m.g
S05_2476340	5	2476340	5	10.315	ID=Ciclev10000427m.g
S05_2202098	5	2202098	5	10.315	ID=Ciclev10000456m.g
S05_3490768	5	3490768	5	11.984	ID=Ciclev10003345m.g
S05_3514227	5	3514227	5	11.984	ID=Ciclev10003972m.g
S05_5838417	5	5838417	5	20.937	ID=Ciclev10003600m.g
S05_6483047	5	6483047	5	22.605	ID=Ciclev10000702m.g
S05_8360132	5	8360132	5	25.998	ID=Ciclev10002201m.g
S05_8643904	5	8643904	5	25.998	ID=Ciclev10000024m.g
S05_20933381	5	20933381	5	33.028	ID=Ciclev10002295m.g
S05_19034218	5	19034218	5	33.028	ID=Ciclev10003129m.g
S05_20820688	5	20820688	5	33.028	ID=Ciclev10002378m.g
S05_26146784	5	26146784	5	44.007	ID=Ciclev10003207m.g
S05_27376540	5	27376540	5	45.689	ID=Ciclev10003137m.g
S05_25967138	5	25967138	5	45.695	ID=Ciclev10000735m.g
S05_25843225	5	25843225	5	45.695	ID=Ciclev10000944m.g
S05_25877697	5	25877697	5	45.695	ID=Ciclev10001344m.g
S05_29129984	5	29129984	5	49.09	ID=Ciclev10000893m.g
S05_29693342	5	29693342	5	52.485	ID=Ciclev10000348m.g
S05_29850237	5	29850237	5	52.485	ID=Ciclev10003382m.g
S05_30528148	5	30528148	5	55.881	ID=Ciclev10002937m.g
S05_30839319	5	30839319	5	59.661	ID=Ciclev10001604m.g
S05_31634928	5	31634928	5	74.191	ID=Ciclev10000179m.g
S05_32774195	5	32774195	5	76.058	ID=Ciclev10000202m.g
S05_33220895	5	33220895	5	76.058	ID=Ciclev10000982m.g
S05_32549750	5	32549750	5	76.058	ID=Ciclev10001229m.g
S05_33394480	5	33394480	5	79.45	ID=Ciclev10002007m.g
S05_33705664	5	33705664	5	79.45	ID=Ciclev10003191m.g
S05_33985308	5	33985308	5	81.117	ID=Ciclev10003420m.g
S05_34179449	5	34179449	5	81.117	ID=Ciclev10003854m.g
S05_35521985	5	35521985	5	82.784	ID=Ciclev10001318m.g
S05_35118372	5	35118372	5	82.784	ID=Ciclev10000073m.g
S05_35660846	5	35660846	5	84.609	ID=Ciclev10002205m.g
S05_35897640	5	35897640	5	86.643	ID=Ciclev10003510m.g
S05_37048667	5	37048667	5	103.464	ID=Ciclev10000313m.g
S05_37123343	5	37123343	5	103.464	ID=Ciclev10001037m.g
S05_37091522	5	37091522	5	103.464	ID=Ciclev10000652m.g
S05_37315469	5	37315469	5	103.464	ID=Ciclev10003517m.g
S05_37639069	5	37639069	5	108.642	ID=Ciclev10000736m.g
S05_37570889	5	37570889	5	110.316	ID=Ciclev10000010m.g
S05_37821300	5	37821300	5	115.608	ID=Ciclev10000005m.g
S05_38659929	5	38659929	5	118.148	ID=Ciclev10000593m.g
S05_38347207	5	38347207	5	118.148	ID=Ciclev10001443m.g
S05_38150240	5	38150240	5	118.148	ID=Ciclev10001753m.g
S05_38469518	5	38469518	5	124.122	ID=Ciclev10002106m.g
S05_39301459	5	39301459	5	127.517	ID=Ciclev10002068m.g
S05_39929037	5	39929037	5	131.926	ID=Ciclev10001636m.g
S05_39858985	5	39858985	5	131.926	ID=Ciclev10000651m.g
S05_39694014	5	39694014	5	135.193	ID=Ciclev10000804m.g
S05_41139108	5	41139108	5	145.38	ID=Ciclev10000483m.g
S05_40876126	5	40876126	5	145.38	ID=Ciclev10000910m.g
S06_6172051	6	6172051	6	0	ID=Ciclev10013854m.g
S06_12995157	6	12995157	6	5.57	ID=Ciclev10012001m.g
S06_11412517	6	11412517	6	8.226	ID=Ciclev10011495m.g
S06_10236328	6	10236328	6	10.801	ID=Ciclev10011194m.g
S06_6817114	6	6817114	6	10.801	ID=Ciclev10011454m.g
S06_12237196	6	12237196	6	10.801	ID=Ciclev10012157m.g
S06_1854693	6	1854693	6	10.801	ID=Ciclev10011527m.g
S06_11103054	6	11103054	6	10.801	ID=Ciclev10012548m.g
S06_7809349	6	7809349	6	11.656	ID=Ciclev10012906m.g
S06_6183348	6	6183348	6	12.511	ID=Ciclev10012634m.g
S06_10036597	6	10036597	6	12.511	ID=Ciclev10010923m.g
S06_7874714	6	7874714	6	13.363	ID=Ciclev10011634m.g
S06_12704873	6	12704873	6	14.222	ID=Ciclev10011951m.g
S06_434944	6	434944	6	15.08	ID=Ciclev10013842m.g
S06_9297331	6	9297331	6	15.933	ID=Ciclev10013851m.g
S06_11462087	6	11462087	6	15.933	ID=Ciclev10011862m.g
S06_13425421	6	13425421	6	15.933	ID=Ciclev10012277m.g
S06_497155	6	497155	6	19.443	ID=Ciclev10011912m.g
S06_7125989	6	7125989	6	19.443	ID=Ciclev10012732m.g
S06_11704723	6	11704723	6	21.17	ID=Ciclev10012554m.g
S06_1942988	6	1942988	6	22.893	ID=Ciclev10010916m.g
S06_7803973	6	7803973	6	22.893	ID=Ciclev10012397m.g
S06_547770	6	547770	6	22.893	ID=Ciclev10010929m.g
S06_11597766	6	11597766	6	22.893	ID=Ciclev10010897m.g
S06_10488380	6	10488380	6	22.893	ID=Ciclev10011997m.g
S06_9545096	6	9545096	6	22.893	ID=Ciclev10013718m.g
S06_8284587	6	8284587	6	22.893	ID=Ciclev10011737m.g
S06_12673030	6	12673030	6	24.619	ID=Ciclev10011445m.g
S06_67124	6	67124	6	26.344	ID=Ciclev10013905m.g
S06_11142919	6	11142919	6	26.344	ID=Ciclev10011496m.g
S06_10520920	6	10520920	6	26.344	ID=Ciclev10011672m.g
S08_16675906	8	16675906	6	26.344	ID=Ciclev10028674m.g
S08_16548478	8	16548478	6	26.344	ID=Ciclev10028530m.g
S06_1109843	6	1109843	6	27.199	ID=Ciclev10011295m.g
S06_12552313	6	12552313	6	28.055	ID=Ciclev10011715m.g
S06_2028031	6	2028031	6	28.055	ID=Ciclev10013638m.g
S06_6334460	6	6334460	6	28.055	ID=Ciclev10011420m.g
S06_5773811	6	5773811	6	28.055	ID=Ciclev10013516m.g
S06_9686010	6	9686010	6	30.226	ID=Ciclev10011376m.g
S06_14402785	6	14402785	6	34.68	ID=Ciclev10012000m.g
S06_14679690	6	14679690	6	36.843	ID=Ciclev10012493m.g
S06_17510041	6	17510041	6	52.127	ID=Ciclev10013499m.g
S06_17835964	6	17835964	6	54.323	ID=Ciclev10011331m.g
S06_17837547	6	17837547	6	54.323	ID=Ciclev10012066m.g
S06_18050816	6	18050816	6	60.699	ID=Ciclev10011085m.g
S06_18370599	6	18370599	6	67.069	ID=Ciclev10011572m.g
S06_18727456	6	18727456	6	68.809	ID=Ciclev10011385m.g
S06_19160290	6	19160290	6	70.544	ID=Ciclev10013737m.g
S06_19411339	6	19411339	6	72.284	ID=Ciclev10011545m.g
S06_19722643	6	19722643	6	75.581	ID=Ciclev10013876m.g
S06_19621621	6	19621621	6	78.889	ID=Ciclev10011945m.g
S06_20132087	6	20132087	6	82.179	ID=Ciclev10012455m.g
S06_19712134	6	19712134	6	82.179	ID=Ciclev10013007m.g
S06_20271006	6	20271006	6	82.18	ID=Ciclev10012797m.g
S06_20545773	6	20545773	6	86.53	ID=Ciclev10011609m.g
S06_20655993	6	20655993	6	88.654	ID=Ciclev10012247m.g
S06_20822896	6	20822896	6	88.654	ID=Ciclev10011627m.g
S06_21165558	6	21165558	6	94.994	ID=Ciclev10013017m.g
S06_21768932	6	21768932	6	103.175	ID=Ciclev10010989m.g
S06_21496705	6	21496705	6	106.399	ID=Ciclev10013010m.g
S06_25193819	6	25193819	6	115.663	ID=Ciclev10010991m.g
S06_23780859	6	23780859	6	115.663	ID=Ciclev10013726m.g
S06_24679060	6	24679060	6	117.39	ID=Ciclev10013770m.g
S06_23921861	6	23921861	6	119.115	ID=Ciclev10010885m.g
S06_24322387	6	24322387	6	119.115	ID=Ciclev10010936m.g
S06_25254271	6	25254271	6	120.84	ID=Ciclev10010958m.g
S06_24147535	6	24147535	6	123.454	ID=Ciclev10010995m.g
S06_24767234	6	24767234	6	126.065	ID=Ciclev10011709m.g
S06_23939498	6	23939498	6	126.066	ID=Ciclev10012892m.g
S06_24440235	6	24440235	6	126.066	ID=Ciclev10011199m.g
S06_24188615	6	24188615	6	126.066	ID=Ciclev10013597m.g
S06_23041131	6	23041131	6	126.921	ID=Ciclev10013755m.g
S06_22804828	6	22804828	6	127.775	ID=Ciclev10010910m.g
S03_23487944	3	23487944	6	127.775	ID=Ciclev10024661m.g
S06_22485541	6	22485541	6	127.775	ID=Ciclev10013828m.g
S06_23619085	6	23619085	6	127.775	ID=Ciclev10013175m.g
S06_21927823	6	21927823	6	127.775	ID=Ciclev10013654m.g
S06_23001602	6	23001602	6	127.775	ID=Ciclev10011179m.g
S06_23068547	6	23068547	6	133.235	ID=Ciclev10011430m.g
S06_22525889	6	22525889	6	133.235	ID=Ciclev10011546m.g
S06_23147646	6	23147646	6	133.235	ID=Ciclev10012575m.g
S07_31008	7	31008	7	0	ID=Ciclev10025351m.g
S07_540443	7	540443	7	0	ID=Ciclev10024840m.g
S07_869201	7	869201	7	3.391	ID=Ciclev10025759m.g
S07_926250	7	926250	7	3.391	ID=Ciclev10027108m.g
S07_877476	7	877476	7	3.391	ID=Ciclev10026691m.g
S07_1310473	7	1310473	7	5.06	ID=Ciclev10026549m.g
S07_1363046	7	1363046	7	9.247	ID=Ciclev10027574m.g
S07_1678038	7	1678038	7	11.292	ID=Ciclev10025725m.g
S07_1942759	7	1942759	7	14.398	ID=Ciclev10025926m.g
S07_2032631	7	2032631	7	16.706	ID=Ciclev10026226m.g
S07_2133318	7	2133318	7	19.009	ID=Ciclev10025093m.g
S07_2074830	7	2074830	7	19.009	ID=Ciclev10025149m.g
S07_2278993	7	2278993	7	23.755	ID=Ciclev10025963m.g
S07_2228812	7	2228812	7	23.755	ID=Ciclev10025048m.g
S07_2608149	7	2608149	7	30.796	ID=Ciclev10026303m.g
S07_3149760	7	3149760	7	32.472	ID=Ciclev10024681m.g
S07_3137839	7	3137839	7	32.472	ID=Ciclev10026429m.g
S07_4114176	7	4114176	7	34.146	ID=Ciclev10024730m.g
S07_4243356	7	4243356	7	35.82	ID=Ciclev10027120m.g
S07_4337210	7	4337210	7	35.82	ID=Ciclev10026641m.g
S07_4584302	7	4584302	7	35.82	ID=Ciclev10025260m.g
S07_4822906	7	4822906	7	39.822	ID=Ciclev10024875m.g
S07_4589575	7	4589575	7	39.822	ID=Ciclev10025588m.g
S07_5361896	7	5361896	7	47.459	ID=Ciclev10025455m.g
S07_5774466	7	5774466	7	51.475	ID=Ciclev10025026m.g
S07_5803212	7	5803212	7	51.475	ID=Ciclev10027599m.g
S07_5997050	7	5997050	7	54.866	ID=Ciclev10025152m.g
S07_5847409	7	5847409	7	54.866	ID=Ciclev10024761m.g
S07_5985765	7	5985765	7	54.866	ID=Ciclev10024878m.g
S07_5964026	7	5964026	7	54.866	ID=Ciclev10025161m.g
S07_6824995	7	6824995	7	59.463	ID=Ciclev10024696m.g
S07_6818695	7	6818695	7	59.463	ID=Ciclev10025353m.g
S07_6871314	7	6871314	7	61.695	ID=Ciclev10025998m.g
S07_8395126	7	8395126	7	65.094	ID=Ciclev10024743m.g
S07_7642167	7	7642167	7	65.094	ID=Ciclev10025604m.g
S07_8909809	7	8909809	7	73.684	ID=Ciclev10027173m.g
S07_9956446	7	9956446	7	75.68	ID=Ciclev10024839m.g
S07_9170423	7	9170423	7	75.68	ID=Ciclev10024988m.g
S07_10010136	7	10010136	7	75.68	ID=Ciclev10025498m.g
S07_9538028	7	9538028	7	75.68	ID=Ciclev10025245m.g
S07_10751343	7	10751343	7	80.859	ID=Ciclev10026835m.g
S07_10807662	7	10807662	7	80.859	ID=Ciclev10025851m.g
S07_13368456	7	13368456	7	88.002	ID=Ciclev10025693m.g
S07_14137140	7	14137140	7	91.358	ID=Ciclev10024841m.g
S07_12999657	7	12999657	7	91.358	ID=Ciclev10024946m.g
S07_13833581	7	13833581	7	95.966	ID=Ciclev10027021m.g
S07_14284267	7	14284267	7	98.201	ID=Ciclev10026151m.g
S07_14643946	7	14643946	7	99.874	ID=Ciclev10025681m.g
S07_14385687	7	14385687	7	99.874	ID=Ciclev10024814m.g
S07_15091727	7	15091727	7	105.056	ID=Ciclev10026430m.g
S04_5802709	4	5802709	7	105.056	ID=Ciclev10030470m.g
S07_15100404	7	15100404	7	106.933	ID=Ciclev10026162m.g
S07_15212820	7	15212820	7	108.817	ID=Ciclev10027095m.g
S05_17808301	5	17808301	7	120.668	ID=Ciclev10003286m.g
S05_18160081	5	18160081	7	120.668	ID=Ciclev10000740m.g
S07_18436704	7	18436704	7	126.576	ID=Ciclev10027629m.g
S07_20114847	7	20114847	7	132.042	ID=Ciclev10025730m.g
S07_20104451	7	20104451	7	132.042	ID=Ciclev10024684m.g
S07_20305471	7	20305471	7	133.929	ID=Ciclev10026247m.g
S07_20540492	7	20540492	7	133.929	ID=Ciclev10027510m.g
S08_1493068	8	1493068	8	0	ID=Ciclev10028513m.g
S08_1359809	8	1359809	8	0	ID=Ciclev10028967m.g
S08_1649129	8	1649129	8	0	ID=Ciclev10027661m.g
S08_1422214	8	1422214	8	0	ID=Ciclev10028083m.g
S08_826272	8	826272	8	5.46	ID=Ciclev10029887m.g
S08_999173	8	999173	8	5.46	ID=Ciclev10028931m.g
S08_689245	8	689245	8	7.215	ID=Ciclev10028093m.g
S08_864884	8	864884	8	7.215	ID=Ciclev10029529m.g
S08_503462	8	503462	8	10.787	ID=Ciclev10029088m.g
S08_109287	8	109287	8	10.787	ID=Ciclev10028022m.g
S08_112996	8	112996	8	10.787	ID=Ciclev10028471m.g
S08_47411	8	47411	8	10.787	ID=Ciclev10028825m.g
S08_286783	8	286783	8	10.787	ID=Ciclev10028003m.g
S08_294978	8	294978	8	10.787	ID=Ciclev10028938m.g
S08_146252	8	146252	8	10.787	ID=Ciclev10028691m.g
S08_1041921	8	1041921	8	14.36	ID=Ciclev10027670m.g
S08_1006651	8	1006651	8	14.36	ID=Ciclev10027936m.g
S08_832105	8	832105	8	14.36	ID=Ciclev10030163m.g
S08_1165513	8	1165513	8	16.115	ID=Ciclev10028863m.g
S08_927557	8	927557	8	16.115	ID=Ciclev10028228m.g
S08_661020	8	661020	8	16.115	ID=Ciclev10028731m.g
S08_1204715	8	1204715	8	16.115	ID=Ciclev10027976m.g
S08_1095478	8	1095478	8	16.115	ID=Ciclev10027859m.g
S08_791814	8	791814	8	16.115	ID=Ciclev10028457m.g
S08_1214214	8	1214214	8	19.688	ID=Ciclev10029600m.g
S08_1241936	8	1241936	8	19.688	ID=Ciclev10029765m.g
S08_1640724	8	1640724	8	21.442	ID=Ciclev10027822m.g
S08_1605876	8	1605876	8	21.442	ID=Ciclev10028366m.g
S08_1618894	8	1618894	8	21.442	ID=Ciclev10030142m.g
S08_1433038	8	1433038	8	21.442	ID=Ciclev10028868m.g
S08_1411532	8	1411532	8	21.442	ID=Ciclev10027748m.g
S08_1716603	8	1716603	8	23.197	ID=Ciclev10028052m.g
S08_1814724	8	1814724	8	23.197	ID=Ciclev10029877m.g
S08_1796166	8	1796166	8	23.197	ID=Ciclev10030194m.g
S08_2429542	8	2429542	8	26.771	ID=Ciclev10028186m.g
S08_2529040	8	2529040	8	27.705	ID=Ciclev10029973m.g
S08_2107212	8	2107212	8	28.512	ID=Ciclev10028015m.g
S08_2289097	8	2289097	8	28.512	ID=Ciclev10028343m.g
S08_2172917	8	2172917	8	28.512	ID=Ciclev10029274m.g
S08_2263871	8	2263871	8	28.512	ID=Ciclev10028649m.g
S08_2188117	8	2188117	8	28.512	ID=Ciclev10029597m.g
S08_2720245	8	2720245	8	30.267	ID=Ciclev10028040m.g
S08_2850376	8	2850376	8	30.267	ID=Ciclev10027734m.g
S08_2844093	8	2844093	8	30.267	ID=Ciclev10027715m.g
S08_2635803	8	2635803	8	30.267	ID=Ciclev10027853m.g
S08_2854197	8	2854197	8	30.267	ID=Ciclev10030127m.g
S08_2788922	8	2788922	8	30.267	ID=Ciclev10029184m.g
S08_2818887	8	2818887	8	30.267	ID=Ciclev10029198m.g
S08_3026111	8	3026111	8	32.615	ID=Ciclev10028435m.g
S08_3000113	8	3000113	8	37.459	ID=Ciclev10027863m.g
S08_2971896	8	2971896	8	37.459	ID=Ciclev10027850m.g
S08_3494245	8	3494245	8	39.217	ID=Ciclev10028454m.g
S08_4026112	8	4026112	8	40.974	ID=Ciclev10028201m.g
S08_5326450	8	5326450	8	46.436	ID=Ciclev10028904m.g
S08_3701588	8	3701588	8	46.436	ID=Ciclev10027659m.g
S08_3998172	8	3998172	8	46.436	ID=Ciclev10029698m.g
S08_4892310	8	4892310	8	46.436	ID=Ciclev10028655m.g
S08_4417545	8	4417545	8	46.436	ID=Ciclev10029642m.g
S08_5343601	8	5343601	8	46.436	ID=Ciclev10029896m.g
S08_4871092	8	4871092	8	46.436	ID=Ciclev10029936m.g
S08_3130127	8	3130127	8	46.436	ID=Ciclev10029362m.g
S08_4297257	8	4297257	8	46.436	ID=Ciclev10028264m.g
S08_5052181	8	5052181	8	46.436	ID=Ciclev10030203m.g
S08_4889493	8	4889493	8	46.436	ID=Ciclev10027789m.g
S08_4461663	8	4461663	8	46.436	ID=Ciclev10029365m.g
S08_4553146	8	4553146	8	46.436	ID=Ciclev10029521m.g
S08_5461426	8	5461426	8	46.436	ID=Ciclev10028890m.g
S08_5153846	8	5153846	8	46.436	ID=Ciclev10028494m.g
S08_5469542	8	5469542	8	46.436	ID=Ciclev10030368m.g
S08_5491094	8	5491094	8	46.436	ID=Ciclev10027908m.g
S08_4140439	8	4140439	8	46.436	ID=Ciclev10029477m.g
S08_4969549	8	4969549	8	46.436	ID=Ciclev10028120m.g
S08_5201102	8	5201102	8	46.436	ID=Ciclev10029966m.g
S08_4075187	8	4075187	8	46.436	ID=Ciclev10028081m.g
S08_4555396	8	4555396	8	47.306	ID=Ciclev10029826m.g
S08_2438501	8	2438501	8	48.176	ID=Ciclev10028922m.g
S08_4860794	8	4860794	8	48.176	ID=Ciclev10027804m.g
S08_5896067	8	5896067	8	51.75	ID=Ciclev10029285m.g
S08_5956341	8	5956341	8	53.506	ID=Ciclev10027795m.g
S08_6142645	8	6142645	8	53.506	ID=Ciclev10028670m.g
S08_6050573	8	6050573	8	53.506	ID=Ciclev10027768m.g
S08_6899421	8	6899421	8	53.506	ID=Ciclev10028796m.g
S08_6026790	8	6026790	8	53.506	ID=Ciclev10027952m.g
S08_7354821	8	7354821	8	57.079	ID=Ciclev10029039m.g
S08_7889541	8	7889541	8	57.079	ID=Ciclev10029225m.g
S08_7969048	8	7969048	8	59.28	ID=Ciclev10027800m.g
S09_12220521	9	12220521	8	62.401	ID=Ciclev10004129m.g
S09_14455630	9	14455630	8	62.401	ID=Ciclev10004125m.g
S08_14374136	8	14374136	8	65.974	ID=Ciclev10027821m.g
S09_13316193	9	13316193	8	65.974	ID=Ciclev10005704m.g
S08_12955479	8	12955479	8	66.844	ID=Ciclev10028315m.g
S09_13377446	9	13377446	8	67.714	ID=Ciclev10004979m.g
S03_34838063	3	34838063	8	67.714	ID=Ciclev10020693m.g
S08_15046539	8	15046539	8	67.714	ID=Ciclev10030175m.g
S08_17500054	8	17500054	8	67.714	ID=Ciclev10028402m.g
S09_14406157	9	14406157	8	67.714	ID=Ciclev10004140m.g
S08_13963276	8	13963276	8	68.582	ID=Ciclev10030354m.g
S08_8442079	8	8442079	8	69.453	ID=Ciclev10030161m.g
S03_35357083	3	35357083	8	69.453	ID=Ciclev10018972m.g
S09_13242376	9	13242376	8	70.324	ID=Ciclev10005525m.g
S08_12933198	8	12933198	8	71.192	ID=Ciclev10029860m.g
S08_9913551	8	9913551	8	71.192	ID=Ciclev10028239m.g
S08_17432779	8	17432779	8	72.062	ID=Ciclev10029749m.g
S08_10985632	8	10985632	8	72.932	ID=Ciclev10030243m.g
S08_15392183	8	15392183	8	72.932	ID=Ciclev10027956m.g
S09_13605848	9	13605848	8	72.94	ID=Ciclev10004203m.g
S03_34605853	3	34605853	8	75.59	ID=Ciclev10018643m.g
S08_9625033	8	9625033	8	78.239	ID=Ciclev10029974m.g
S09_11451292	9	11451292	8	78.247	ID=Ciclev10004119m.g
S09_12024152	9	12024152	8	78.247	ID=Ciclev10006553m.g
S09_13043853	9	13043853	8	78.247	ID=Ciclev10005064m.g
S08_10896979	8	10896979	8	78.247	ID=Ciclev10028905m.g
S09_12329281	9	12329281	8	78.247	ID=Ciclev10006572m.g
S08_18745520	8	18745520	8	80.002	ID=Ciclev10027754m.g
S08_18007669	8	18007669	8	80.002	ID=Ciclev10030283m.g
S08_17785184	8	17785184	8	80.002	ID=Ciclev10027700m.g
S08_13554869	8	13554869	8	83.582	ID=Ciclev10029098m.g
S03_7447097	3	7447097	8	85.343	ID=Ciclev10019899m.g
S08_10523167	8	10523167	8	85.343	ID=Ciclev10029296m.g
S08_14935534	8	14935534	8	85.343	ID=Ciclev10030258m.g
S08_7914908	8	7914908	8	87.1	ID=Ciclev10030126m.g
S08_17805504	8	17805504	8	90.675	ID=Ciclev10027942m.g
S08_18863606	8	18863606	8	90.675	ID=Ciclev10029347m.g
S08_17860999	8	17860999	8	90.675	ID=Ciclev10029179m.g
S08_19484009	8	19484009	8	93.334	ID=Ciclev10027862m.g
S08_19394032	8	19394032	8	93.334	ID=Ciclev10028229m.g
S08_19570883	8	19570883	8	95.998	ID=Ciclev10028361m.g
S08_19741034	8	19741034	8	97.763	ID=Ciclev10027891m.g
S08_19818219	8	19818219	8	97.763	ID=Ciclev10027719m.g
S08_20271875	8	20271875	8	101.349	ID=Ciclev10028244m.g
S08_20501245	8	20501245	8	101.349	ID=Ciclev10028164m.g
S08_20481785	8	20481785	8	101.349	ID=Ciclev10028932m.g
S08_21029321	8	21029321	8	101.349	ID=Ciclev10027713m.g
S08_21462224	8	21462224	8	103.11	ID=Ciclev10028099m.g
S08_21560988	8	21560988	8	104.871	ID=Ciclev10027892m.g
S08_21579912	8	21579912	8	104.871	ID=Ciclev10028085m.g
S08_21586066	8	21586066	8	104.871	ID=Ciclev10030284m.g
S08_21834125	8	21834125	8	104.871	ID=Ciclev10030090m.g
S08_22014423	8	22014423	8	106.633	ID=Ciclev10030432m.g
S08_22179096	8	22179096	8	106.633	ID=Ciclev10030205m.g
S08_22380271	8	22380271	8	108.401	ID=Ciclev10027702m.g
S08_22481109	8	22481109	8	108.401	ID=Ciclev10027972m.g
S08_23491657	8	23491657	8	115.843	ID=Ciclev10028570m.g
S08_23922554	8	23922554	8	116.87	ID=Ciclev10028405m.g
S08_23951378	8	23951378	8	117.593	ID=Ciclev10027939m.g
S08_23698069	8	23698069	8	117.593	ID=Ciclev10029397m.g
S08_24256500	8	24256500	8	117.593	ID=Ciclev10028048m.g
S08_23766116	8	23766116	8	117.593	ID=Ciclev10030157m.g
S08_24260613	8	24260613	8	118.026	ID=Ciclev10030046m.g
S08_24263166	8	24263166	8	118.459	ID=Ciclev10029616m.g
S08_24236171	8	24236171	8	118.893	ID=Ciclev10028117m.g
S08_23791570	8	23791570	8	119.325	ID=Ciclev10030042m.g
S08_23773620	8	23773620	8	119.325	ID=Ciclev10030147m.g
S08_23947799	8	23947799	8	120.196	ID=Ciclev10029849m.g
S08_24121120	8	24121120	8	121.066	ID=Ciclev10027683m.g
S08_24153502	8	24153502	8	121.066	ID=Ciclev10028137m.g
S08_23856595	8	23856595	8	121.066	ID=Ciclev10029047m.g
S08_24012392	8	24012392	8	121.066	ID=Ciclev10029453m.g
S08_24319401	8	24319401	8	122.821	ID=Ciclev10029884m.g
S08_24316531	8	24316531	8	122.821	ID=Ciclev10028631m.g
S08_24304124	8	24304124	8	122.822	ID=Ciclev10030097m.g
S08_24346014	8	24346014	8	126.411	ID=Ciclev10028065m.g
S08_24462661	8	24462661	8	131.896	ID=Ciclev10029951m.g
S08_24701701	8	24701701	8	135.486	ID=Ciclev10030370m.g
S08_24705731	8	24705731	8	137.248	ID=Ciclev10027941m.g
S08_24964339	8	24964339	8	144.831	ID=Ciclev10029924m.g
S08_24992754	8	24992754	8	144.831	ID=Ciclev10028485m.g
S08_25035907	8	25035907	8	144.831	ID=Ciclev10028057m.g
S09_216316	9	216316	9	0	ID=Ciclev10005284m.g
S09_375490	9	375490	9	3.648	ID=Ciclev10004187m.g
S09_1301325	9	1301325	9	19.03	ID=Ciclev10005318m.g
S09_1642180	9	1642180	9	20.862	ID=Ciclev10004153m.g
S09_1823544	9	1823544	9	22.694	ID=Ciclev10007035m.g
S09_1896611	9	1896611	9	22.694	ID=Ciclev10006926m.g
S09_2346807	9	2346807	9	22.694	ID=Ciclev10005432m.g
S09_2340896	9	2340896	9	26.092	ID=Ciclev10007121m.g
S09_2284669	9	2284669	9	26.092	ID=Ciclev10004115m.g
S09_2538649	9	2538649	9	26.092	ID=Ciclev10004552m.g
S09_3040164	9	3040164	9	32.4	ID=Ciclev10005035m.g
S09_3331684	9	3331684	9	36.508	ID=Ciclev10005615m.g
S09_3316690	9	3316690	9	36.508	ID=Ciclev10004440m.g
S09_4460987	9	4460987	9	41.695	ID=Ciclev10004951m.g
S09_4383972	9	4383972	9	41.695	ID=Ciclev10006419m.g
S09_3692012	9	3692012	9	45.093	ID=Ciclev10004753m.g
S09_3847675	9	3847675	9	45.093	ID=Ciclev10006599m.g
S09_4660017	9	4660017	9	46.76	ID=Ciclev10007173m.g
S09_4606133	9	4606133	9	46.76	ID=Ciclev10007078m.g
S09_4625005	9	4625005	9	46.76	ID=Ciclev10006968m.g
S09_4657185	9	4657185	9	46.76	ID=Ciclev10004701m.g
S09_5395222	9	5395222	9	50.151	ID=Ciclev10005820m.g
S09_5560231	9	5560231	9	50.151	ID=Ciclev10004803m.g
S09_4684722	9	4684722	9	50.151	ID=Ciclev10006941m.g
S09_4969998	9	4969998	9	50.151	ID=Ciclev10007055m.g
S09_5627681	9	5627681	9	50.151	ID=Ciclev10004847m.g
S09_9808962	9	9808962	9	53.544	ID=Ciclev10005408m.g
S09_22114569	9	22114569	9	55.213	ID=Ciclev10004493m.g
S09_15918070	9	15918070	9	55.213	ID=Ciclev10006793m.g
S09_10333149	9	10333149	9	55.213	ID=Ciclev10004351m.g
S09_22323899	9	22323899	9	55.213	ID=Ciclev10006934m.g
S09_14697132	9	14697132	9	55.213	ID=Ciclev10004255m.g
S09_28043147	9	28043147	9	60.39	ID=Ciclev10004838m.g
S09_27290558	9	27290558	9	60.39	ID=Ciclev10004476m.g
S09_28110760	9	28110760	9	62.056	ID=Ciclev10004870m.g
S09_28739861	9	28739861	9	69.085	ID=Ciclev10004762m.g
S09_29254875	9	29254875	9	76.541	ID=Ciclev10006929m.g
S09_29410378	9	29410378	9	81.358	ID=Ciclev10006134m.g
S09_29643157	9	29643157	9	83.062	ID=Ciclev10006482m.g
S09_29955707	9	29955707	9	88.347	ID=Ciclev10006155m.g
S09_30525399	9	30525399	9	95.388	ID=Ciclev10004921m.g
S09_30855335	9	30855335	9	103.381	ID=Ciclev10006575m.g
S09_31192430	9	31192430	9	103.381	ID=Ciclev10006542m.g

## Sheet: Table S4
Table S4. Phenotypes of pollen traits and polyembryony for Kiyomi, Murcott and the Kiyomi x Murcott progeny.
	No of Pollen Grains per Anther (NPGA)				% of Apparent Pollen Fertility (APF)				% of PE seeds
Genotype	Max.	Min.	Av.	SD	Max.	Min.	Av.	SD
Kiyomi	4.8	0	0.7	1.3	100	0	67	44	0
Murcott	2700	644.4	1767.6	1041	92	76	84	5	100
KM-01	2350	1500	1950	427.2	95	43	73	27	nd
KM-02	123.9	42.2	80.7	41	93	74	82	10	75
KM-03	1588.89	4.16667	864.352	801.022	92.6573	83.3333	87.9953	6.59307	nd
KM-04	2816.7	1400	2069.4	711.5	94	63	80	16	0
KM-05	23.3	0	9	9.9	100	0	64	49	nd
KM-06	1277.8	850	1059.3	214	83	63	75	10	70
KM-07	2.2	0.3	1.2	1	100	100	100	0	nd
KM-08	1170.4	172	567.6	530.1	86	71	80	8	50
KM-09	14322.2	2722.2	7040.7	6342.3	75	63	69	6	nd
KM-10	28.9	3.9	12.8	14	100	38	70	31	0
KM-11	1.3	0	0.6	0.9	60	0	60	42	nd
KM-12	938.9	515.6	708.3	214.2	94	84	91	5	0
KM-13	5863	2235.6	3686.5	1919.4	98	65	84	17	0
KM-14	0.6	0	0.2	0.3	100	0	50	58	0
KM-15	3674.1	12	3171	443.1	78	0	44	39	nd
KM-16	7.4	0	1.9	3.7	100	0	94	54	0
KM-17	1737	942.2	1393.1	408.1	69	63	66	4	nd
KM-18	303.9	0	192.3	91.8	100	0	81	35	100
KM-19	317.8	24.1	197.9	154.1	94	70	83	12	100
KM-20	16.7	0.5	6.3	9	100	0	33	58	100
KM-21	1.7	0.2	1	0.7	100	0	67	58	nd
KM-22	0.2	0	0.1	0.1	100	0	100	58	nd
KM-23	8.9	0	3.1	5	100	0	94	54	nd
KM-24	3613.3	3126	3369.7	344.6	90	80	85	7	100
KM-25	3272.2	1161.1	2223	1055.6	94	92	94	1	25
KM-26	7413.3	1622.2	3930.4	3069.1	71	67	69	2	nd
KM-27	4050	3911.2	2690.4	2235.8	47	41	44	4	0
KM-28	116.1	1.1	29	49.5	89	0	44	32	100
KM-29	2817.8	2805.3	2811.5	8.8	92	88	90	3	100
KM-30	4711.1	1133.3	3026.1	1599.8	87	69	81	8	0
KM-31	1627.8	610	1203.3	529.5	95	89	92	3	nd
KM-32	25.8	0	6.4	9	100	0	81	36	nd
KM-33	2914.8	313.7	1187.3	1496.1	94	0	86	39	0
KM-34	1.7	0	0.6	0.6	100	0	50	52	nd
KM-35	5985.2	1727.8	4071	2160.9	88	64	78	13	78
KM-36	3.9	0	1.1	1.8	80	0	69	36	nd
KM-37	8.9	0	3.7	4.6	100	0	84	51	nd
KM-38	74.4	0	20.6	30.4	100	0	95	40	89
KM-39	6870.4	2722.2	5320.4	1837.6	95	90	92	2	100
KM-40	1	0	0.3	0.6	100	0	100	58	100
KM-41	5411.1	5021.2	5216.1	275.9	93	91	92	1	100
KM-42	6600	1827.8	4661.1	2508.7	91	81	87	5	77
KM-43	1.7	0	0.7	0.9	100	0	50	58	nd
KM-44	2.8	0.6	1.9	1.2	100	0	53	50	nd
KM-45	89.2	0	29.9	51.3	100	0	69	50	81
KM-46	2233.3	1385.2	1809.3	599.7	65	59	62	4	75
KM-47	0.6	0	0.3	0.3	100	0	100	55	0
KM-48	2585.2	1118.5	1904	738.9	92	89	90	2	0
KM-49	2674.1	1677.8	2142	501.6	90	72	80	9	92
KM-50	2805.6	1053.3	1678.9	977.7	77	55	64	10	nd
KM-51	559.3	23.3	230	288.2	95	52	72	21	nd
KM-52	3.3	0.6	1.7	1.5	100	0	56	51	0
KM-53	1438.9	223.1	681.2	661	92	67	78	13	14
Max. Correspond with the maximun number, Min. Minimun number, Av. Average and SD standard desviation; PE: Polyembryonic; nd. No data.

## Sheet: Table S5
Table S5. Markers associated with the Number of pollen grains per anther (NPGA) and with Polyembryony (PE) in the Murcott gametes map.
Trait	Marker	p-value	R2	LOD score	Linkage Group	Phisical position	Genetic position	Gene
NPGA	S08_4417545	1.0204e-10	0.60861	9.99123	8	4417545	46.436	ID=Ciclev10029642m.g
NPGA	S08_4969549	1.2904e-09	0.57082	8.88928	8	4969549	46.436	ID=Ciclev10028120m.g
NPGA	S08_3494245	1.3764e-09	0.55336	8.86126	8	3494245	39.217	ID=Ciclev10028454m.g
NPGA	S08_5326450	1.6502e-09	0.55787	8.78246	8	5326450	46.436	ID=Ciclev10028904m.g
NPGA	S08_4461663	3.0183e-09	0.53038	8.52024	8	4461663	46.436	ID=Ciclev10029365m.g
NPGA	S08_5469542	3.0183e-09	0.53038	8.52024	8	5469542	46.436	ID=Ciclev10030368m.g
NPGA	S08_4889493	4.2373e-09	0.53136	8.37291	8	4889493	46.436	ID=Ciclev10027789m.g
NPGA	S08_4026112	4.7415e-09	0.52143	8.32408	8	4026112	40.974	ID=Ciclev10028201m.g
NPGA	S08_5201102	4.8053e-09	0.52116	8.31828	8	5201102	46.436	ID=Ciclev10029966m.g
NPGA	S08_5491094	4.8053e-09	0.52116	8.31828	8	5491094	46.436	ID=Ciclev10027908m.g
NPGA	S08_4297257	4.8553e-09	0.52095	8.31378	8	4297257	46.436	ID=Ciclev10028264m.g
NPGA	S08_4860794	4.8591e-09	0.52094	8.31344	8	4860794	48.176	ID=Ciclev10027804m.g
NPGA	S08_5153846	4.8593e-09	0.52094	8.31343	8	5153846	46.436	ID=Ciclev10028494m.g
NPGA	S08_5461426	6.1182e-09	0.52395	8.21338	8	5461426	46.436	ID=Ciclev10028890m.g
NPGA	S08_5343601	6.9212e-09	0.52144	8.15982	8	5343601	46.436	ID=Ciclev10029896m.g
NPGA	S08_6050573	7.1821e-09	0.50563	8.14375	8	6050573	53.506	ID=Ciclev10027768m.g
NPGA	S08_6899421	7.1821e-09	0.50563	8.14375	8	6899421	53.506	ID=Ciclev10028796m.g
NPGA	S08_3130127	9.8487e-09	0.51418	8.00662	8	3130127	46.436	ID=Ciclev10029362m.g
NPGA	S08_4555396	9.8515e-09	0.51418	8.0065	8	4555396	47.306	ID=Ciclev10029826m.g
NPGA	S08_3701588	1.1576e-08	0.51861	7.93644	8	3701588	46.436	ID=Ciclev10027659m.g
NPGA	S08_4892310	1.218e-08	0.51754	7.91435	8	4892310	46.436	ID=Ciclev10028655m.g
NPGA	S08_4075187	1.3594e-08	0.51522	7.86665	8	4075187	46.436	ID=Ciclev10028081m.g
NPGA	S08_3998172	1.4068e-08	0.5145	7.85177	8	3998172	46.436	ID=Ciclev10029698m.g
NPGA	S08_5956341	1.4201e-08	0.499	7.84768	8	5956341	53.506	ID=Ciclev10027795m.g
NPGA	S08_4140439	1.6612e-08	0.51893	7.77958	8	4140439	46.436	ID=Ciclev10029477m.g
NPGA	S08_4553146	1.8129e-08	0.5091	7.74163	8	4553146	46.436	ID=Ciclev10029521m.g
NPGA	S08_6142645	2.8185e-08	0.49191	7.54998	8	6142645	53.506	ID=Ciclev10028670m.g
NPGA	S08_2438501	3.6761e-08	0.48613	7.43461	8	2438501	48.176	ID=Ciclev10028922m.g
NPGA	S08_5052181	5.4754e-08	0.5007	7.26158	8	5052181	46.436	ID=Ciclev10030203m.g
NPGA	S08_6026790	5.8191e-08	0.4913	7.23514	8	6026790	53.506	ID=Ciclev10027952m.g
NPGA	S08_2971896	6.5842e-08	0.47322	7.1815	8	2971896	37.459	ID=Ciclev10027850m.g
NPGA	S08_5896067	9.6472e-08	0.45737	7.0156	8	5896067	51.75	ID=Ciclev10029285m.g
NPGA	S08_2107212	1.0293e-07	0.47057	6.98746	8	2107212	28.512	ID=Ciclev10028015m.g
NPGA	S08_3026111	1.0984e-07	0.47673	6.95924	8	3026111	32.615	ID=Ciclev10028435m.g
NPGA	S08_1716603	1.2213e-07	0.45202	6.91318	8	1716603	23.197	ID=Ciclev10028052m.g
NPGA	S08_3000113	1.5439e-07	0.44665	6.81138	8	3000113	37.459	ID=Ciclev10027863m.g
NPGA	S08_2818887	2.0295e-07	0.44033	6.69261	8	2818887	30.267	ID=Ciclev10029198m.g
NPGA	S08_2854197	2.1085e-07	0.43945	6.67603	8	2854197	30.267	ID=Ciclev10030127m.g
NPGA	S08_2844093	2.126e-07	0.43925	6.67244	8	2844093	30.267	ID=Ciclev10027715m.g
NPGA	S08_2635803	2.1276e-07	0.43924	6.67211	8	2635803	30.267	ID=Ciclev10027853m.g
NPGA	S08_2720245	2.1279e-07	0.43923	6.67205	8	2720245	30.267	ID=Ciclev10028040m.g
NPGA	S08_4871092	3.1757e-07	0.47531	6.49816	8	4871092	46.436	ID=Ciclev10029936m.g
NPGA	S08_2788922	3.8863e-07	0.43199	6.41046	8	2788922	30.267	ID=Ciclev10029184m.g
NPGA	S08_1796166	5.2552e-07	0.41781	6.27941	8	1796166	23.197	ID=Ciclev10030194m.g
NPGA	S08_2850376	5.8659e-07	0.43636	6.23167	8	2850376	30.267	ID=Ciclev10027734m.g
NPGA	S08_2188117	6.8307e-07	0.40485	6.16553	8	2188117	28.512	ID=Ciclev10029597m.g
NPGA	S08_2289097	1.1216e-06	0.39925	5.95016	8	2289097	28.512	ID=Ciclev10028343m.g
NPGA	S08_2263871	1.212e-06	0.39732	5.9165	8	2263871	28.512	ID=Ciclev10028649m.g
NPGA	S08_2172917	1.2142e-06	0.39727	5.91571	8	2172917	28.512	ID=Ciclev10029274m.g
NPGA	S08_1493068	2.3821e-06	0.38026	5.62304	8	1493068	0	ID=Ciclev10028513m.g
NPGA	S08_1422214	3.2095e-06	0.3726	5.49356	8	1422214	0	ID=Ciclev10028083m.g
NPGA	S08_1359809	3.6164e-06	0.38243	5.44172	8	1359809	0	ID=Ciclev10028967m.g
NPGA	S08_2529040	3.8444e-06	0.3808	5.41517	8	2529040	27.705	ID=Ciclev10029973m.g
NPGA	S08_1411532	3.9007e-06	0.36141	5.40886	8	1411532	21.442	ID=Ciclev10027748m.g
NPGA	S08_1433038	3.9007e-06	0.36141	5.40886	8	1433038	21.442	ID=Ciclev10028868m.g
NPGA	S08_1649129	4.253e-06	0.3781	5.3713	8	1649129	0	ID=Ciclev10027661m.g
NPGA	S08_1605876	6.5983e-06	0.3537	5.18057	8	1605876	21.442	ID=Ciclev10028366m.g
NPGA	S08_2429542	9.2461e-06	0.35074	5.03404	8	2429542	26.771	ID=Ciclev10028186m.g
NPGA	S08_1640724	1.1141e-05	0.34564	4.95308	8	1640724	21.442	ID=Ciclev10027822m.g
NPGA	S08_1618894	1.1186e-05	0.34553	4.95133	8	1618894	21.442	ID=Ciclev10030142m.g
NPGA	S08_1814724	1.5478e-05	0.36226	4.81029	8	1814724	23.197	ID=Ciclev10029877m.g
NPGA	S08_19394032	2.5329e-05	0.35454	4.59638	8	19394032	93.334	ID=Ciclev10028229m.g
NPGA	S08_1241936	2.6302e-05	0.31601	4.58001	8	1241936	19.688	ID=Ciclev10029765m.g
NPGA	S08_17500054	4.0508e-05	0.321	4.39246	8	17500054	67.714	ID=Ciclev10028402m.g
NPGA	S08_689245	4.2191e-05	0.30818	4.37478	8	689245	7.215	ID=Ciclev10028093m.g
NPGA	S08_1165513	4.5466e-05	0.30602	4.34231	8	1165513	16.115	ID=Ciclev10028863m.g
NPGA	S08_1214214	4.6242e-05	0.30553	4.33496	8	1214214	19.688	ID=Ciclev10029600m.g
NPGA	S08_864884	5.3824e-05	0.29051	4.26902	8	864884	7.215	ID=Ciclev10029529m.g
PE	S01_25165173	1.9663e-17	0.9467	16.7064	1	25165173	119.322	ID=Ciclev10007884m.g
PE	S01_25331390	1.9663e-17	0.9467	16.7064	1	25331390	122.99	ID=Ciclev10010155m.g
PE	S01_25497528	9.5621e-15	0.92122	14.0194	1	25497528	126.64	ID=Ciclev10008781m.g
PE	S01_25690547	1.3375e-13	0.91147	12.8737	1	25690547	126.64	ID=Ciclev10007867m.g
PE	S01_23110907	1.5053e-10	0.81164	9.82238	1	23110907	101.361	ID=Ciclev10009869m.g
PE	S01_23259161	4.7261e-09	0.71198	8.3255	1	23259161	101.361	ID=Ciclev10010406m.g
PE	S01_23162602	1.2319e-08	0.7052	7.90942	1	23162602	101.361	ID=Ciclev10010287m.g
PE	S01_24116702	1.2319e-08	0.7052	7.90942	1	24116702	109.636	ID=Ciclev10007802m.g
PE	S01_24329530	1.2868e-08	0.67797	7.89049	1	24329530	109.636	ID=Ciclev10007904m.g
PE	S01_23431732	2.7956e-08	0.70091	7.55352	1	23431732	101.361	ID=Ciclev10007691m.g
PE	S01_22694645	1.0107e-07	0.62964	6.99538	1	22694645	95.277	ID=Ciclev10010199m.g
PE	S01_24525941	4.5334e-07	0.64544	6.34358	1	24525941	111.35	ID=Ciclev10008687m.g
PE	S01_22975873	4.9266e-07	0.61436	6.30745	1	22975873	95.277	ID=Ciclev10007536m.g
PE	S01_27512849	2.0866e-06	0.60041	5.68056	1	27512849	139.953	ID=Ciclev10009728m.g
PE	S01_18009707	2.8415e-06	0.59065	5.54645	1	18009707	79.356	ID=Ciclev10007869m.g
PE	S01_26030989	5.2982e-06	0.55584	5.27587	1	26030989	129.05	ID=Ciclev10007933m.g
PE	S01_26060166	6.1792e-06	0.51132	5.20907	1	26060166	129.05	ID=Ciclev10007734m.g
PE	S01_22449826	6.4651e-06	0.56355	5.18942	1	22449826	84.55	ID=Ciclev10009601m.g
PE	S01_26102810	1.1639e-05	0.50248	4.93408	1	26102810	129.05	ID=Ciclev10007497m.g
PE	S01_26796432	1.319e-05	0.48589	4.87976	1	26796432	130.746	ID=Ciclev10010390m.g
PE	S01_26815936	1.319e-05	0.48589	4.87976	1	26815936	130.746	ID=Ciclev10008911m.g
PE	S01_17831378	1.4379e-05	0.50797	4.84227	1	17831378	79.356	ID=Ciclev10009061m.g
PE	S01_27687717	1.4686e-05	0.52067	4.8331	1	27687717	143.483	ID=Ciclev10007320m.g
PE	S01_22281840	2.5513e-05	0.50053	4.59324	1	22281840	82.836	ID=Ciclev10007873m.g
PE	S01_25990600	3.1049e-05	0.52159	4.50795	1	25990600	129.05	ID=Ciclev10007524m.g

## Sheet: Table S6
Table S6. Gene annotations in the assembled sequence of the genomic region of chromosome 8 associated with male sterility. Annotations related to pollen development are indicated in red letters. (https://phytozome-next.jgi.doe.gov). Number in brackets close to the gene identifier indicates that it contains a SNP marker. (1) S08_6026790; (2) S08_6050573 and (3) S08_6142645.
Gene identifier	Initial position	Final position	Size	Sense	Functional anotations in Phytozome
Ciclev10029967m.g	5913054	5914658	1604	forward	ATP binding;nucleic acid binding;helicases
Ciclev10030261m.g	5923981	5925498	1517	forward	Malectin/receptor-like protein kinase family protein
Ciclev10028169m.g	5939929	5946922	6993	reverse	SUMO-activating enzyme 2
Ciclev10027795m.g	5950969	5956596	5627	forward	SNF2 domain-containing protein / helicase domain-containing protein
Ciclev10030207m.g	5957670	5958563	893	reverse	Tetratricopeptide repeat (TPR)-like superfamily protein
Ciclev10030265m.g	5969535	5970491	956	reverse	Pentatricopeptide repeat (PPR) superfamily protein
Ciclev10028132m.g	5985063	5987794	2731	reverse	Tetratricopeptide repeat (TPR)-like superfamily protein
Ciclev10028124m.g	5991003	5994224	3221	reverse	ATP binding;nucleic acid binding;helicases
Ciclev10029744m.g	6024237	6025801	1564	reverse	Pentatricopeptide repeat (PPR) superfamily protein
Ciclev10027952m.g (1)	6025802	6031497	5695	reverse	BEL1-like homeodomain 6
Ciclev10028838m.g	6041184	6043615	2431	reverse	alpha/beta-Hydrolases superfamily protein
Ciclev10027768m.g (2)	6047429	6054970	7541	forward	RNA-binding (RRM/RBD/RNP motifs) family protein
Ciclev10030257m.g	6057618	6062060	4442	forward	beta-galactosidase 3
Ciclev10029260m.g	6065092	6068908	3816	forward	PHD finger family protein / bromo-adjacent homology (BAH) domain-containing protein
Ciclev10028263m.g	6068944	6075685	6741	reverse	Transducin/WD40 repeat-like superfamily protein
Ciclev10028320m.g	6076663	6079985	3322	reverse	purple acid phosphatase 10
Ciclev10029917m.g	6109131	6109451	320	forward	Papain family cysteine protease
Ciclev10028369m.g	6124675	6128024	3349	reverse	purple acid phosphatase 10
Ciclev10028670m.g (3)	6141140	6143433	2293	forward	Papain family cysteine protease
Ciclev10027828m.g	6146653	6154380	7727	reverse	vacuolar proton ATPase A3
Ciclev10027807m.g	6157357	6162759	5402	reverse	Minichromosome maintenance (MCM2/3/5) family protein
Ciclev10029805m.g	6178781	6179651	870	reverse	Lateral root primordium (LRP) protein-related
Ciclev10027697m.g	6193646	6199421	5775	reverse	Coatomer, alpha subunit
Ciclev10029294m.g	6253006	6254421	1415	forward	B-box zinc finger family protein
Ciclev10027716m.g	6255916	6268429	12513	reverse	Kinesin motor family protein
Ciclev10028302m.g	6276551	6280582	4031	forward	xylulose kinase-1
Ciclev10028627m.g	6289477	6292850	3373	forward	RNA-binding CRS1 / YhbY (CRM) domain protein
Ciclev10028123m.g	6293020	6297887	4867	reverse	MATE efflux family protein
Ciclev10028133m.g	6298166	6304194	6028	reverse	MATE efflux family protein
Ciclev10028537m.g	6315013	6322458	7445	forward	squalene synthase 1
Ciclev10029611m.g	6322767	6323840	1073	reverse	SH3 domain-containing protein
Ciclev10029446m.g	6326415	6328971	2556	reverse	SH3 domain-containing protein
Ciclev10030242m.g	6355458	6359023	3565	forward	ATP binding;nucleic acid binding;helicases
Ciclev10028481m.g	6373589	6374942	1353	forward	Pentatricopeptide repeat (PPR) superfamily protein
Ciclev10028233m.g	6402840	6404443	1603	forward	ATP binding;nucleic acid binding;helicases
Ciclev10030082m.g	6411573	6413114	1541	forward	ATP binding;nucleic acid binding;helicases
Ciclev10030363m.g	6432107	6432927	820	forward	S-adenosyl-L-homocysteine hydrolase
Ciclev10030279m.g	6434300	6435849	1549	forward	Pentatricopeptide repeat (PPR) superfamily protein
Ciclev10029914m.g	6451978	6453577	1599	forward	Pentatricopeptide repeat (PPR) superfamily protein
Ciclev10030131m.g	6457393	6459217	1824	forward	Subtilisin-like serine endopeptidase family protein
Ciclev10029947m.g	6460563	6461664	1101	forward	ATP binding;nucleic acid binding;helicases
Ciclev10027857m.g	6463695	6468742	5047	forward	Subtilase family protein
Ciclev10028860m.g	6474195	6475882	1687	forward	GATA transcription factor 5
Ciclev10029925m.g	6480797	6481843	1046	reverse	homolog of human DNA ligase iv-binding protein XRCC4
Ciclev10030000m.g	6520094	6520453	359	forward	myb domain protein 10
Ciclev10028122m.g	6535912	6540574	4662	forward	ferulic acid 5-hydroxylase 1
Ciclev10029230m.g	6554902	6560226	5324	reverse	Protein of unknown function (DUF1640)
Ciclev10029948m.g	6608855	6610058	1203	forward	2-oxoglutarate (2OG) and Fe(II)-dependent oxygenase superfamily protein
Ciclev10027673m.g	6632695	6643448	10753	reverse	nucleic acid binding;zinc ion binding;DNA binding
Ciclev10029089m.g	6651051	6656927	5876	reverse	zinc knuckle (CCHC-type) family protein
Ciclev10027856m.g	6659340	6662205	2865	reverse	Glycosyl hydrolase family protein
Ciclev10028301m.g	6681476	6683886	2410	forward	glycosyl hydrolase 9B18
Ciclev10028594m.g	6689819	6692205	2386	forward	fructose-bisphosphate aldolase 2
Ciclev10029284m.g	6700441	6703748	3307	reverse	B-box type zinc finger family protein
Ciclev10027758m.g	6720459	6728359	7900	forward	ATP binding microtubule motor family protein
Ciclev10029601m.g	6735308	6738952	3644	forward	LYR family of Fe/S cluster biogenesis protein
Ciclev10028728m.g	6744257	6749656	5399	forward	NAD(P)-binding Rossmann-fold superfamily protein
Ciclev10028844m.g	6750503	6754741	4238	reverse	ubiquitin fusion degradation 1
Ciclev10030361m.g	6757857	6759743	1886	reverse	ATP binding;nucleic acid binding;helicases
Ciclev10029872m.g	6770440	6772359	1919	reverse	TTF-type zinc finger protein with HAT dimerisation domain
Ciclev10028181m.g	6790357	6792194	1837	reverse	ATP binding;nucleic acid binding;helicases
Ciclev10030145m.g	6805621	6806699	1078	reverse	ATP binding;nucleic acid binding;helicases
Ciclev10027873m.g	6834487	6837762	3275	reverse	arginine decarboxylase 1
Ciclev10029417m.g	6861446	6864004	2558	reverse	ATPase, F0/V0 complex, subunit C protein
Ciclev10030192m.g	6887388	6887976	588	forward	NAD(P)-linked oxidoreductase superfamily protein
Ciclev10028892m.g	6893732	6897309	3577	forward	NAD(P)-linked oxidoreductase superfamily protein
Ciclev10028796m.g	6897536	6901468	3932	reverse	3-oxo-5-alpha-steroid 4-dehydrogenase family protein

## Sheet: Table S7
Table S7. Genotypes for S08_6142645 SNP in different commercial mandarin cultivars.
Group		Variety	Reference	Male sterile cytoplasm	Phenotype	S08_6142645
Satsuma mandarin	Citrus unshiu (Mak.) Marc.	Okitsu	IVIA-195	yes	sterile	C:C
Clementine mandarin	C. clementina Hort. ex Tan.	Clemenules	IVIA-022	no	fertile	T:T
Mandarin	C. nobilis Lour.	Campeona	IVIA-193	no	fertile	T:T
Mandarin hybrid	C. clementina × C. tangerina	Fortune	IVIA-080	no	fertile	T:T
Mandarin hybrid	C. nobilis × C. deliciosa	Encore	IVIA-155	no	fertile	C:T
Mandarin hybrid	C. unshiu × C. nobilis	Kara	IVIA-218	yes	fertile	C:T
Mandarin hybrid	C. unshiu × Unkwown	Queen	IVIA-579	yes	sterile	C:C
Tangor	C. reticulata × C. sinensis	Ellendale	IVIA-194	no	fertile	T:T
Tangor	C. unshiu × C. sinensis	Kiyomi	IVIA-405	yes	sterile	C:C
Tangor	C. sinensis × Unkwown mandarin	Murcott	IVIA-196	no	fertile	C:T
Tangor	C. reticulata × C. sinensis	Nadorcott	IVIA-388	no	fertile	C:T

## Sheet: Table S8
Table S8. Phenotypes for polyembryony and genotypes for S01_25497528 SNP (SNP1) in a germplasm collection.
Group		Variety	Reference	n	PE (%)	Phenotype	SNP1
Satsuma mandarin	Citrus unshiu (Mak.) Marc.	Clausellina	IVIA-019	10	1	Poly	A:G
Satsuma mandarin	C. unshiu (Mak.) Marc.	Okitsu	IVIA-195	10	1	Poly	A:G
Clementine mandarin	C. clementina Hort. ex Tan.	Clemenules	IVIA-022	50	0	Mono	A:A
Clementine mandarin	C. clementina Hort. ex Tan.	Fina	IVIA-039	50	0	Mono	A:A
Clementine mandarin	C. clementina Hort. ex Tan.	Arrufatina	IVIA-058	50	0	Mono	A:A
Clementine mandarin	C. clementina Hort. ex Tan.	Oronules	IVIA-132	50	0	Mono	A:A
Clementine mandarin	C. clementina Hort. ex Tan.	Monreal	IVIA-459	50	0	Mono	A:A
Mandarin	C. temple Hort.	Temple	IVIA-081	35	0	Mono	A:A
Mandarin	C. tangerina Hort. ex Tan.	Parson's Special	IVIA-168	25	1	Poly	A:G
Mandarin	C. tangerina Hort. ex Tan.	Dancy	IVIA-434	12	1	Poly	A:G
Mandarin	C. reticulata Blanco	Anana	IVIA-390	11	1	Poly	A:G
Mandarin	C. reticulata Blanco	Emperor	IVIA-394	50	1	Poly	A:G
Mandarin	C. reticulata Blanco	Scarlet	IVIA-411	50	1	Poly	G:G
Mandarin	C. reticulata Blanco	Ponkan	IVIA-482	33	1	Poly	A:G
Mandarin	C. reticulata Blanco	Temple Hybrid	IVIA-634	25	0	Mono	A:A
Mandarin	C. nobilis Lour.	Campeona	IVIA-193	47	0	Mono	A:A
Mandarin	C. nobilis Lour.	King	IVIA-477	50	0.72	Poly	G:G
Mandarin	C. deliciosa Ten.	Común	IVIA-154	11	1	Poly	A:G
Mandarin	C. deliciosa Ten.	Tardivo Ciaculli	IVIA-186	21	1	Poly	A:G
Mandarin	C. deliciosa Ten.	Salteñita	IVIA-361	25	0.84	Poly	A:G
Mandarin	C. deliciosa Ten.	Común sin hueso	IVIA-383	2	1	Poly	A:G
Sweet Orange	C. sinensis (L.) Osb.	Sucreña	IVIA-032	20	1	Poly	A:G
Sweet Orange	C. sinensis (L.) Osb.	Sanguinelli	IVIA-034	10	1	Poly	A:G
Sweet Orange	C. sinensis (L.) Osb.	Newhall	IVIA-055	3	1	Poly	A:G
Sweet Orange	C. sinensis (L.) Osb.	Salustiana Gil	IVIA-125	25	1	Poly	A:G
Sweet Orange	C. sinensis (L.) Osb.	Lane Late	IVIA-198	3	1	Poly	A:G
Sweet Orange	C. sinensis (L.) Osb.	Shamouti	IVIA-270	1	1	Poly	A:G
Sweet Orange	C. sinensis (L.) Osb.	Tarocco	IVIA-271	25	1	Poly	A:G
Sweet Orange	C. sinensis (L.) Osb.	Valencia Late Delta	IVIA-363	25	1	Poly	A:G
Sweet Orange	C. sinensis (L.) Osb.	Maltaise Blonde	IVIA-391	50	1	Poly	A:G
Sweet Orange	C. aurantifum L.	Sevillano	IVIA-117	33	1	Poly	A:G
Sweet Orange	C. aurantifum L.	Bouquet de fleurs	IVIA-139	50	0.82	Poly	A:G
Grapefruit	C. paradisi Macf.	Star Ruby	IVIA-197	20	1	Poly	A:G
Grapefruit	C. paradisi Macf.	Duncan	IVIA-274	11	1	Poly	A:G
Grapefruit	C. paradisi Macf.	Rio Red	IVIA-289	45	0.977778	Poly	A:G
Lemon	C. meyeri Y. Tan.	Meyer	IVIA-145	50	0.16	Mono	A:A
Lemon	C. limon (L.) Burm f.	Eureka Frost	IVIA-297	50	0.56	Poly	A:G
Lemon	C. jambhiri Lush.	Rugoso	IVIA-333	35	0.8	Poly	A:G
Lime	C. limonia Osb.	Rangpur	IVIA-334	50	0.62	Poly	A:G
Lime	C. limettioides Tan.	Dulce Palestina	IVIA-305	50	0.46	Poly	A:G
Citron	C. medica L.	Arizona	IVIA-169	16	0.1875	Mono	A:A
Citron	C. medica L.	Diamante	IVIA-560	6	0	Mono	A:A
Citron	C. medica L.	Córcega	IVIA-567	10	0	Mono	A:A
Pummelo	C. grandis × C. grandis	Chandler	IVIA-207	50	0	Mono	A:A
Pummelo	C. grandis (L.) Osb.	Pink	IVIA-275	50	0	Mono	A:A
Pummelo	C. grandis (L.) Osb.	Azimboa	IVIA-420	50	0	Mono	A:A
Bergamot	C. bergamia Risso and Poit.	Calabria	IVIA-254	14	0.214286	Mono	A:A
Mandarin hybrid	C. unshiu × C. nobilis	Kara	IVIA-218	3	1	Poly	A:G
Mandarin hybrid	C. unshiu × C. deliciosa	Simeto	IVIA-413	25	0.88	Poly	A:G
Mandarin hybrid	C. unshiu × C. deliciosa	Primosole	IVIA-414	50	0.04	Mono	A:A
Mandarin hybrid	C. nobilis × C. deliciosa	Wilking	IVIA-028	25	0.12	Mono	A:A
Mandarin hybrid	C. nobilis × C. deliciosa	Kinnow	IVIA-033	26	0.884615	Poly	A:G
Mandarin hybrid	C. nobilis × C. deliciosa	Encore	IVIA-155	50	0.02	Mono	A:A
Mandarin hybrid	C. nobilis × C. deliciosa	Honey	IVIA-209	10	0	Mono	A:A
Mandarin hybrid	C. clementina × C. tangerina	Fortune	IVIA-080	50	0	Mono	A:A
Mandarin hybrid	C. clementina × C. reticulata	Fremont	IVIA-082	33	1	Poly	A:G
Mandarin hybrid	C. clementina × C. nobilis	Palazzelli	IVIA-188	50	0	Mono	A:A
Mandarin hybrid	C. clementina × (C. unshiu × C. nobilis)	Moncada	IVIA-421	50	0	Mono	A:A
Mandarin hybrid	C. clementina × (C. unshiu × C. nobilis)	N-27	IVIA-423	1	1	Poly	A:G
Mandarin hybrid	C. clementina × (C. paradisi x C. tangerina)	Fairchild	IVIA-083	14	1	Poly	A:G
Mandarin hybrid	C. clementina × (C. paradisi × C. tangerina)	Nova	IVIA-074	26	0.961538	Poly	A:G
Mandarin hybrid	[C. clementina × (C. paradisi × C. tangerina)] × C. temple	Fallglo	IVIA-466	50	0	Mono	A:A
Mandarin hybrid	[C. clementina × (C. paradisi × C. tangerina)] × [C. clementina × (C. paradisi × C. tangerina)]	Sunburst	IVIA-200	9	1	Poly	A:G
Mandarin hybrid	(C. paradisi × C. tangerina) × C. clementina	Page	IVIA-079	50	0.98	Poly	A:G
Mandarin hybrid	(C. clementina × C. tangerina) × (C. clementina × C. reticulata)	Daisy	IVIA-362	36	0.0277778	Mono	A:A
Tangor	C. unshiu × C. sinensis	Umatilla	IVIA-100	50	0	Mono	A:A
Tangor	C. unshiu × C. sinensis	Kiyomi	IVIA-405	5	0	Mono	A:A
Tangor	C. tangerina × C. sinensis	Dweet	IVIA-165	25	1	Poly	A:G
Tangor	C. sinensis × Unkwown mandarin	Murcott	IVIA-196	30	1	Poly	A:G
Tangor	C. reticulata × C. sinensis	Ellendale	IVIA-194	50	0	Mono	A:A
Tangor	C. reticulata × C. sinensis	Ortanique	IVIA-276	15	1	Poly	A:G
Tangelo	C. paradisi × C. tangerina	Minneola	IVIA-084	27	1	Poly	A:G
Tangelo	C. reticulata × C. paradisi	Ugli	IVIA-689	25	1	Mono	A:A
Tangelo	C. paradisi × C. tangerina	Orlando	IVIA-101	14	1	Poly	A:G
Tangelo	C. paradisi × C. tangerina	Seminole	IVIA-348	27	1	Poly	A:G
Citrange	C. sinensis × P. trifoliata	Troyer	IVIA-386	26	1	Poly	A:G
Citrumelo	C. paradisi × P. trifoliata	CPB 4475	IVIA-208	35	0.971429	Poly	A:A
Fortunella	F. polyandra (Ridl.) Tan.	Malayan Kumquat	IVIA-375	50	0.64	Poly	A:A
Fortunella	F. japonica (Thumb.) Swing.	Round Kumquat	IVIA-381	65	0.953846	Poly	A:A
Fortunella	F. hindsii (Champ.) Swing.	Hong Kong Kumquat	IVIA-281	47	0.06	Mono	A:A
Fortunella	F. crassifolia Swing.	Meiwa Kumquat	IVIA-280	50	0.92	Poly	A:A
Poncirus	Poncirus trifoliata (L.) Raf.	Rubidoux	IVIA-217	50	0.76	Poly	A:A
Poncirus	P. trifoliata (L.) Raf.	Flying dragon	IVIA-537	50	0.7	Poly	A:A
n: number of seeds evaluated; PE(%): percentage of polyembryonic seeds; Phenotype: Mono (monoembryonic) or Poly (polyembryonic).
